# Supplementary material for: Transcriptional Correlates of Structure-Function Coupling Plasticity in Trigeminal Neuralgia: Unveiling the Synaptic and Metabolic Mechanisms of Recovery
Source: Research Square preprint supplement (doi:10.21203/rs.3.rs-8527336/v1), 2026-01-08
Supplement: Supplementary file 1 [file 3b1f0d63384ddd319dd7d200.xlsx]

## Sheet: Table S1 WholeBrain
Table S1 WholeBrain_PairwiseTtests_Hybrid
Comparison	T_statistic	P_uncorrected	P_corrected_FDR	Significant_FDR
HC vs TNpre (indep)	2.4879991666988746	0.014646497322697585	0.021969745984046378	TRUE
HC vs TNpost (indep)	0.001652312472536265	0.9986856692442604	0.9986856692442604	FALSE
TNpre vs TNpost (paired)	-3.55119	0.001042133542088165	0.003126400626264495	TRUE

## Sheet: Table S2 Network
Table S2 Network_PairwiseTtests_Hybrid
Network	Comparison	T_statistic	P_uncorrected	P_corrected_FDR	Significant_FDR
Vis	HC vs TNpre (indep)	1.25996081999419	0.21096083827260947	0.3164412574089142	FALSE
Vis	HC vs TNpost (indep)	-1.69767	0.09346822751728727	0.15098713675869482	FALSE
Vis	TNpre vs TNpost (paired)	-4.65766	3.844665837789105e-05	0.0008073798259357121	TRUE
SomMot	HC vs TNpre (indep)	3.211468605780546	0.0018176068306374855	0.009542435860846799	TRUE
SomMot	HC vs TNpost (indep)	0.7738427378457222	0.4412214646631337	0.5930880647274817	FALSE
SomMot	TNpre vs TNpost (paired)	-2.97134	0.005119417244828983	0.02150155242828173	TRUE
DorsAttn	HC vs TNpre (indep)	2.676578655672171	0.008838958639311638	0.030936355237590734	TRUE
DorsAttn	HC vs TNpost (indep)	0.3247001296312413	0.746262346019879	0.7835754633208729	FALSE
DorsAttn	TNpre vs TNpost (paired)	-3.83394	0.0004606707262972969	0.003235471510296224	TRUE
SalVentAttn	HC vs TNpre (indep)	2.5268064796648524	0.01343243465552604	0.03526014097075585	TRUE
SalVentAttn	HC vs TNpost (indep)	0.6257510185301992	0.5331990401543734	0.622065546846769	FALSE
SalVentAttn	TNpre vs TNpost (paired)	-2.41214	0.020795272695916855	0.046963501629545934	TRUE
Limbic	HC vs TNpre (indep)	0.7092456251744641	0.48011890954129466	0.5930880647274817	FALSE
Limbic	HC vs TNpost (indep)	-0.718686	0.47430129515932595	0.5930880647274817	FALSE
Limbic	TNpre vs TNpost (paired)	-3.8328	0.0004622102157566034	0.003235471510296224	TRUE
Cont	HC vs TNpre (indep)	2.076223719938146	0.04063803073048236	0.07111655377834414	FALSE
Cont	HC vs TNpost (indep)	0.4359500147402657	0.6639736660180422	0.7338656308620466	FALSE
Cont	TNpre vs TNpost (paired)	-2.67491	0.010963436462550904	0.032890309387652715	TRUE
Default	HC vs TNpre (indep)	2.2029756017324855	0.030071670365630833	0.05740955251620431	FALSE
Default	HC vs TNpost (indep)	0.22693938826081386	0.8210116541330588	0.8210116541330588	FALSE
Default	TNpre vs TNpost (paired)	-2.38134	0.02236357220454568	0.046963501629545934	TRUE

## Sheet: Table S3 ROI
Table S3 ROI_PairwiseTtests_Hybrid
ROI_Index	ROI_Name	Category	Logic_Code	Sig_HC_vs_TNpre	Sig_TNpre_vs_TNpost	Sig_HC_vs_TNpost	P_HC_vs_TNpre	P_TNpre_vs_TNpost	P_HC_vs_TNpost
0	LH_Vis_1	Compensation	F-T-F	FALSE	TRUE	FALSE	0.3811993772989057	0.0408913257887632	0.9953372326531156
1	LH_Vis_2	Unclassified	F-F-F	FALSE	FALSE	FALSE	0.5952575298173942	0.3363195921614482	0.9493787517038536
2	LH_Vis_3	Unclassified	F-F-F	FALSE	FALSE	FALSE	0.493835193769456	0.1346245449909676	0.9961593043081346
3	LH_Vis_4	Compensation	F-T-F	FALSE	TRUE	FALSE	0.322411946313759	0.0146304617642221	0.8512693304650814
4	LH_Vis_5	Compensation	F-T-F	FALSE	TRUE	FALSE	0.7092797161309876	0.0099846267018897	0.361965716245998
5	LH_Vis_6	Unclassified	F-F-F	FALSE	FALSE	FALSE	0.5754765091351557	0.3484869896878633	0.7774417946764121
6	LH_Vis_7	Unclassified	F-F-F	FALSE	FALSE	FALSE	0.8371321550126058	0.2725208557933126	0.636836563214678
7	LH_Vis_8	Unclassified	F-F-F	FALSE	FALSE	FALSE	0.77076334225948	0.5831845224230311	0.9013004704365372
8	LH_Vis_9	Compensation	F-T-F	FALSE	TRUE	FALSE	0.5754765091351557	0.0332032515321691	0.1654702950716715
9	LH_Vis_10	Compensation	F-T-F	FALSE	TRUE	FALSE	0.4563849552471832	0.0048526038486127	0.330141374590324
10	LH_Vis_11	Compensation	F-T-F	FALSE	TRUE	FALSE	0.5860801440445972	0.0198007544031811	0.8739816522438512
11	LH_Vis_12	Unclassified	F-F-F	FALSE	FALSE	FALSE	0.8476128659861846	0.1020740049121287	0.333943702738432
12	LH_Vis_13	Unclassified	F-F-F	FALSE	FALSE	FALSE	0.5609608555325637	0.1305880427478201	0.5986561974038905
13	LH_Vis_14	Unclassified	F-F-F	FALSE	FALSE	FALSE	0.3490036579610951	0.4749225493388107	0.9748708478285188
14	LH_Vis_15	Unclassified	F-F-F	FALSE	FALSE	FALSE	0.7969215553195066	0.0674154751108877	0.3262574050192021
15	LH_Vis_16	Compensation	F-T-F	FALSE	TRUE	FALSE	0.3958043469419232	0.0269598431788285	0.420674910031878
16	LH_Vis_17	Unclassified	F-F-F	FALSE	FALSE	FALSE	0.3273499250723344	0.1154130847576245	0.772096575482385
17	LH_Vis_18	Compensation	F-T-F	FALSE	TRUE	FALSE	0.5558431170462109	0.009012905630646	0.1649469098533047
18	LH_Vis_19	Unclassified	F-F-F	FALSE	FALSE	FALSE	0.9721311186223708	0.0959921436081649	0.3363195921614482
19	LH_Vis_20	Compensation	F-T-F	FALSE	TRUE	FALSE	0.0532353364028611	0.015045927238822	0.6892732559794477
20	LH_Vis_21	Compensation	F-T-F	FALSE	TRUE	FALSE	0.1020740049121287	0.0214696348104918	0.5072518592951091
21	LH_Vis_22	Compensation	F-T-F	FALSE	TRUE	FALSE	0.1524918332344825	0.0090350091896365	0.4778280147218234
22	LH_Vis_23	Compensation	F-T-F	FALSE	TRUE	FALSE	0.7387227096451507	0.0408913257887632	0.3621095829394426
23	LH_Vis_24	Compensation	F-T-F	FALSE	TRUE	FALSE	0.8231704657817572	0.015948083399937	0.0945259062661192
24	LH_Vis_25	Compensation	F-T-F	FALSE	TRUE	FALSE	0.6159172488547789	0.0201326078446159	0.1590465486463829
25	LH_Vis_26	Unclassified	F-F-F	FALSE	FALSE	FALSE	0.5076349867516552	0.0945259062661192	0.348753654144215
26	LH_Vis_27	Compensation	F-T-F	FALSE	TRUE	FALSE	0.9274840431431608	0.028923789341774	0.1879591769265158
27	LH_Vis_28	Compensation	F-T-F	FALSE	TRUE	FALSE	0.3262574050192021	0.009012905630646	0.748094680923711
28	LH_Vis_29	Compensation	F-T-F	FALSE	TRUE	FALSE	0.7811809070100728	0.0086637716314862	0.2354067584299854
29	LH_Vis_30	Unclassified	F-F-F	FALSE	FALSE	FALSE	0.703384685702695	0.0649463465579647	0.2494129182598478
30	LH_Vis_31	Compensation	F-T-F	FALSE	TRUE	FALSE	0.3200569185711103	0.0146304617642221	0.8939259120450747
31	LH_SomMot_1	No Response	T-F-F	TRUE	FALSE	FALSE	0.0201326078446159	0.1072360653856948	0.4747285085246746
32	LH_SomMot_2	Unclassified	F-F-F	FALSE	FALSE	FALSE	0.1709258272292404	0.9013004704365372	0.5863996514173397
33	LH_SomMot_3	Unclassified	F-F-F	FALSE	FALSE	FALSE	0.0746934296578788	0.7358346968350374	0.2731752736579181
34	LH_SomMot_4	No Response	T-F-F	TRUE	FALSE	FALSE	0.0364489030349324	0.2287125648332899	0.4747285085246746
35	LH_SomMot_5	Unclassified	F-F-F	FALSE	FALSE	FALSE	0.0977206075101533	0.0568290603032244	0.9013004704365372
36	LH_SomMot_6	Unclassified	F-F-F	FALSE	FALSE	FALSE	0.1696970617695208	0.7742453562357448	0.9013004704365372
37	LH_SomMot_7	No Response	T-F-F	TRUE	FALSE	FALSE	0.0364489030349324	0.5268423808407973	0.4271977189480438
38	LH_SomMot_8	Unclassified	F-F-F	FALSE	FALSE	FALSE	0.0764691951752011	0.2879955032429339	0.4406593137063421
39	LH_SomMot_9	No Response	T-F-F	TRUE	FALSE	FALSE	0.0234268410726769	0.0819648700206573	0.4516618443534022
40	LH_SomMot_10	Unclassified	F-F-F	FALSE	FALSE	FALSE	0.1945728045769608	0.348753654144215	0.869424423577896
41	LH_SomMot_11	Unclassified	F-F-F	FALSE	FALSE	FALSE	0.2061046165267348	0.5490560807835597	0.5476680557288592
42	LH_SomMot_12	No Response	T-F-F	TRUE	FALSE	FALSE	0.029963839642861	0.4426370916310245	0.2276912506599142
43	LH_SomMot_13	No Response	T-F-F	TRUE	FALSE	FALSE	0.0454917208005805	0.1346245449909676	0.3451363963492803
44	LH_SomMot_14	Normalization	T-T-F	TRUE	TRUE	FALSE	0.0048526038486127	0.0483147828350997	0.2135923370550535
45	LH_SomMot_15	Unclassified	F-F-F	FALSE	FALSE	FALSE	0.1591517225758664	0.1020740049121287	0.9990745892337748
46	LH_SomMot_16	Unclassified	F-F-F	FALSE	FALSE	FALSE	0.0726222181741692	0.4229707404377011	0.3485696059754304
47	LH_SomMot_17	No Response	T-F-F	TRUE	FALSE	FALSE	0.021682741880186	0.3363195921614482	0.4205805045284408
48	LH_SomMot_18	Unclassified	F-F-F	FALSE	FALSE	FALSE	0.0829113935884509	0.0746584048770347	0.7273332190493637
49	LH_SomMot_19	No Response	T-F-F	TRUE	FALSE	FALSE	0.0306269406187585	0.440250801715472	0.3596321263186966
50	LH_SomMot_20	Compensation	F-T-F	FALSE	TRUE	FALSE	0.1072360653856948	0.0182094689697573	0.7753818650685212
51	LH_SomMot_21	No Response	T-F-F	TRUE	FALSE	FALSE	0.0457737143198168	0.0633026510360769	0.8234597254417764
52	LH_SomMot_22	Unclassified	F-F-F	FALSE	FALSE	FALSE	0.1608089109847429	0.1331168322996994	0.9097032320749168
53	LH_SomMot_23	Unclassified	F-F-F	FALSE	FALSE	FALSE	0.146259610411434	0.4205805045284408	0.5365294796454486
54	LH_SomMot_24	Unclassified	F-F-F	FALSE	FALSE	FALSE	0.0793967036220722	0.0980925934062218	0.8154539161600027
55	LH_SomMot_25	Unclassified	F-F-F	FALSE	FALSE	FALSE	0.1475635737788387	0.2007381618990392	0.9748708478285188
56	LH_SomMot_26	Unclassified	F-F-F	FALSE	FALSE	FALSE	0.3572750094325319	0.1994455197982345	0.9477008403928936
57	LH_SomMot_27	Unclassified	F-F-F	FALSE	FALSE	FALSE	0.1723977187526166	0.3811013406532265	0.6129109950288056
58	LH_SomMot_28	Unclassified	F-F-F	FALSE	FALSE	FALSE	0.1002103879544845	0.0726330869525887	0.5365294796454486
59	LH_SomMot_29	Unclassified	F-F-F	FALSE	FALSE	FALSE	0.333943702738432	0.0944115929319642	0.8670359629761331
60	LH_SomMot_30	Unclassified	F-F-F	FALSE	FALSE	FALSE	0.3971205715821462	0.2573440203609364	0.9914759390852448
61	LH_SomMot_31	Compensation	F-T-F	FALSE	TRUE	FALSE	0.0902320964138185	0.0364489030349324	0.9185365207371362
62	LH_SomMot_32	Unclassified	F-F-F	FALSE	FALSE	FALSE	0.1747523215656732	0.0674154751108877	0.9013004704365372
63	LH_SomMot_33	Compensation	F-T-F	FALSE	TRUE	FALSE	0.2053103047313118	0.009012905630646	0.9961593043081346
64	LH_SomMot_34	Unclassified	F-F-F	FALSE	FALSE	FALSE	0.4914253415205118	0.1654702950716715	0.8182206010538996
65	LH_SomMot_35	Unclassified	F-F-F	FALSE	FALSE	FALSE	0.3418046081216714	0.1028723763120173	0.869424423577896
66	LH_SomMot_36	Unclassified	F-F-F	FALSE	FALSE	FALSE	0.1029150356278603	0.1643678764688197	0.8555312198909388
67	LH_SomMot_37	Compensation	F-T-F	FALSE	TRUE	FALSE	0.2517052819808154	0.0094438808539531	0.4747285085246746
68	LH_DorsAttn_Post	Unclassified	F-F-F	FALSE	FALSE	FALSE	0.9493787517038536	0.0800794612931631	0.7525683556590329
69	LH_DorsAttn_Post	Unclassified	F-F-F	FALSE	FALSE	FALSE	0.9565190302738223	0.892681793460675	0.9637906757367792
70	LH_DorsAttn_Post	Unclassified	F-F-F	FALSE	FALSE	FALSE	0.3933283665152808	0.3887246266517806	0.9493787517038536
71	LH_DorsAttn_Post	Unclassified	F-F-F	FALSE	FALSE	FALSE	0.876522353133522	0.4906087516181176	0.5894006221058956
72	LH_DorsAttn_Post	Unclassified	F-F-F	FALSE	FALSE	FALSE	0.5128567117906473	0.0614234966907702	0.5494937256420973
73	LH_DorsAttn_Post	Unclassified	F-F-F	FALSE	FALSE	FALSE	0.3455115681392314	0.3747025224948215	0.9490605522769958
74	LH_DorsAttn_Post	Unclassified	F-F-F	FALSE	FALSE	FALSE	0.2010254843635584	0.1002103879544845	0.9961593043081346
75	LH_DorsAttn_Post	Unclassified	F-F-F	FALSE	FALSE	FALSE	0.1475635737788387	0.1188856540752754	0.9961593043081346
76	LH_DorsAttn_Post	No Response	T-F-F	TRUE	FALSE	FALSE	0.0473977483802265	0.0674154751108877	0.7288051419876063
77	LH_DorsAttn_Post	Unclassified	F-F-F	FALSE	FALSE	FALSE	0.1533086686969761	0.3476753847842376	0.77076334225948
78	LH_DorsAttn_Post	No Response	T-F-F	TRUE	FALSE	FALSE	0.0323765036543483	0.1436504356585587	0.3884760825859438
79	LH_DorsAttn_Post	Unclassified	F-F-F	FALSE	FALSE	FALSE	0.145358536555497	0.053812946461179	0.9477008403928936
80	LH_DorsAttn_Post	Compensation	F-T-F	FALSE	TRUE	FALSE	0.0621716882947735	0.009012905630646	0.9185365207371362
81	LH_DorsAttn_Post	Unclassified	F-F-F	FALSE	FALSE	FALSE	0.1643678764688197	0.0945259062661192	0.7126105286831567
82	LH_DorsAttn_Post	Compensation	F-T-F	FALSE	TRUE	FALSE	0.3579743108085675	0.0220920554828177	0.77076334225948
83	LH_DorsAttn_Post	Compensation	F-T-F	FALSE	TRUE	FALSE	0.1175042836945147	0.0201229591444657	0.9882076365536332
84	LH_DorsAttn_Post	Compensation	F-T-F	FALSE	TRUE	FALSE	0.1072360653856948	0.0163931142314173	0.8361569172318949
85	LH_DorsAttn_FEF	Unclassified	F-F-F	FALSE	FALSE	FALSE	0.1180528768972903	0.2725525101691584	0.6293542156527082
86	LH_DorsAttn_FEF	Unclassified	F-F-F	FALSE	FALSE	FALSE	0.2905821217505048	0.3102689508322271	0.8820861762940977
87	LH_DorsAttn_FEF	Unclassified	F-F-F	FALSE	FALSE	FALSE	0.3530495039971955	0.5695421205399067	0.5103244040102475
88	LH_DorsAttn_FEF	Unclassified	F-F-F	FALSE	FALSE	FALSE	0.3455115681392314	0.793926407899986	0.7898061835077601
89	LH_DorsAttn_PrCv	Unclassified	F-F-F	FALSE	FALSE	FALSE	0.3277654216336742	0.3518293075447681	0.9493787517038536
90	LH_DorsAttn_PrCv	Unclassified	F-F-F	FALSE	FALSE	FALSE	0.4205805045284408	0.3572750094325319	0.946052438946531
91	LH_SalVentAttn_ParOper	Unclassified	F-F-F	FALSE	FALSE	FALSE	0.332611249100259	0.7670009405007016	0.7575081953680735
92	LH_SalVentAttn_ParOper	Unclassified	F-F-F	FALSE	FALSE	FALSE	0.9961593043081346	0.901671934024424	0.6428630914424122
93	LH_SalVentAttn_ParOper	Unclassified	F-F-F	FALSE	FALSE	FALSE	0.1311737573950044	0.0741819141743219	0.7549903226542074
94	LH_SalVentAttn_ParOper	Unclassified	F-F-F	FALSE	FALSE	FALSE	0.4751878683869091	0.591628962207388	0.6349320893576256
95	LH_SalVentAttn_TempOcc	Unclassified	F-F-F	FALSE	FALSE	FALSE	0.3455382330097265	0.9877906408314908	0.5135715133541111
96	LH_SalVentAttn_FrOperIns	Unclassified	F-F-F	FALSE	FALSE	FALSE	0.3363195921614482	0.1331168322996994	0.8486848845890027
97	LH_SalVentAttn_FrOperIns	Unclassified	F-F-F	FALSE	FALSE	FALSE	0.10794028533422	0.1721974592320889	0.7092797161309876
98	LH_SalVentAttn_FrOperIns	Unclassified	F-F-F	FALSE	FALSE	FALSE	0.6349320893576256	0.7575081953680735	0.6051054500732702
99	LH_SalVentAttn_FrOperIns	Unclassified	F-F-F	FALSE	FALSE	FALSE	0.0653390513690729	0.3549560445711898	0.4708446526186091
100	LH_SalVentAttn_FrOperIns	Unclassified	F-F-F	FALSE	FALSE	FALSE	0.9445789972990624	0.5447719341088456	0.8038752025705808
101	LH_SalVentAttn_FrOperIns	Unclassified	F-F-F	FALSE	FALSE	FALSE	0.2905821217505048	0.1473692460388989	0.8606822957987074
102	LH_SalVentAttn_FrOperIns	Unclassified	F-F-F	FALSE	FALSE	FALSE	0.3095487004986015	0.2077884762390258	0.9493787517038536
103	LH_SalVentAttn_FrOperIns	Unclassified	F-F-F	FALSE	FALSE	FALSE	0.0945259062661192	0.1233178194709817	0.4406593137063421
104	LH_SalVentAttn_FrOperIns	Unclassified	F-F-F	FALSE	FALSE	FALSE	0.0902320964138185	0.1145679662424034	0.7873023437840733
105	LH_SalVentAttn_PFCl	Unclassified	F-F-F	FALSE	FALSE	FALSE	0.1225394469307837	0.2327928519535154	0.3605519493439041
106	LH_SalVentAttn_Med	Unclassified	F-F-F	FALSE	FALSE	FALSE	0.1677443607781327	0.1145366602083932	0.9477008403928936
107	LH_SalVentAttn_Med	Unclassified	F-F-F	FALSE	FALSE	FALSE	0.1857576972312531	0.4597147967482519	0.762912323076209
108	LH_SalVentAttn_Med	Unclassified	F-F-F	FALSE	FALSE	FALSE	0.1260894980702712	0.6636899931080309	0.3363195921614482
109	LH_SalVentAttn_Med	Unclassified	F-F-F	FALSE	FALSE	FALSE	0.1145366602083932	0.1331168322996994	0.869424423577896
110	LH_SalVentAttn_Med	Unclassified	F-F-F	FALSE	FALSE	FALSE	0.0674154751108877	0.2473871051813018	0.4747285085246746
111	LH_SalVentAttn_Med	Unclassified	F-F-F	FALSE	FALSE	FALSE	0.1346245449909676	0.5587259538530764	0.3328062501009102
112	LH_SalVentAttn_Med	Unclassified	F-F-F	FALSE	FALSE	FALSE	0.5699815823836508	0.0746584048770347	0.3795956003392856
113	LH_Limbic_OFC	Unclassified	F-F-F	FALSE	FALSE	FALSE	0.7549903226542074	0.1145366602083932	0.703384685702695
114	LH_Limbic_OFC	Compensation	F-T-F	FALSE	TRUE	FALSE	0.1923737127668062	0.0483147828350997	0.9616973100198092
115	LH_Limbic_OFC	Unclassified	F-F-F	FALSE	FALSE	FALSE	0.9961593043081346	0.3262574050192021	0.9493787517038536
116	LH_Limbic_OFC	Unclassified	F-F-F	FALSE	FALSE	FALSE	0.7323098778337769	0.0735347997214552	0.8361569172318949
117	LH_Limbic_OFC	Unclassified	F-F-F	FALSE	FALSE	FALSE	0.7685799179500468	0.3498858764257535	0.9748708478285188
118	LH_Limbic_TempPole	Unclassified	F-F-F	FALSE	FALSE	FALSE	0.2160513649288939	0.330681257973111	0.9286593311761836
119	LH_Limbic_TempPole	Unclassified	F-F-F	FALSE	FALSE	FALSE	0.4991718775507545	0.208955294502344	0.9477008403928936
120	LH_Limbic_TempPole	Unclassified	F-F-F	FALSE	FALSE	FALSE	0.7344930781301583	0.1716378726245744	0.4454905021580491
121	LH_Limbic_TempPole	Unclassified	F-F-F	FALSE	FALSE	FALSE	0.9723352553724052	0.1524218307404364	0.3933283665152808
122	LH_Limbic_TempPole	Unclassified	F-F-F	FALSE	FALSE	FALSE	0.7335014427290943	0.0749101960223215	0.7421073314954327
123	LH_Limbic_TempPole	Compensation	F-T-F	FALSE	TRUE	FALSE	0.6538006741214614	0.0262932618168042	0.5268423808407973
124	LH_Limbic_TempPole	Unclassified	F-F-F	FALSE	FALSE	FALSE	0.8900780935514435	0.5268423808407973	0.8439609073181346
125	LH_Limbic_TempPole	Compensation	F-T-F	FALSE	TRUE	FALSE	0.4054468920931044	0.0465120133792025	0.1952862484669593
126	LH_Cont_Par	Compensation	F-T-F	FALSE	TRUE	FALSE	0.9090310837898026	0.0234268410726769	0.4904608765936664
127	LH_Cont_Par	Unclassified	F-F-F	FALSE	FALSE	FALSE	0.4169412216190553	0.6268722708751556	0.5296288623667401
128	LH_Cont_Par	Unclassified	F-F-F	FALSE	FALSE	FALSE	0.3965118767283446	0.4508985822158744	0.7230674787228738
129	LH_Cont_Par	Unclassified	F-F-F	FALSE	FALSE	FALSE	0.7575081953680735	0.5215586514955164	0.7092797161309876
130	LH_Cont_Par	Unclassified	F-F-F	FALSE	FALSE	FALSE	0.3549560445711898	0.8436232843688543	0.5587259538530764
131	LH_Cont_Par	Unclassified	F-F-F	FALSE	FALSE	FALSE	0.1072360653856948	0.5411530165164428	0.5476680557288592
132	LH_Cont_Temp	Unclassified	F-F-F	FALSE	FALSE	FALSE	0.6254497204186495	0.6234300386842446	0.6479691805375697
133	LH_Cont_OFC	Unclassified	F-F-F	FALSE	FALSE	FALSE	0.7753818650685212	0.0829113935884509	0.7795090474901278
134	LH_Cont_PFCl	Unclassified	F-F-F	FALSE	FALSE	FALSE	0.7208864941185593	0.3273499250723344	0.9566740487029992
135	LH_Cont_PFCl	Unclassified	F-F-F	FALSE	FALSE	FALSE	0.2921866736484892	0.5101462007263533	0.4725277312145422
136	LH_Cont_PFCl	Unclassified	F-F-F	FALSE	FALSE	FALSE	0.2918414689927144	0.4292870349478488	0.5476680557288592
137	LH_Cont_PFCl	Unclassified	F-F-F	FALSE	FALSE	FALSE	0.2742730697619114	0.330681257973111	0.9140848906937814
138	LH_Cont_PFCl	Unclassified	F-F-F	FALSE	FALSE	FALSE	0.3328062501009102	0.2108805236601011	0.935454081541984
139	LH_Cont_PFCl	Unclassified	F-F-F	FALSE	FALSE	FALSE	0.2601433637620168	0.1225380760443768	0.9961593043081346
140	LH_Cont_PFCl	Unclassified	F-F-F	FALSE	FALSE	FALSE	0.5180002227550158	0.6706848971000915	0.7387227096451507
141	LH_Cont_PFCl	Unclassified	F-F-F	FALSE	FALSE	FALSE	0.0743931351896408	0.5754765091351557	0.435066780006355
142	LH_Cont_PFCv	Unclassified	F-F-F	FALSE	FALSE	FALSE	0.5268423808407973	0.1728296933207178	0.9013004704365372
143	LH_Cont_pCun	Compensation	F-T-F	FALSE	TRUE	FALSE	0.2042649895840514	0.0079977251430696	0.6369559301994085
144	LH_Cont_pCun	Compensation	F-T-F	FALSE	TRUE	FALSE	0.1832902451106511	0.028923789341774	0.960705709471271
145	LH_Cont_Cing	Unclassified	F-F-F	FALSE	FALSE	FALSE	0.4355559478221965	0.1600422581304388	0.9870043675466328
146	LH_Cont_Cing	Unclassified	F-F-F	FALSE	FALSE	FALSE	0.171898940464236	0.1725971905303335	0.9607133954939217
147	LH_Cont_PFCmp	No Response	T-F-T	TRUE	FALSE	TRUE	0.009012905630646	0.4906087516181176	0.019273948774355
148	LH_Default_Temp	Unclassified	F-F-F	FALSE	FALSE	FALSE	0.9013004704365372	0.8038752025705808	0.5081906438351653
149	LH_Default_Temp	Unclassified	F-F-F	FALSE	FALSE	FALSE	0.9920675156653612	0.869424423577896	0.8096407304815106
150	LH_Default_Temp	Unclassified	F-F-F	FALSE	FALSE	FALSE	0.597642962431898	0.7969215553195066	0.7145918489270632
151	LH_Default_Temp	Unclassified	F-F-F	FALSE	FALSE	FALSE	0.4654624630206331	0.89226208683487	0.5135715133541111
152	LH_Default_Temp	Unclassified	F-F-F	FALSE	FALSE	FALSE	0.0649463465579647	0.9477008403928936	0.1391249401040102
153	LH_Default_Temp	Unclassified	F-F-F	FALSE	FALSE	FALSE	0.9445789972990624	0.9493787517038536	0.9832085444391776
154	LH_Default_Temp	Unclassified	F-F-F	FALSE	FALSE	FALSE	0.4453918459000665	0.4518324957930144	0.8251401114924654
155	LH_Default_Temp	Unclassified	F-F-F	FALSE	FALSE	FALSE	0.0674154751108877	0.3605519493439041	0.5103244040102475
156	LH_Default_Temp	No Response	T-F-F	TRUE	FALSE	FALSE	0.0473977483802265	0.2778346196628342	0.7929219290866536
157	LH_Default_Temp	Unclassified	F-F-F	FALSE	FALSE	FALSE	0.4519385015543274	0.2717601963999069	0.5218016648449741
158	LH_Default_Par	Unclassified	F-F-F	FALSE	FALSE	FALSE	0.1709258272292404	0.3868150117874218	0.77076334225948
159	LH_Default_Par	Unclassified	F-F-F	FALSE	FALSE	FALSE	0.8361569172318949	0.7392463471568288	0.89226208683487
160	LH_Default_Par	Compensation	F-T-F	FALSE	TRUE	FALSE	0.9286593311761836	0.0465771479629816	0.3635010248892029
161	LH_Default_Par	Unclassified	F-F-F	FALSE	FALSE	FALSE	0.9493787517038536	0.4747285085246746	0.748094680923711
162	LH_Default_Par	Unclassified	F-F-F	FALSE	FALSE	FALSE	0.7805175061908881	0.9493787517038536	0.8391168538557595
163	LH_Default_Par	Unclassified	F-F-F	FALSE	FALSE	FALSE	0.1072335489741271	0.5054036804095149	0.728030277383653
164	LH_Default_Par	Unclassified	F-F-F	FALSE	FALSE	FALSE	0.7273332190493637	0.680854571492981	0.9286593311761836
165	LH_Default_PFC	Unclassified	F-F-F	FALSE	FALSE	FALSE	0.694220849115549	0.0819648700206573	0.5103244040102475
166	LH_Default_PFC	Unclassified	F-F-F	FALSE	FALSE	FALSE	0.5101462007263533	0.2559224462387922	0.9832085444391776
167	LH_Default_PFC	Unclassified	F-F-F	FALSE	FALSE	FALSE	0.960705709471271	0.9961593043081346	0.960705709471271
168	LH_Default_PFC	Unclassified	F-F-F	FALSE	FALSE	FALSE	0.5476680557288592	0.6636899931080309	0.6937408664377722
169	LH_Default_PFC	Unclassified	F-F-F	FALSE	FALSE	FALSE	0.0705089059522593	0.1072360653856948	0.6254497204186495
170	LH_Default_PFC	Unclassified	F-F-F	FALSE	FALSE	FALSE	0.2608548971579973	0.2905821217505048	0.7165704987953928
171	LH_Default_PFC	Unclassified	F-F-F	FALSE	FALSE	FALSE	0.5087845164271785	0.2195763430572127	0.9961593043081346
172	LH_Default_PFC	Unclassified	F-F-F	FALSE	FALSE	FALSE	0.8361569172318949	0.9013004704365372	0.876522353133522
173	LH_Default_PFC	Unclassified	F-F-F	FALSE	FALSE	FALSE	0.9493787517038536	0.5180002227550158	0.7392463471568288
174	LH_Default_PFC	Compensation	F-T-F	FALSE	TRUE	FALSE	0.0879094155069701	0.0423624985271728	0.8491186801124683
175	LH_Default_PFC	Unclassified	F-F-F	FALSE	FALSE	FALSE	0.5081906438351653	0.5296288623667401	0.9961593043081346
176	LH_Default_PFC	Unclassified	F-F-F	FALSE	FALSE	FALSE	0.2031560936021671	0.5135715133541111	0.8371321550126058
177	LH_Default_PFC	Unclassified	F-F-F	FALSE	FALSE	FALSE	0.6636899931080309	0.869424423577896	0.9493787517038536
178	LH_Default_PFC	Unclassified	F-F-F	FALSE	FALSE	FALSE	0.7969215553195066	0.4973713811213074	0.5754765091351557
179	LH_Default_PFC	Unclassified	F-F-F	FALSE	FALSE	FALSE	0.7700037479352095	0.597642962431898	0.9946897699133656
180	LH_Default_PFC	Unclassified	F-F-F	FALSE	FALSE	FALSE	0.2879955032429339	0.2306643844616004	0.9746095413612088
181	LH_Default_PFC	No Response	T-F-F	TRUE	FALSE	FALSE	0.0075867568997728	0.9961593043081346	0.1154130847576245
182	LH_Default_PFC	Unclassified	F-F-F	FALSE	FALSE	FALSE	0.7387227096451507	0.993342838204998	0.895109962764356
183	LH_Default_PFC	Unclassified	F-F-F	FALSE	FALSE	FALSE	0.2070654601230928	0.8528710504381971	0.6159172488547789
184	LH_Default_PFC	Unclassified	F-F-F	FALSE	FALSE	FALSE	0.4483595012753416	0.5610847196712689	0.6169404916520582
185	LH_Default_PFC	Unclassified	F-F-F	FALSE	FALSE	FALSE	0.1270269200818706	0.3490036579610951	0.8436232843688543
186	LH_Default_PFC	Unclassified	F-F-F	FALSE	FALSE	FALSE	0.3131001854930382	0.6254497204186495	0.9352168766631488
187	LH_Default_PFC	Unclassified	F-F-F	FALSE	FALSE	FALSE	0.3314014425650176	0.669274720410742	0.7795090474901278
188	LH_Default_PFC	Unclassified	F-F-F	FALSE	FALSE	FALSE	0.5180002227550158	0.2287125648332899	0.8234597254417764
189	LH_Default_pCunPCC	Compensation	F-T-F	FALSE	TRUE	FALSE	0.1305880427478201	0.029963839642861	0.9493787517038536
190	LH_Default_pCunPCC	Unclassified	F-F-F	FALSE	FALSE	FALSE	0.0838861112575248	0.0743931351896408	0.7700037479352095
191	LH_Default_pCunPCC	Unclassified	F-F-F	FALSE	FALSE	FALSE	0.1164565173382132	0.0519001197703981	0.9493787517038536
192	LH_Default_pCunPCC	Unclassified	F-F-F	FALSE	FALSE	FALSE	0.0735347997214552	0.0945259062661192	0.840729796833086
193	LH_Default_pCunPCC	Compensation	F-T-F	FALSE	TRUE	FALSE	0.8361569172318949	0.0438471420809663	0.208087898137893
194	LH_Default_pCunPCC	Unclassified	F-F-F	FALSE	FALSE	FALSE	0.6568132095131738	0.1015118554237366	0.8476128659861846
195	LH_Default_pCunPCC	Unclassified	F-F-F	FALSE	FALSE	FALSE	0.6120455859133896	0.0819648700206573	0.636611045190196
196	LH_Default_pCunPCC	Unclassified	F-F-F	FALSE	FALSE	FALSE	0.4724706728913133	0.1120112589523121	0.4819579549532812
197	LH_Default_pCunPCC	Unclassified	F-F-F	FALSE	FALSE	FALSE	0.703943772439481	0.2319152613891245	0.6259125607983259
198	LH_Default_pCunPCC	Unclassified	F-F-F	FALSE	FALSE	FALSE	0.4229707404377011	0.058289756018594	0.4906087516181176
199	LH_Default_pCunPCC	Unclassified	F-F-F	FALSE	FALSE	FALSE	0.2944290830854081	0.3261423768111441	0.8606822957987074
200	RH_Vis_1	Unclassified	F-F-F	FALSE	FALSE	FALSE	0.3363195921614482	0.1571999200619632	0.7342150018664726
201	RH_Vis_2	Compensation	F-T-F	FALSE	TRUE	FALSE	0.5268423808407973	0.0094438808539531	0.5494937256420973
202	RH_Vis_3	Unclassified	F-F-F	FALSE	FALSE	FALSE	0.4046764720012845	0.0519001197703981	0.533662341725368
203	RH_Vis_4	Unclassified	F-F-F	FALSE	FALSE	FALSE	0.5695421205399067	0.1002103879544845	0.5853824756226407
204	RH_Vis_5	Compensation	F-T-F	FALSE	TRUE	FALSE	0.2961181996526011	0.0265091197863811	0.5411530165164428
205	RH_Vis_6	Compensation	F-T-F	FALSE	TRUE	FALSE	0.9961593043081346	0.0236990331694763	0.1747523215656732
206	RH_Vis_7	Unclassified	F-F-F	FALSE	FALSE	FALSE	0.349721986816608	0.0829113935884509	0.8154539161600027
207	RH_Vis_8	Unclassified	F-F-F	FALSE	FALSE	FALSE	0.6268722708751556	0.0879094155069701	0.358861737198988
208	RH_Vis_9	Unclassified	F-F-F	FALSE	FALSE	FALSE	0.9455566946597294	0.4054468920931044	0.5801743628021763
209	RH_Vis_10	Unclassified	F-F-F	FALSE	FALSE	FALSE	0.7392463471568288	0.2573440203609364	0.5665714942776463
210	RH_Vis_11	Compensation	F-T-F	FALSE	TRUE	FALSE	0.3879077781832203	0.0066106390883095	0.6428630914424122
211	RH_Vis_12	Compensation	F-T-F	FALSE	TRUE	FALSE	0.2577730804374374	0.015045927238822	0.3806562565662025
212	RH_Vis_13	Unclassified	F-F-F	FALSE	FALSE	FALSE	0.9961593043081346	0.1654702950716715	0.3617619825847198
213	RH_Vis_14	Compensation	F-T-F	FALSE	TRUE	FALSE	0.2573440203609364	0.0236990331694763	0.5081906438351653
214	RH_Vis_15	Compensation	F-T-F	FALSE	TRUE	FALSE	0.9534263018910952	0.0332032515321691	0.1524918332344825
215	RH_Vis_16	Unclassified	F-F-F	FALSE	FALSE	FALSE	0.9477008403928936	0.3917439614540254	0.5144816008574142
216	RH_Vis_17	Compensation	F-T-F	FALSE	TRUE	FALSE	0.2959940274259134	0.0066106390883095	0.2745445405994395
217	RH_Vis_18	Unclassified	F-F-F	FALSE	FALSE	FALSE	0.777505912640943	0.171898940464236	0.5494937256420973
218	RH_Vis_19	Compensation	F-T-F	FALSE	TRUE	FALSE	0.3423090673006793	0.0094438808539531	0.1980119562826531
219	RH_Vis_20	Compensation	F-T-F	FALSE	TRUE	FALSE	0.1787122392273617	0.0158726382430797	0.3314014425650176
220	RH_Vis_21	Compensation	F-T-F	FALSE	TRUE	FALSE	0.5144816008574142	0.0206209380815269	0.5754765091351557
221	RH_Vis_22	Compensation	F-T-F	FALSE	TRUE	FALSE	0.6159172488547789	0.0157723531659358	0.3363195921614482
222	RH_Vis_23	Compensation	F-T-F	FALSE	TRUE	FALSE	0.9567770385411476	0.0066106390883095	0.1643678764688197
223	RH_Vis_24	Compensation	F-T-F	FALSE	TRUE	FALSE	0.2160513649288939	0.0048526038486127	0.333943702738432
224	RH_Vis_25	Compensation	F-T-F	FALSE	TRUE	FALSE	0.5081298466130741	0.0092933287797982	0.0971020611241482
225	RH_Vis_26	Compensation	F-T-F	FALSE	TRUE	FALSE	0.8083650314914864	0.0094438808539531	0.1343970651252491
226	RH_Vis_27	Compensation	F-T-F	FALSE	TRUE	FALSE	0.9723352553724052	0.0066106390883095	0.1923737127668062
227	RH_Vis_28	Compensation	F-T-F	FALSE	TRUE	FALSE	0.7392463471568288	0.0094438808539531	0.1116793489460628
228	RH_Vis_29	Compensation	F-T-F	FALSE	TRUE	FALSE	0.3621095829394426	0.0056338865877178	0.3423090673006793
229	RH_Vis_30	Compensation	F-T-F	FALSE	TRUE	FALSE	0.349721986816608	0.0075867568997728	0.3455115681392314
230	RH_SomMot_1	Unclassified	F-F-F	FALSE	FALSE	FALSE	0.2303310564397657	0.3363195921614482	0.9547786974912345
231	RH_SomMot_2	Unclassified	F-F-F	FALSE	FALSE	FALSE	0.3431922069384989	0.987824598041226	0.8033462304976878
232	RH_SomMot_3	Unclassified	F-F-F	FALSE	FALSE	FALSE	0.3895561821170277	0.3328062501009102	0.9517728128694014
233	RH_SomMot_4	Unclassified	F-F-F	FALSE	FALSE	FALSE	0.0959921436081649	0.2624897460543424	0.6753807532732832
234	RH_SomMot_5	No Response	T-F-F	TRUE	FALSE	FALSE	0.0473977483802265	0.1772857105774925	0.5498709621426909
235	RH_SomMot_6	Unclassified	F-F-F	FALSE	FALSE	FALSE	0.4973713811213074	0.4926281404810251	0.945641365242426
236	RH_SomMot_7	Unclassified	F-F-F	FALSE	FALSE	FALSE	0.9990745892337748	0.7670009405007016	0.8369598038071323
237	RH_SomMot_8	Unclassified	F-F-F	FALSE	FALSE	FALSE	0.5144816008574142	0.9185365207371362	0.5754765091351557
238	RH_SomMot_9	No Response	T-F-F	TRUE	FALSE	FALSE	0.0483147828350997	0.3724790106658261	0.5978118069129793
239	RH_SomMot_10	Unclassified	F-F-F	FALSE	FALSE	FALSE	0.6479691805375697	0.7580692375471316	0.9634757646951978
240	RH_SomMot_11	Unclassified	F-F-F	FALSE	FALSE	FALSE	0.1020740049121287	0.5087845164271785	0.647521462826238
241	RH_SomMot_12	Unclassified	F-F-F	FALSE	FALSE	FALSE	0.455487533639644	0.3884553524980675	0.7509261776279049
242	RH_SomMot_13	Unclassified	F-F-F	FALSE	FALSE	FALSE	0.1020740049121287	0.197765411229009	0.4819579549532812
243	RH_SomMot_14	Unclassified	F-F-F	FALSE	FALSE	FALSE	0.2319152613891245	0.5941360586680453	0.9251005339586648
244	RH_SomMot_15	No Response	T-F-F	TRUE	FALSE	FALSE	0.019273948774355	0.0621716882947735	0.5978118069129793
245	RH_SomMot_16	No Response	T-F-F	TRUE	FALSE	FALSE	0.0307150853505577	0.1436504356585587	0.6921833746217908
246	RH_SomMot_17	Unclassified	F-F-F	FALSE	FALSE	FALSE	0.1173243795759792	0.1015118554237366	0.8375314648242114
247	RH_SomMot_18	No Response	T-F-F	TRUE	FALSE	FALSE	0.0178966254663181	0.330681257973111	0.1818171661945562
248	RH_SomMot_19	No Response	T-F-F	TRUE	FALSE	FALSE	0.0066106390883095	0.0575786489124965	0.3509698754837452
249	RH_SomMot_20	Unclassified	F-F-F	FALSE	FALSE	FALSE	0.1020740049121287	0.8085677960417339	0.5101462007263533
250	RH_SomMot_21	No Response	T-F-F	TRUE	FALSE	FALSE	0.0207969949352155	0.0793967036220722	0.4434338811213343
251	RH_SomMot_22	No Response	T-F-F	TRUE	FALSE	FALSE	0.02103309255161	0.227720609016457	0.597642962431898
252	RH_SomMot_23	No Response	T-F-F	TRUE	FALSE	FALSE	0.0252498408987935	0.1735342963910465	0.6182686989043766
253	RH_SomMot_24	No Response	T-F-F	TRUE	FALSE	FALSE	0.0328055192712039	0.0735347997214552	0.7306011621074873
254	RH_SomMot_25	Unclassified	F-F-F	FALSE	FALSE	FALSE	0.0735347997214552	0.1020740049121287	0.493835193769456
255	RH_SomMot_26	Compensation	F-T-F	FALSE	TRUE	FALSE	0.0999253980321036	0.0367067865003365	0.9723352553724052
256	RH_SomMot_27	Unclassified	F-F-F	FALSE	FALSE	FALSE	0.2399970373076604	0.0746584048770347	0.8471192427023742
257	RH_SomMot_28	Unclassified	F-F-F	FALSE	FALSE	FALSE	0.1608089109847429	0.0522153289701026	0.7092797161309876
258	RH_SomMot_29	Unclassified	F-F-F	FALSE	FALSE	FALSE	0.2203534782597935	0.1002103879544845	0.8420587973669953
259	RH_SomMot_30	Compensation	F-T-F	FALSE	TRUE	FALSE	0.0735347997214552	0.0207969949352155	0.9286593311761836
260	RH_SomMot_31	Unclassified	F-F-F	FALSE	FALSE	FALSE	0.4229707404377011	0.4819579549532812	0.8739816522438512
261	RH_SomMot_32	Unclassified	F-F-F	FALSE	FALSE	FALSE	0.1015118554237366	0.1083333525817789	0.8490083312993539
262	RH_SomMot_33	Unclassified	F-F-F	FALSE	FALSE	FALSE	0.3273499250723344	0.0812776110432368	0.9301705831230138
263	RH_SomMot_34	Unclassified	F-F-F	FALSE	FALSE	FALSE	0.3457144139223256	0.1457761107878508	0.8722549161750638
264	RH_SomMot_35	Unclassified	F-F-F	FALSE	FALSE	FALSE	0.5103244040102475	0.1072360653856948	0.7695429008790989
265	RH_SomMot_36	Unclassified	F-F-F	FALSE	FALSE	FALSE	0.4592271450486707	0.3879077781832203	0.9090310837898026
266	RH_SomMot_37	Unclassified	F-F-F	FALSE	FALSE	FALSE	0.1010771147978666	0.1945728045769608	0.8154539161600027
267	RH_SomMot_38	Unclassified	F-F-F	FALSE	FALSE	FALSE	0.3485696059754304	0.0670449189337624	0.9990745892337748
268	RH_SomMot_39	Unclassified	F-F-F	FALSE	FALSE	FALSE	0.3605519493439041	0.1020740049121287	0.8512693304650814
269	RH_SomMot_40	Compensation	F-T-F	FALSE	TRUE	FALSE	0.151158156557285	0.0369068742653624	0.9477008403928936
270	RH_DorsAttn_Post	Unclassified	F-F-F	FALSE	FALSE	FALSE	0.3363195921614482	0.2608548971579973	0.5754765091351557
271	RH_DorsAttn_Post	Unclassified	F-F-F	FALSE	FALSE	FALSE	0.5754765091351557	0.7722569662215223	0.9961593043081346
272	RH_DorsAttn_Post	Unclassified	F-F-F	FALSE	FALSE	FALSE	0.4105103313599627	0.3549560445711898	0.6706848971000915
273	RH_DorsAttn_Post	Unclassified	F-F-F	FALSE	FALSE	FALSE	0.1436504356585587	0.0977062746497014	0.6706848971000915
274	RH_DorsAttn_Post	Compensation	F-T-F	FALSE	TRUE	FALSE	0.4483595012753416	0.0201326078446159	0.3605519493439041
275	RH_DorsAttn_Post	Unclassified	F-F-F	FALSE	FALSE	FALSE	0.1577856090492166	0.4377727310466764	0.6428630914424122
276	RH_DorsAttn_Post	Compensation	F-T-F	FALSE	TRUE	FALSE	0.1571999200619632	0.0003030348635978	0.5609608555325637
277	RH_DorsAttn_Post	Unclassified	F-F-F	FALSE	FALSE	FALSE	0.3635010248892029	0.3363195921614482	0.4906087516181176
278	RH_DorsAttn_Post	No Response	T-F-F	TRUE	FALSE	FALSE	0.0408913257887632	0.1057335470282057	0.5081906438351653
279	RH_DorsAttn_Post	Unclassified	F-F-F	FALSE	FALSE	FALSE	0.6534673789949317	0.2573440203609364	0.9043634556786404
280	RH_DorsAttn_Post	Unclassified	F-F-F	FALSE	FALSE	FALSE	0.3131001854930382	0.277548138078079	0.5667551219498781
281	RH_DorsAttn_Post	Compensation	F-T-F	FALSE	TRUE	FALSE	0.2725525101691584	0.0070330977161162	0.5609608555325637
282	RH_DorsAttn_Post	No Response	T-F-F	TRUE	FALSE	FALSE	0.0307150853505577	0.0885827488533125	0.5513810819317322
283	RH_DorsAttn_Post	Compensation	F-T-F	FALSE	TRUE	FALSE	0.0623241440193769	0.0393359840334026	0.5754765091351557
284	RH_DorsAttn_Post	Compensation	F-T-F	FALSE	TRUE	FALSE	0.2160513649288939	0.0408913257887632	0.7458321549291675
285	RH_DorsAttn_Post	Compensation	F-T-F	FALSE	TRUE	FALSE	0.2945360832094537	0.028923789341774	0.8360624589497865
286	RH_DorsAttn_Post	Unclassified	F-F-F	FALSE	FALSE	FALSE	0.1537717782738331	0.0829113935884509	0.7661944904804396
287	RH_DorsAttn_Post	Compensation	F-T-F	FALSE	TRUE	FALSE	0.348753654144215	0.0369068742653624	0.8033462304976878
288	RH_DorsAttn_Post	Unclassified	F-F-F	FALSE	FALSE	FALSE	0.0522153289701026	0.0793967036220722	0.6494866586958323
289	RH_DorsAttn_FEF	No Response	T-F-F	TRUE	FALSE	FALSE	0.029963839642861	0.4749225493388107	0.2573440203609364
290	RH_DorsAttn_FEF	No Response	T-F-F	TRUE	FALSE	FALSE	0.0473977483802265	0.3423090673006793	0.5494937256420973
291	RH_DorsAttn_FEF	Unclassified	F-F-F	FALSE	FALSE	FALSE	0.3261423768111441	0.2725208557933126	0.7555490606796019
292	RH_DorsAttn_PrCv	Unclassified	F-F-F	FALSE	FALSE	FALSE	0.1600422581304388	0.2004923264721781	0.972589193158644
293	RH_SalVentAttn_TempOccPar	Unclassified	F-F-F	FALSE	FALSE	FALSE	0.8739816522438512	0.9748708478285188	0.946052438946531
294	RH_SalVentAttn_TempOccPar	Unclassified	F-F-F	FALSE	FALSE	FALSE	0.4700687703739633	0.7968971778516755	0.6428630914424122
295	RH_SalVentAttn_TempOccPar	Unclassified	F-F-F	FALSE	FALSE	FALSE	0.9090310837898026	0.8573869695847053	0.901671934024424
296	RH_SalVentAttn_TempOccPar	Unclassified	F-F-F	FALSE	FALSE	FALSE	0.7969215553195066	0.222181728198707	0.7969215553195066
297	RH_SalVentAttn_TempOccPar	Unclassified	F-F-F	FALSE	FALSE	FALSE	0.4910619344485371	0.533662341725368	0.9565542126886792
298	RH_SalVentAttn_TempOccPar	Unclassified	F-F-F	FALSE	FALSE	FALSE	0.1225380760443768	0.2319152613891245	0.6051054500732702
299	RH_SalVentAttn_TempOccPar	Unclassified	F-F-F	FALSE	FALSE	FALSE	0.9286593311761836	0.5754765091351557	0.7092797161309876
300	RH_SalVentAttn_PrC	No Response	T-F-F	TRUE	FALSE	FALSE	0.0213527217395991	0.1145366602083932	0.3200569185711103
301	RH_SalVentAttn_FrOperIns	Unclassified	F-F-F	FALSE	FALSE	FALSE	0.509285564538486	0.5476680557288592	0.5249110721286738
302	RH_SalVentAttn_FrOperIns	Unclassified	F-F-F	FALSE	FALSE	FALSE	0.5308664596564109	0.6051054500732702	0.694220849115549
303	RH_SalVentAttn_FrOperIns	Unclassified	F-F-F	FALSE	FALSE	FALSE	0.4747285085246746	0.9121589582461372	0.7575081953680735
304	RH_SalVentAttn_FrOperIns	No Response	T-F-F	TRUE	FALSE	FALSE	0.0323318459069338	0.1598562787960286	0.4169412216190553
305	RH_SalVentAttn_FrOperIns	Unclassified	F-F-F	FALSE	FALSE	FALSE	0.3534183880375233	0.4046764720012845	0.9251005339586648
306	RH_SalVentAttn_FrOperIns	No Response	T-F-F	TRUE	FALSE	FALSE	0.0457737143198168	0.1945728045769608	0.6354915449907552
307	RH_SalVentAttn_FrOperIns	Unclassified	F-F-F	FALSE	FALSE	FALSE	0.2113891546630997	0.0580435917273466	0.5941360586680453
308	RH_SalVentAttn_FrOperIns	Unclassified	F-F-F	FALSE	FALSE	FALSE	0.7342150018664726	0.3677361675136225	0.6369559301994085
309	RH_SalVentAttn_PFCl	Unclassified	F-F-F	FALSE	FALSE	FALSE	0.1305880427478201	0.1524918332344825	0.7587745813658551
310	RH_SalVentAttn_Med	Unclassified	F-F-F	FALSE	FALSE	FALSE	0.1010771147978666	0.1020740049121287	0.9709160961475022
311	RH_SalVentAttn_Med	Unclassified	F-F-F	FALSE	FALSE	FALSE	0.2573440203609364	0.5101462007263533	0.9478506350431436
312	RH_SalVentAttn_Med	Unclassified	F-F-F	FALSE	FALSE	FALSE	0.1305880427478201	0.3534183880375233	0.9493787517038536
313	RH_SalVentAttn_Med	Unclassified	F-F-F	FALSE	FALSE	FALSE	0.1020740049121287	0.1404180226118118	0.92110277833849
314	RH_SalVentAttn_Med	Unclassified	F-F-F	FALSE	FALSE	FALSE	0.1945728045769608	0.3144872011362991	0.5861619055121566
315	RH_SalVentAttn_Med	Unclassified	F-F-F	FALSE	FALSE	FALSE	0.1020740049121287	0.0659972429575356	0.869424423577896
316	RH_SalVentAttn_Med	Unclassified	F-F-F	FALSE	FALSE	FALSE	0.5128567117906473	0.3958043469419232	0.974170196570573
317	RH_SalVentAttn_Med	Unclassified	F-F-F	FALSE	FALSE	FALSE	0.4434338811213343	0.1952862484669593	0.974160054082276
318	RH_Limbic_OFC	Unclassified	F-F-F	FALSE	FALSE	FALSE	0.944647890414008	0.1654702950716715	0.6294498294730668
319	RH_Limbic_OFC	Compensation	F-T-F	FALSE	TRUE	FALSE	0.0959921436081649	0.029963839642861	0.7774417946764121
320	RH_Limbic_OFC	Unclassified	F-F-F	FALSE	FALSE	FALSE	0.2454194328210385	0.2959940274259134	0.6268722708751556
321	RH_Limbic_OFC	Unclassified	F-F-F	FALSE	FALSE	FALSE	0.6984610355903086	0.3485696059754304	0.5268423808407973
322	RH_Limbic_OFC	Compensation	F-T-F	FALSE	TRUE	FALSE	0.8739816522438512	0.0198007544031811	0.6051054500732702
323	RH_Limbic_OFC	Unclassified	F-F-F	FALSE	FALSE	FALSE	0.3363195921614482	0.260390037684202	0.8573821827629818
324	RH_Limbic_TempPole	Unclassified	F-F-F	FALSE	FALSE	FALSE	0.1721974592320889	0.1654702950716715	0.8384272577172656
325	RH_Limbic_TempPole	Unclassified	F-F-F	FALSE	FALSE	FALSE	0.9493787517038536	0.944647890414008	0.8693995048253468
326	RH_Limbic_TempPole	Unclassified	F-F-F	FALSE	FALSE	FALSE	0.2213943961843547	0.5474230850285291	0.4924292331022599
327	RH_Limbic_TempPole	Unclassified	F-F-F	FALSE	FALSE	FALSE	0.78807169589754	0.197765411229009	0.7112063609746789
328	RH_Limbic_TempPole	Unclassified	F-F-F	FALSE	FALSE	FALSE	0.9013004704365372	0.2703514765375619	0.9832085444391776
329	RH_Limbic_TempPole	Compensation	F-T-F	FALSE	TRUE	FALSE	0.8361569172318949	0.0178966254663181	0.1709258272292404
330	RH_Limbic_TempPole	Compensation	F-T-F	FALSE	TRUE	FALSE	0.9470993205638416	0.0096192829753301	0.1475635737788387
331	RH_Cont_Par	Unclassified	F-F-F	FALSE	FALSE	FALSE	0.9426009139345836	0.9910731120338504	0.895109962764356
332	RH_Cont_Par	Unclassified	F-F-F	FALSE	FALSE	FALSE	0.9723352553724052	0.9493787517038536	0.9493787517038536
333	RH_Cont_Par	Compensation	F-T-F	FALSE	TRUE	FALSE	0.993342838204998	0.0381267889637019	0.3423090673006793
334	RH_Cont_Par	Unclassified	F-F-F	FALSE	FALSE	FALSE	0.208087898137893	0.8790540119799564	0.3144872011362991
335	RH_Cont_Par	Unclassified	F-F-F	FALSE	FALSE	FALSE	0.5522312467459554	0.4136312842387878	0.9679945588363555
336	RH_Cont_Par	Unclassified	F-F-F	FALSE	FALSE	FALSE	0.6369559301994085	0.9097032320749168	0.5268423808407973
337	RH_Cont_Temp	Unclassified	F-F-F	FALSE	FALSE	FALSE	0.7713452738759233	0.1709258272292404	0.6745903372233277
338	RH_Cont_Temp	Unclassified	F-F-F	FALSE	FALSE	FALSE	0.9877906408314908	0.1661385125618641	0.5103244040102475
339	RH_Cont_PFCv	Unclassified	F-F-F	FALSE	FALSE	FALSE	0.5494937256420973	0.5140038032775692	0.8723456237933714
340	RH_Cont_PFCl	Unclassified	F-F-F	FALSE	FALSE	FALSE	0.993342838204998	0.0621716882947735	0.4406593137063421
341	RH_Cont_PFCl	Unclassified	F-F-F	FALSE	FALSE	FALSE	0.5754765091351557	0.0977062746497014	0.7575081953680735
342	RH_Cont_PFCl	Unclassified	F-F-F	FALSE	FALSE	FALSE	0.5494937256420973	0.703943772439481	0.9748708478285188
343	RH_Cont_PFCl	Unclassified	F-F-F	FALSE	FALSE	FALSE	0.1175042836945147	0.9350367610789136	0.1153727429113193
344	RH_Cont_PFCl	Unclassified	F-F-F	FALSE	FALSE	FALSE	0.9000408323433657	0.6638148253346805	0.9445789972990624
345	RH_Cont_PFCl	Unclassified	F-F-F	FALSE	FALSE	FALSE	0.4434338811213343	0.6896797590202433	0.6685256259103296
346	RH_Cont_PFCl	Unclassified	F-F-F	FALSE	FALSE	FALSE	0.8007544496692021	0.866753891399609	0.4914253415205118
347	RH_Cont_PFCl	Unclassified	F-F-F	FALSE	FALSE	FALSE	0.1180172440888158	0.0829113935884509	0.8630093279854704
348	RH_Cont_PFCl	Unclassified	F-F-F	FALSE	FALSE	FALSE	0.6745903372233277	0.4169412216190553	0.9100952794993004
349	RH_Cont_PFCl	Unclassified	F-F-F	FALSE	FALSE	FALSE	0.5296288623667401	0.5147504858427064	0.9723352553724052
350	RH_Cont_PFCl	Unclassified	F-F-F	FALSE	FALSE	FALSE	0.4700687703739633	0.6159172488547789	0.4819579549532812
351	RH_Cont_PFCl	Unclassified	F-F-F	FALSE	FALSE	FALSE	0.1952862484669593	0.9493787517038536	0.3891712876227071
352	RH_Cont_PFCl	Unclassified	F-F-F	FALSE	FALSE	FALSE	0.0580435917273466	0.65832738077659	0.2147409674590846
353	RH_Cont_PFCl	Unclassified	F-F-F	FALSE	FALSE	FALSE	0.8981428739008327	0.7593291292800338	0.8360624589497865
354	RH_Cont_PFCl	Unclassified	F-F-F	FALSE	FALSE	FALSE	0.3530495039971955	0.3917439614540254	0.9286593311761836
355	RH_Cont_pCun	Unclassified	F-F-F	FALSE	FALSE	FALSE	0.1346245449909676	0.0605253353390139	0.9567770385411476
356	RH_Cont_pCun	Unclassified	F-F-F	FALSE	FALSE	FALSE	0.3530495039971955	0.1510258554504437	0.910793954234426
357	RH_Cont_Cing	Unclassified	F-F-F	FALSE	FALSE	FALSE	0.1654702950716715	0.1020740049121287	0.8024430708220777
358	RH_Cont_Cing	Unclassified	F-F-F	FALSE	FALSE	FALSE	0.5101462007263533	0.208087898137893	0.9961593043081346
359	RH_Cont_PFCmp	Unclassified	F-F-F	FALSE	FALSE	FALSE	0.5308664596564109	0.4094075371516466	0.9493787517038536
360	RH_Cont_PFCmp	Unclassified	F-F-F	FALSE	FALSE	FALSE	0.1524918332344825	0.1728296933207178	0.5087845164271785
361	RH_Default_Par	Unclassified	F-F-F	FALSE	FALSE	FALSE	0.7458321549291675	0.9748708478285188	0.9090310837898026
362	RH_Default_Par	Unclassified	F-F-F	FALSE	FALSE	FALSE	0.4348685461085944	0.2360251152615909	0.8473151313749183
363	RH_Default_Par	Unclassified	F-F-F	FALSE	FALSE	FALSE	0.5754765091351557	0.9493787517038536	0.5474230850285291
364	RH_Default_Par	Unclassified	F-F-F	FALSE	FALSE	FALSE	0.6953459808525375	0.3602081297806039	0.4939345402614614
365	RH_Default_Par	Unclassified	F-F-F	FALSE	FALSE	FALSE	0.4229707404377011	0.9805544308290456	0.3131001854930382
366	RH_Default_Temp	Unclassified	F-F-F	FALSE	FALSE	FALSE	0.9961593043081346	0.4747285085246746	0.7141282249929717
367	RH_Default_Temp	Unclassified	F-F-F	FALSE	FALSE	FALSE	0.5160538247409743	0.4700687703739633	0.1707278871848119
368	RH_Default_Temp	Unclassified	F-F-F	FALSE	FALSE	FALSE	0.5548330645769128	0.8558846267412413	0.7700037479352095
369	RH_Default_Temp	Unclassified	F-F-F	FALSE	FALSE	FALSE	0.1363590479092035	0.9534996686155164	0.4787446677748637
370	RH_Default_Temp	Unclassified	F-F-F	FALSE	FALSE	FALSE	0.9961593043081346	0.8083650314914864	0.9690909587336454
371	RH_Default_Temp	Unclassified	F-F-F	FALSE	FALSE	FALSE	0.6745903372233277	0.945641365242426	0.9473033130897964
372	RH_Default_Temp	Unclassified	F-F-F	FALSE	FALSE	FALSE	0.3455115681392314	0.5268423808407973	0.9043634556786404
373	RH_Default_Temp	Unclassified	F-F-F	FALSE	FALSE	FALSE	0.7593291292800338	0.7996900201228816	0.9993361881560454
374	RH_Default_PFCv	Unclassified	F-F-F	FALSE	FALSE	FALSE	0.3580125680714906	0.4289563338009973	0.7273332190493637
375	RH_Default_PFCv	Unclassified	F-F-F	FALSE	FALSE	FALSE	0.636836563214678	0.2245529935615348	0.9961593043081346
376	RH_Default_PFCv	Unclassified	F-F-F	FALSE	FALSE	FALSE	0.3363195921614482	0.9832085444391776	0.4054468920931044
377	RH_Default_PFCv	Unclassified	F-F-F	FALSE	FALSE	FALSE	0.7575081953680735	0.1594365467816323	0.5754765091351557
378	RH_Default_PFCdPFCm	Unclassified	F-F-F	FALSE	FALSE	FALSE	0.8156876806385022	0.6573921907284741	0.8024430708220777
379	RH_Default_PFCdPFCm	Unclassified	F-F-F	FALSE	FALSE	FALSE	0.7516743096811875	0.7549903226542074	0.6964851145722892
380	RH_Default_PFCdPFCm	Unclassified	F-F-F	FALSE	FALSE	FALSE	0.9884891030949254	0.330681257973111	0.6745903372233277
381	RH_Default_PFCdPFCm	Unclassified	F-F-F	FALSE	FALSE	FALSE	0.9353173970558466	0.70169301694056	0.7273332190493637
382	RH_Default_PFCdPFCm	Unclassified	F-F-F	FALSE	FALSE	FALSE	0.7078391254277284	0.5144816008574142	0.8476128659861846
383	RH_Default_PFCdPFCm	No Response	T-F-F	TRUE	FALSE	FALSE	0.0066106390883095	0.3200569185711103	0.1072360653856948
384	RH_Default_PFCdPFCm	Unclassified	F-F-F	FALSE	FALSE	FALSE	0.9528624282178416	0.9097032320749168	0.891996478693577
385	RH_Default_PFCdPFCm	Unclassified	F-F-F	FALSE	FALSE	FALSE	0.1728296933207178	0.348753654144215	0.597642962431898
386	RH_Default_PFCdPFCm	Unclassified	F-F-F	FALSE	FALSE	FALSE	0.4719019466803044	0.9397954713357436	0.5327554258658649
387	RH_Default_PFCdPFCm	Unclassified	F-F-F	FALSE	FALSE	FALSE	0.0705089059522593	0.3605519493439041	0.3779086099522029
388	RH_Default_PFCdPFCm	Unclassified	F-F-F	FALSE	FALSE	FALSE	0.4725277312145422	0.4910619344485371	0.9961593043081346
389	RH_Default_PFCdPFCm	Unclassified	F-F-F	FALSE	FALSE	FALSE	0.3868150117874218	0.972589193158644	0.7509261776279049
390	RH_Default_PFCdPFCm	Unclassified	F-F-F	FALSE	FALSE	FALSE	0.1798468888824693	0.0944115929319642	0.9955813158342308
391	RH_Default_pCunPCC	Compensation	F-T-F	FALSE	TRUE	FALSE	0.0741819141743219	0.0178966254663181	0.7774417946764121
392	RH_Default_pCunPCC	Normalization	T-T-F	TRUE	TRUE	FALSE	0.019273948774355	0.015948083399937	0.9013004704365372
393	RH_Default_pCunPCC	Unclassified	F-F-F	FALSE	FALSE	FALSE	0.0971020611241482	0.1024029345579543	0.8361569172318949
394	RH_Default_pCunPCC	Unclassified	F-F-F	FALSE	FALSE	FALSE	0.2004923264721781	0.1305880427478201	0.9496824919719816
395	RH_Default_pCunPCC	Compensation	F-T-F	FALSE	TRUE	FALSE	0.5118571809904909	0.0446441104897396	0.7392463471568288
396	RH_Default_pCunPCC	Compensation	F-T-F	FALSE	TRUE	FALSE	0.1252656618539375	0.0178966254663181	0.5494937256420973
397	RH_Default_pCunPCC	Unclassified	F-F-F	FALSE	FALSE	FALSE	0.1923737127668062	0.1083027375173869	0.6808505461550848
398	RH_Default_pCunPCC	Unclassified	F-F-F	FALSE	FALSE	FALSE	0.5379826140084097	0.3724790106658261	0.7525683556590329
399	RH_Default_pCunPCC	Unclassified	F-F-F	FALSE	FALSE	FALSE	0.0659972429575356	0.1945728045769608	0.3779086099522029
133	HC vs TNpost (indep)	-0.518835	0.6052212207374518	0.7795090474901278	FALSE	7Networks_LH_Cont_OFC_1
133	TNpre vs TNpost (paired)	-2.64508	0.011810184824816772	0.08291139358845091	FALSE	7Networks_LH_Cont_OFC_1
134	HC vs TNpre (indep)	0.6501500263194828	0.5172360595300663	0.7208864941185593	FALSE	7Networks_LH_Cont_PFCl_1
134	HC vs TNpost (indep)	-0.126957	0.8992736057808192	0.9566740487029992	FALSE	7Networks_LH_Cont_PFCl_1
134	TNpre vs TNpost (paired)	-1.5755	0.12343196325441544	0.32734992507233446	FALSE	7Networks_LH_Cont_PFCl_1
135	HC vs TNpre (indep)	1.6411631717523085	0.10445673582933489	0.2921866736484892	FALSE	7Networks_LH_Cont_PFCl_2
135	HC vs TNpost (indep)	1.1758715554012602	0.24289698650028893	0.4725277312145422	FALSE	7Networks_LH_Cont_PFCl_2
135	TNpre vs TNpost (paired)	-1.08775	0.2835562632370647	0.5101462007263533	FALSE	7Networks_LH_Cont_PFCl_2
136	HC vs TNpre (indep)	1.645075488395066	0.10409012394073482	0.2918414689927144	FALSE	7Networks_LH_Cont_PFCl_3
136	HC vs TNpost (indep)	0.9858085962270251	0.32699439691801147	0.5476680557288592	FALSE	7Networks_LH_Cont_PFCl_3
136	TNpre vs TNpost (paired)	-1.27823	0.20891969034128646	0.42928703494784887	FALSE	7Networks_LH_Cont_PFCl_3
137	HC vs TNpre (indep)	1.687271257612893	0.09576701352520073	0.2742730697619114	FALSE	7Networks_LH_Cont_PFCl_4
137	HC vs TNpost (indep)	0.24653320304514822	0.8059181786283507	0.9140848906937814	FALSE	7Networks_LH_Cont_PFCl_4
137	TNpre vs TNpost (paired)	-1.56241	0.12648122641564236	0.33068125797311104	FALSE	7Networks_LH_Cont_PFCl_4
138	HC vs TNpre (indep)	1.5336685044444671	0.12882818807270788	0.3328062501009102	FALSE	7Networks_LH_Cont_PFCl_5
138	HC vs TNpost (indep)	0.2040579380318254	0.838790493115979	0.9354540815419841	FALSE	7Networks_LH_Cont_PFCl_5
138	TNpre vs TNpost (paired)	-1.90015	0.06502149479519785	0.21088052366010113	FALSE	7Networks_LH_Cont_PFCl_5
139	HC vs TNpre (indep)	1.7226962478884702	0.08823195754261737	0.2601433637620168	FALSE	7Networks_LH_Cont_PFCl_6
139	HC vs TNpost (indep)	-0.0122308	0.9902699556479906	0.9961593043081346	FALSE	7Networks_LH_Cont_PFCl_6
139	TNpre vs TNpost (paired)	-2.32506	0.025508795281332	0.12253807604437682	FALSE	7Networks_LH_Cont_PFCl_6
140	HC vs TNpre (indep)	1.052203456704586	0.2962049354837673	0.5180002227550158	FALSE	7Networks_LH_Cont_PFCl_7
140	HC vs TNpost (indep)	0.6151222143008722	0.540195215806013	0.7387227096451507	FALSE	7Networks_LH_Cont_PFCl_7
140	TNpre vs TNpost (paired)	-0.742177	0.46254306502332354	0.6706848971000915	FALSE	7Networks_LH_Cont_PFCl_7
141	HC vs TNpre (indep)	2.6551811651186426	0.009485124736679212	0.07439313518964087	FALSE	7Networks_LH_Cont_PFCl_8
141	HC vs TNpost (indep)	1.2561715833510338	0.2124576109031034	0.43506678000635507	FALSE	7Networks_LH_Cont_PFCl_8
141	TNpre vs TNpost (paired)	-0.927562	0.35948940998559487	0.5754765091351557	FALSE	7Networks_LH_Cont_PFCl_8
142	HC vs TNpre (indep)	1.0278018523729955	0.3067281073554457	0.5268423808407973	FALSE	7Networks_LH_Cont_PFCv_1
142	HC vs TNpost (indep)	0.2821896455238901	0.7784788462973646	0.9013004704365373	FALSE	7Networks_LH_Cont_PFCv_1
142	TNpre vs TNpost (paired)	-2.04788	0.04752816566319742	0.17282969332071788	FALSE	7Networks_LH_Cont_PFCv_1
143	HC vs TNpre (indep)	1.8935848177862988	0.061449717699868824	0.20426498958405148	FALSE	7Networks_LH_Cont_pCun_1
143	HC vs TNpost (indep)	-0.797619	0.42749406612530805	0.6369559301994085	FALSE	7Networks_LH_Cont_pCun_1
143	TNpre vs TNpost (paired)	-4.34567	9.997156428837023e-05	0.007997725143069618	TRUE	7Networks_LH_Cont_pCun_1
144	HC vs TNpre (indep)	1.9724045049031738	0.05162675237283341	0.18329024511065115	FALSE	7Networks_LH_Cont_pCun_2
144	HC vs TNpost (indep)	-0.118752	0.9057507073285064	0.960705709471271	FALSE	7Networks_LH_Cont_pCun_2
144	TNpre vs TNpost (paired)	-3.37789	0.0016982182235681308	0.028923789341774073	TRUE	7Networks_LH_Cont_pCun_2
145	HC vs TNpre (indep)	1.2541271753067715	0.21305945114302446	0.4355559478221965	FALSE	7Networks_LH_Cont_Cing_1
145	HC vs TNpost (indep)	-0.0546152	0.9565717328806116	0.9870043675466328	FALSE	7Networks_LH_Cont_Cing_1
145	TNpre vs TNpost (paired)	-2.12655	0.04001056453260972	0.16004225813043887	FALSE	7Networks_LH_Cont_Cing_1
146	HC vs TNpre (indep)	2.0169143450630473	0.04626946480829021	0.17189894046423607	FALSE	7Networks_LH_Cont_Cing_2
146	HC vs TNpost (indep)	-0.116073	0.9078741587417558	0.9607133954939215	FALSE	7Networks_LH_Cont_Cing_2
146	TNpre vs TNpost (paired)	-2.05272	0.04703273441951589	0.1725971905303335	FALSE	7Networks_LH_Cont_Cing_2
147	HC vs TNpre (indep)	3.990871587199323	0.00014040391183913102	0.009012905630646011	TRUE	7Networks_LH_Cont_PFCmp_1
147	HC vs TNpost (indep)	3.4939055025691976	0.0007548963269955743	0.019273948774355086	TRUE	7Networks_LH_Cont_PFCmp_1
147	TNpre vs TNpost (paired)	-1.14334	0.26005012964579083	0.4906087516181176	FALSE	7Networks_LH_Cont_PFCmp_1
148	HC vs TNpre (indep)	-0.27874	0.7811537805011586	0.9013004704365373	FALSE	7Networks_LH_Default_Temp_1
148	HC vs TNpost (indep)	-1.09196	0.2779309067795962	0.5081906438351653	FALSE	7Networks_LH_Default_Temp_1
148	TNpre vs TNpost (paired)	-0.474221	0.638056298848212	0.8038752025705808	FALSE	7Networks_LH_Default_Temp_1
149	HC vs TNpre (indep)	0.040109365121740986	0.9680925507034484	0.9920675156653612	FALSE	7Networks_LH_Default_Temp_2
149	HC vs TNpost (indep)	-0.461383	0.6456884825590047	0.8096407304815106	FALSE	7Networks_LH_Default_Temp_2
149	TNpre vs TNpost (paired)	-0.343276	0.7332830208075958	0.869424423577896	FALSE	7Networks_LH_Default_Temp_2
150	HC vs TNpre (indep)	-0.873854	0.384483639164521	0.597642962431898	FALSE	7Networks_LH_Default_Temp_3
150	HC vs TNpost (indep)	-0.659236	0.5115286651902894	0.7145918489270632	FALSE	7Networks_LH_Default_Temp_3
150	TNpre vs TNpost (paired)	-0.491691	0.6257660244319547	0.7969215553195066	FALSE	7Networks_LH_Default_Temp_3
151	HC vs TNpre (indep)	1.193053462331012	0.2362221999829713	0.46546246302063315	FALSE	7Networks_LH_Default_Temp_4
151	HC vs TNpost (indep)	1.065531286024058	0.2896433245433442	0.5135715133541111	FALSE	7Networks_LH_Default_Temp_4
151	TNpre vs TNpost (paired)	0.3028873819198583	0.7636276359828429	0.89226208683487	FALSE	7Networks_LH_Default_Temp_4
152	HC vs TNpre (indep)	2.753969990687642	0.007067330826311609	0.06494634655796473	FALSE	7Networks_LH_Default_Temp_5
152	HC vs TNpost (indep)	2.1875885885003763	0.03141904897348899	0.13912494010401028	FALSE	7Networks_LH_Default_Temp_5
152	TNpre vs TNpost (paired)	-0.170631	0.8654192344314782	0.9477008403928937	FALSE	7Networks_LH_Default_Temp_5
153	HC vs TNpre (indep)	0.19013258129843538	0.8496376158018324	0.9445789972990623	FALSE	7Networks_LH_Default_Temp_6
153	HC vs TNpost (indep)	-0.0604129	0.9519678669533687	0.9832085444391776	FALSE	7Networks_LH_Default_Temp_6
153	TNpre vs TNpost (paired)	0.16131279341976798	0.8727016578298825	0.9493787517038536	FALSE	7Networks_LH_Default_Temp_6
154	HC vs TNpre (indep)	1.231780034799125	0.22158244333528307	0.4453918459000665	FALSE	7Networks_LH_Default_Temp_7
154	HC vs TNpost (indep)	0.4355836855195805	0.6642377897514347	0.8251401114924654	FALSE	7Networks_LH_Default_Temp_7
154	TNpre vs TNpost (paired)	-1.22787	0.2270458291359897	0.4518324957930144	FALSE	7Networks_LH_Default_Temp_7
155	HC vs TNpre (indep)	2.7186540994893416	0.0078651387629369	0.06741547511088772	FALSE	7Networks_LH_Default_Temp_8
155	HC vs TNpost (indep)	1.0752559939425745	0.2852794888790886	0.5103244040102475	FALSE	7Networks_LH_Default_Temp_8
155	TNpre vs TNpost (paired)	-1.4384	0.1585050908771117	0.36055194934390417	FALSE	7Networks_LH_Default_Temp_8
156	HC vs TNpre (indep)	2.9323557310023514	0.004178178552745716	0.04739774838022653	TRUE	7Networks_LH_Default_Temp_9
156	HC vs TNpost (indep)	0.4979470720492149	0.6198006412360675	0.7929219290866536	FALSE	7Networks_LH_Default_Temp_9
156	TNpre vs TNpost (paired)	-1.69789	0.09770517458143002	0.2778346196628342	FALSE	7Networks_LH_Default_Temp_9
157	HC vs TNpre (indep)	1.2150430630723872	0.22747571244901144	0.4519385015543274	FALSE	7Networks_LH_Default_Temp_10
157	HC vs TNpost (indep)	-1.04277	0.30003595728586013	0.5218016648449741	FALSE	7Networks_LH_Default_Temp_10
157	TNpre vs TNpost (paired)	-1.7202	0.09353080092763465	0.27176019639990695	FALSE	7Networks_LH_Default_Temp_10
158	HC vs TNpre (indep)	2.027868101193975	0.045465925757738286	0.17092582722924043	FALSE	7Networks_LH_Default_Par_1
158	HC vs TNpost (indep)	0.5406158451779289	0.5901845222736906	0.77076334225948	FALSE	7Networks_LH_Default_Par_1
158	TNpre vs TNpost (paired)	-1.37785	0.17631030430320507	0.3868150117874218	FALSE	7Networks_LH_Default_Par_1
159	HC vs TNpre (indep)	0.4179536998595071	0.6769852403195059	0.8361569172318949	FALSE	7Networks_LH_Default_Par_2
159	HC vs TNpost (indep)	-0.301695	0.763613270574214	0.89226208683487	FALSE	7Networks_LH_Default_Par_2
159	TNpre vs TNpost (paired)	-0.614594	0.5424858652847414	0.7392463471568288	FALSE	7Networks_LH_Default_Par_2
160	HC vs TNpre (indep)	0.2175363327506718	0.8282395670911512	0.9286593311761836	FALSE	7Networks_LH_Default_Par_3
160	HC vs TNpost (indep)	-1.41094	0.16191713627724244	0.3635010248892029	FALSE	7Networks_LH_Default_Par_3
160	TNpre vs TNpost (paired)	-3.06092	0.004036686156791745	0.046577147962981666	TRUE	7Networks_LH_Default_Par_3
161	HC vs TNpre (indep)	-0.147936	0.8826399143681842	0.9493787517038536	FALSE	7Networks_LH_Default_Par_4
161	HC vs TNpost (indep)	-0.595257	0.5534199669806997	0.748094680923711	FALSE	7Networks_LH_Default_Par_4
161	TNpre vs TNpost (paired)	-1.17613	0.2468588244328308	0.47472850852467463	FALSE	7Networks_LH_Default_Par_4
162	HC vs TNpre (indep)	0.5163149250065566	0.6068523610634154	0.7805175061908881	FALSE	7Networks_LH_Default_Par_5
162	HC vs TNpost (indep)	0.4057089564799374	0.6859780280270834	0.8391168538557595	FALSE	7Networks_LH_Default_Par_5
162	TNpre vs TNpost (paired)	-0.152313	0.8797462705739786	0.9493787517038536	FALSE	7Networks_LH_Default_Par_5
163	HC vs TNpre (indep)	2.372912184226228	0.01974884526940174	0.1072335489741271	FALSE	7Networks_LH_Default_Par_6
163	HC vs TNpost (indep)	0.6367279900039693	0.5260018754096893	0.728030277383653	FALSE	7Networks_LH_Default_Par_6
163	TNpre vs TNpost (paired)	-1.10951	0.27418149662216185	0.5054036804095149	FALSE	7Networks_LH_Default_Par_6
164	HC vs TNpre (indep)	0.6383911963399134	0.5248571951106128	0.7273332190493637	FALSE	7Networks_LH_Default_Par_7
164	HC vs TNpost (indep)	0.21834270725038796	0.8276794180582724	0.9286593311761836	FALSE	7Networks_LH_Default_Par_7
164	TNpre vs TNpost (paired)	-0.723569	0.47376130599719923	0.680854571492981	FALSE	7Networks_LH_Default_Par_7
165	HC vs TNpre (indep)	0.6987045076218092	0.48653311175514724	0.694220849115549	FALSE	7Networks_LH_Default_PFC_1
165	HC vs TNpost (indep)	-1.0771	0.2844852720778262	0.5103244040102475	FALSE	7Networks_LH_Default_PFC_1
165	TNpre vs TNpost (paired)	-2.65903	0.01140677774454148	0.08196487002065735	FALSE	7Networks_LH_Default_PFC_1
166	HC vs TNpre (indep)	1.0831755478665615	0.2823327860806361	0.5101462007263533	FALSE	7Networks_LH_Default_PFC_2
166	HC vs TNpost (indep)	0.061958313174275054	0.9507426153348504	0.9832085444391776	FALSE	7Networks_LH_Default_PFC_2
166	TNpre vs TNpost (paired)	-1.76797	0.08509421337439843	0.25592244623879223	FALSE	7Networks_LH_Default_PFC_2
167	HC vs TNpre (indep)	-0.117113	0.9070663073591251	0.960705709471271	FALSE	7Networks_LH_Default_PFC_3
167	HC vs TNpost (indep)	0.11805327866540566	0.9063014113745209	0.960705709471271	FALSE	7Networks_LH_Default_PFC_3
167	TNpre vs TNpost (paired)	-0.0116375	0.9907757124409917	0.9961593043081346	FALSE	7Networks_LH_Default_PFC_3
168	HC vs TNpre (indep)	0.983213331149633	0.3286008334373155	0.5476680557288592	FALSE	7Networks_LH_Default_PFC_4
168	HC vs TNpost (indep)	0.7012496895038302	0.48504048911774245	0.6937408664377722	FALSE	7Networks_LH_Default_PFC_4
168	TNpre vs TNpost (paired)	-0.755851	0.45439884527694974	0.6636899931080309	FALSE	7Networks_LH_Default_PFC_4
169	HC vs TNpre (indep)	2.68643149064314	0.008343553871017356	0.07050890595225934	FALSE	7Networks_LH_Default_PFC_5
169	HC vs TNpost (indep)	0.8254927586296139	0.41141634724810394	0.6254497204186495	FALSE	7Networks_LH_Default_PFC_5
169	TNpre vs TNpost (paired)	-2.42263	0.02028400660710862	0.10723606538569486	FALSE	7Networks_LH_Default_PFC_5
170	HC vs TNpre (indep)	1.7170466570808716	0.08912542319564909	0.2608548971579973	FALSE	7Networks_LH_Default_PFC_6
170	HC vs TNpost (indep)	0.6560985656130787	0.5135421908033648	0.7165704987953928	FALSE	7Networks_LH_Default_PFC_6
170	TNpre vs TNpost (paired)	-1.66896	0.10334544099772927	0.29058212175050485	FALSE	7Networks_LH_Default_PFC_6
171	HC vs TNpre (indep)	1.0872031195085976	0.2802554711319708	0.5087845164271785	FALSE	7Networks_LH_Default_PFC_7
171	HC vs TNpost (indep)	-0.0254691	0.979742128459369	0.9961593043081346	FALSE	7Networks_LH_Default_PFC_7
171	TNpre vs TNpost (paired)	-1.87154	0.068983567777141	0.21957634305721274	FALSE	7Networks_LH_Default_PFC_7
172	HC vs TNpre (indep)	0.4164648504792193	0.6780575551336012	0.8361569172318949	FALSE	7Networks_LH_Default_PFC_8
172	HC vs TNpost (indep)	0.32550455900182174	0.7455902081014035	0.876522353133522	FALSE	7Networks_LH_Default_PFC_8
172	TNpre vs TNpost (paired)	-0.278532	0.7821138961768377	0.9013004704365373	FALSE	7Networks_LH_Default_PFC_8
173	HC vs TNpre (indep)	-0.148757	0.882076920804407	0.9493787517038536	FALSE	7Networks_LH_Default_PFC_9
173	HC vs TNpost (indep)	-0.609255	0.5439621037828999	0.7392463471568288	FALSE	7Networks_LH_Default_PFC_9
173	TNpre vs TNpost (paired)	-1.05837	0.2965686275538688	0.5180002227550158	FALSE	7Networks_LH_Default_PFC_9
174	HC vs TNpre (indep)	2.534616109393913	0.012775265794640495	0.08790941550697019	FALSE	7Networks_LH_Default_PFC_10
174	HC vs TNpost (indep)	0.3820761798242356	0.7033533066931612	0.8491186801124683	FALSE	7Networks_LH_Default_PFC_10
174	TNpre vs TNpost (paired)	-3.12223	0.0034243019642798077	0.04236249852717288	TRUE	7Networks_LH_Default_PFC_10
175	HC vs TNpre (indep)	1.0893848506747903	0.27848224504415314	0.5081906438351653	FALSE	7Networks_LH_Default_PFC_11
175	HC vs TNpost (indep)	-0.00908797	0.9927709461911852	0.9961593043081346	FALSE	7Networks_LH_Default_PFC_11
175	TNpre vs TNpost (paired)	-1.02982	0.3096059509111534	0.5296288623667401	FALSE	7Networks_LH_Default_PFC_11
176	HC vs TNpre (indep)	1.8948488824996232	0.06094682808065015	0.20315609360216716	FALSE	7Networks_LH_Default_PFC_12
176	HC vs TNpost (indep)	0.4111244578019462	0.6820043356766661	0.8371321550126058	FALSE	7Networks_LH_Default_PFC_12
176	TNpre vs TNpost (paired)	-1.07346	0.28983251545787847	0.5135715133541111	FALSE	7Networks_LH_Default_PFC_12
177	HC vs TNpre (indep)	0.750992514992074	0.45462764527900124	0.6636899931080309	FALSE	7Networks_LH_Default_PFC_13
177	HC vs TNpost (indep)	0.14545061040032423	0.8846956373439685	0.9493787517038536	FALSE	7Networks_LH_Default_PFC_13
177	TNpre vs TNpost (paired)	-0.343615	0.7330295840055415	0.869424423577896	FALSE	7Networks_LH_Default_PFC_13
178	HC vs TNpre (indep)	-0.487125	0.6275757248141114	0.7969215553195066	FALSE	7Networks_LH_Default_PFC_14
178	HC vs TNpost (indep)	-0.917699	0.36139623363723883	0.5754765091351557	FALSE	7Networks_LH_Default_PFC_14
178	TNpre vs TNpost (paired)	-1.12259	0.2686564181498099	0.49737138112130747	FALSE	7Networks_LH_Default_PFC_14
179	HC vs TNpre (indep)	0.5441353249334061	0.5877695275905432	0.7700037479352095	FALSE	7Networks_LH_Default_PFC_15
179	HC vs TNpost (indep)	0.03272835277670175	0.9739670663735038	0.9946897699133657	FALSE	7Networks_LH_Default_PFC_15
179	TNpre vs TNpost (paired)	-0.880623	0.38405791560676306	0.597642962431898	FALSE	7Networks_LH_Default_PFC_15
180	HC vs TNpre (indep)	1.6560963880218473	0.10175841114583666	0.28799550324293394	FALSE	7Networks_LH_Default_PFC_16
180	HC vs TNpost (indep)	0.08203540770829468	0.9348129850889595	0.9746095413612089	FALSE	7Networks_LH_Default_PFC_16
180	TNpre vs TNpost (paired)	-1.83469	0.07438926398886615	0.23066438446160048	FALSE	7Networks_LH_Default_PFC_16
181	HC vs TNpre (indep)	4.091282259705462	8.851216383068282e-05	0.007586756899772813	TRUE	7Networks_LH_Default_PFC_17
181	HC vs TNpost (indep)	2.3124781624600517	0.023161103412237274	0.1154130847576245	FALSE	7Networks_LH_Default_PFC_17
181	TNpre vs TNpost (paired)	-0.0214323	0.9830129860547983	0.9961593043081346	FALSE	7Networks_LH_Default_PFC_17
182	HC vs TNpre (indep)	0.6155465077601622	0.5398924742947516	0.7387227096451507	FALSE	7Networks_LH_Default_PFC_18
182	HC vs TNpost (indep)	0.2945489029825695	0.7690486430083758	0.895109962764356	FALSE	7Networks_LH_Default_PFC_18
182	TNpre vs TNpost (paired)	-0.0375203	0.9702665476401116	0.993342838204998	FALSE	7Networks_LH_Default_PFC_18
183	HC vs TNpre (indep)	1.8885677042208782	0.06280985623733815	0.2070654601230928	FALSE	7Networks_LH_Default_PFC_19
183	HC vs TNpost (indep)	0.8432029189626925	0.40145545866801713	0.6159172488547789	FALSE	7Networks_LH_Default_PFC_19
183	TNpre vs TNpost (paired)	-0.376562	0.7085936977390688	0.8528710504381971	FALSE	7Networks_LH_Default_PFC_19
184	HC vs TNpre (indep)	1.2256120146773835	0.2241255093478223	0.4483595012753416	FALSE	7Networks_LH_Default_PFC_20
184	HC vs TNpost (indep)	0.8385154444611693	0.40409602203209816	0.6169404916520582	FALSE	7Networks_LH_Default_PFC_20
184	TNpre vs TNpost (paired)	-0.955159	0.3455346731975565	0.5610847196712689	FALSE	7Networks_LH_Default_PFC_20
185	HC vs TNpre (indep)	2.2486713968821963	0.026993220517397516	0.12702692008187066	FALSE	7Networks_LH_Default_PFC_21
185	HC vs TNpost (indep)	0.39683346415393944	0.6924741125861011	0.8436232843688543	FALSE	7Networks_LH_Default_PFC_21
185	TNpre vs TNpost (paired)	-1.48202	0.14658153634365995	0.3490036579610951	FALSE	7Networks_LH_Default_PFC_21
186	HC vs TNpre (indep)	1.5967232819518755	0.11454248452620314	0.3131001854930382	FALSE	7Networks_LH_Default_PFC_22
186	HC vs TNpost (indep)	0.20633694992362603	0.8370191046135182	0.9352168766631489	FALSE	7Networks_LH_Default_PFC_22
186	TNpre vs TNpost (paired)	-0.829279	0.41212556277896095	0.6254497204186495	FALSE	7Networks_LH_Default_PFC_22
187	HC vs TNpre (indep)	1.5417377224628805	0.1273133875187276	0.3314014425650176	FALSE	7Networks_LH_Default_PFC_23
187	HC vs TNpost (indep)	0.5185337914719375	0.6054186935506659	0.7795090474901278	FALSE	7Networks_LH_Default_PFC_23
187	TNpre vs TNpost (paired)	-0.74622	0.4601263702823851	0.669274720410742	FALSE	7Networks_LH_Default_PFC_23
188	HC vs TNpre (indep)	1.0501736992924036	0.2969867943795424	0.5180002227550158	FALSE	7Networks_LH_Default_PFC_24
188	HC vs TNpost (indep)	-0.438476	0.6621988625427618	0.8234597254417764	FALSE	7Networks_LH_Default_PFC_24
188	TNpre vs TNpost (paired)	-1.8414	0.07337861455068051	0.2287125648332899	FALSE	7Networks_LH_Default_PFC_24
189	HC vs TNpre (indep)	2.232059211432181	0.028166264119196857	0.13058804274782015	FALSE	7Networks_LH_Default_pCunPCC_1
189	HC vs TNpost (indep)	0.15394551478329951	0.8780141249622203	0.9493787517038536	FALSE	7Networks_LH_Default_pCunPCC_1
189	TNpre vs TNpost (paired)	-3.34406	0.0018658708608156696	0.029963839642861003	TRUE	7Networks_LH_Default_pCunPCC_1
190	HC vs TNpre (indep)	2.5599112701131874	0.012093581039626499	0.08388611125752485	FALSE	7Networks_LH_Default_pCunPCC_2
190	HC vs TNpost (indep)	0.544883904896973	0.5872436251013973	0.7700037479352095	FALSE	7Networks_LH_Default_pCunPCC_2
190	TNpre vs TNpost (paired)	-2.73272	0.009479997063500752	0.07439313518964087	FALSE	7Networks_LH_Default_pCunPCC_2
191	HC vs TNpre (indep)	2.307467838640675	0.023485397663206332	0.11645651733821322	FALSE	7Networks_LH_Default_pCunPCC_3
191	HC vs TNpost (indep)	0.14901297990185486	0.881902737622984	0.9493787517038536	FALSE	7Networks_LH_Default_pCunPCC_3
191	TNpre vs TNpost (paired)	-2.99056	0.004866229622144039	0.051900119770398156	FALSE	7Networks_LH_Default_pCunPCC_3
192	HC vs TNpre (indep)	2.67358275249085	0.00907312778801846	0.07353479972145527	FALSE	7Networks_LH_Default_pCunPCC_4
192	HC vs TNpost (indep)	0.40294784636043873	0.6879972170750754	0.840729796833086	FALSE	7Networks_LH_Default_pCunPCC_4
192	TNpre vs TNpost (paired)	-2.5639	0.014428763652962086	0.09452590626611923	FALSE	7Networks_LH_Default_pCunPCC_4
193	HC vs TNpre (indep)	0.4152164495015176	0.6788377331058197	0.8361569172318949	FALSE	7Networks_LH_Default_pCunPCC_5
193	HC vs TNpost (indep)	-1.87794	0.06379018856235076	0.20808789813789308	FALSE	7Networks_LH_Default_pCunPCC_5
193	TNpre vs TNpost (paired)	-3.10563	0.0035808499366122553	0.04384714208096639	TRUE	7Networks_LH_Default_pCunPCC_5
194	HC vs TNpre (indep)	0.76339494103806	0.44718032681021913	0.6568132095131738	FALSE	7Networks_LH_Default_pCunPCC_6
194	HC vs TNpost (indep)	-0.387582	0.6992889988030466	0.8476128659861846	FALSE	7Networks_LH_Default_pCunPCC_6
194	TNpre vs TNpost (paired)	-2.49152	0.017201651773782703	0.10151185542373668	FALSE	7Networks_LH_Default_pCunPCC_6
195	HC vs TNpre (indep)	0.8491392831145426	0.39782963084370326	0.6120455859133896	FALSE	7Networks_LH_Default_pCunPCC_7
195	HC vs TNpost (indep)	-0.801697	0.4249378726644558	0.636611045190196	FALSE	7Networks_LH_Default_pCunPCC_7
195	TNpre vs TNpost (paired)	-2.66	0.011379413596814967	0.08196487002065735	FALSE	7Networks_LH_Default_pCunPCC_7
196	HC vs TNpre (indep)	1.1771758502303529	0.24214121985679804	0.4724706728913133	FALSE	7Networks_LH_Default_pCunPCC_8
196	HC vs TNpost (indep)	-1.14817	0.25423282123785584	0.48195795495328125	FALSE	7Networks_LH_Default_pCunPCC_8
196	TNpre vs TNpost (paired)	-2.39317	0.02174885277990727	0.11201125895231212	FALSE	7Networks_LH_Default_pCunPCC_8
197	HC vs TNpre (indep)	0.6813154749422106	0.4977478152156293	0.703943772439481	FALSE	7Networks_LH_Default_pCunPCC_9
197	HC vs TNpost (indep)	-0.822696	0.41310229012689514	0.6259125607983259	FALSE	7Networks_LH_Default_pCunPCC_9
197	TNpre vs TNpost (paired)	-1.83051	0.07502502252867754	0.23191526138912458	FALSE	7Networks_LH_Default_pCunPCC_9
198	HC vs TNpre (indep)	1.2784340887811585	0.20478833349525366	0.42297074043770116	FALSE	7Networks_LH_Default_pCunPCC_10
198	HC vs TNpost (indep)	-1.13186	0.2608403196102992	0.4906087516181176	FALSE	7Networks_LH_Default_pCunPCC_10
198	TNpre vs TNpost (paired)	-2.91554	0.005926125195223727	0.058289756018594034	FALSE	7Networks_LH_Default_pCunPCC_10
199	HC vs TNpre (indep)	1.6371565480745065	0.10550375477227125	0.29442908308540816	FALSE	7Networks_LH_Default_pCunPCC_11
199	HC vs TNpost (indep)	0.3609840817193724	0.7189970737884147	0.8606822957987074	FALSE	7Networks_LH_Default_pCunPCC_11
199	TNpre vs TNpost (paired)	-1.58446	0.12137670976579354	0.3261423768111441	FALSE	7Networks_LH_Default_pCunPCC_11
200	HC vs TNpre (indep)	1.5134572796583312	0.13334207837040593	0.3363195921614482	FALSE	7Networks_RH_Vis_1
200	HC vs TNpost (indep)	0.624603056803552	0.5338902123078735	0.7342150018664726	FALSE	7Networks_RH_Vis_1
200	TNpre vs TNpost (paired)	-2.14615	0.038309630064211314	0.15719992006196323	FALSE	7Networks_RH_Vis_1
201	HC vs TNpre (indep)	1.0291672994664014	0.3063660984675678	0.5268423808407973	FALSE	7Networks_RH_Vis_2
201	HC vs TNpost (indep)	-0.973748	0.3331467061347142	0.5494937256420973	FALSE	7Networks_RH_Vis_2
201	TNpre vs TNpost (paired)	-4.09996	0.00020967493210817312	0.009443880853953129	TRUE	7Networks_RH_Vis_2
202	HC vs TNpre (indep)	1.3185455521474916	0.19019794184060373	0.40467647200128454	FALSE	7Networks_RH_Vis_3
202	HC vs TNpost (indep)	-1.01249	0.3144160629998626	0.533662341725368	FALSE	7Networks_RH_Vis_3
202	TNpre vs TNpost (paired)	-2.98893	0.0048872612783791595	0.051900119770398156	FALSE	7Networks_RH_Vis_3
203	HC vs TNpre (indep)	0.9341959163921096	0.3525445533704258	0.5695421205399067	FALSE	7Networks_RH_Vis_4
203	HC vs TNpost (indep)	-0.899808	0.37074223456100575	0.5853824756226407	FALSE	7Networks_RH_Vis_4
203	TNpre vs TNpost (paired)	-2.50708	0.016567468697696992	0.10021038795448454	FALSE	7Networks_RH_Vis_4
204	HC vs TNpre (indep)	1.6284787121506479	0.10709608220769076	0.29611819965260117	FALSE	7Networks_RH_Vis_5
204	HC vs TNpost (indep)	-0.998083	0.32108412313308937	0.5411530165164428	FALSE	7Networks_RH_Vis_5
204	TNpre vs TNpost (paired)	-3.42175	0.0015021834545616	0.026509119786381177	TRUE	7Networks_RH_Vis_5
205	HC vs TNpre (indep)	0.019640300451407	0.9843809652947282	0.9961593043081346	FALSE	7Networks_RH_Vis_6
205	HC vs TNpost (indep)	-2.00558	0.048493769234474335	0.17475232156567327	FALSE	7Networks_RH_Vis_6
205	TNpre vs TNpost (paired)	-3.48105	0.001271349820627048	0.023699033169476396	TRUE	7Networks_RH_Vis_6
206	HC vs TNpre (indep)	1.4625812966352476	0.14746610444100305	0.349721986816608	FALSE	7Networks_RH_Vis_7
206	HC vs TNpost (indep)	-0.45207	0.6523631329280022	0.8154539161600027	FALSE	7Networks_RH_Vis_7
206	TNpre vs TNpost (paired)	-2.64257	0.01188396641434463	0.08291139358845091	FALSE	7Networks_RH_Vis_7
207	HC vs TNpre (indep)	0.8189358421525305	0.4153028794547906	0.6268722708751556	FALSE	7Networks_RH_Vis_8
207	HC vs TNpost (indep)	-1.43273	0.1561048556815598	0.35886173719898806	FALSE	7Networks_RH_Vis_8
207	TNpre vs TNpost (paired)	-2.61197	0.012820123094766487	0.08790941550697019	FALSE	7Networks_RH_Vis_8
208	HC vs TNpre (indep)	0.18439409079004251	0.8541528808426222	0.9455566946597294	FALSE	7Networks_RH_Vis_9
208	HC vs TNpost (indep)	-0.908553	0.36647680583670805	0.5801743628021763	FALSE	7Networks_RH_Vis_9
208	TNpre vs TNpost (paired)	-1.32961	0.19157365651399186	0.40544689209310447	FALSE	7Networks_RH_Vis_9
209	HC vs TNpre (indep)	0.609489790181927	0.5438388713792999	0.7392463471568288	FALSE	7Networks_RH_Vis_10
209	HC vs TNpost (indep)	-0.941408	0.3493857548045486	0.5665714942776463	FALSE	7Networks_RH_Vis_10
209	TNpre vs TNpost (paired)	-1.75803	0.08679491702788993	0.2573440203609364	FALSE	7Networks_RH_Vis_10
210	HC vs TNpre (indep)	1.358976252068525	0.17746780851882332	0.38790777818322036	FALSE	7Networks_RH_Vis_11
210	HC vs TNpost (indep)	-0.786699	0.4336990521917935	0.6428630914424122	FALSE	7Networks_RH_Vis_11
210	TNpre vs TNpost (paired)	-4.54453	5.446164438275979e-05	0.006610639088309547	TRUE	7Networks_RH_Vis_11
211	HC vs TNpre (indep)	1.7284617744069604	0.08721322554799966	0.25777308043743746	FALSE	7Networks_RH_Vis_12
211	HC vs TNpost (indep)	-1.37675	0.17224695609620663	0.3806562565662025	FALSE	7Networks_RH_Vis_12
211	TNpre vs TNpost (paired)	-3.86041	0.00042630127176662377	0.015045927238822017	TRUE	7Networks_RH_Vis_12
212	HC vs TNpre (indep)	0.011509761751884338	0.9908475009641274	0.9961593043081346	FALSE	7Networks_RH_Vis_13
212	HC vs TNpost (indep)	-1.4204	0.1597782089749179	0.3617619825847198	FALSE	7Networks_RH_Vis_13
212	TNpre vs TNpost (paired)	-2.09848	0.042563418644508265	0.16547029507167157	FALSE	7Networks_RH_Vis_13
213	HC vs TNpre (indep)	1.7308979105953728	0.08679936189960705	0.2573440203609364	FALSE	7Networks_RH_Vis_14
213	HC vs TNpost (indep)	-1.09023	0.278657869702949	0.5081906438351653	FALSE	7Networks_RH_Vis_14
213	TNpre vs TNpost (paired)	-3.47763	0.0012836976300133049	0.023699033169476396	TRUE	7Networks_RH_Vis_14
214	HC vs TNpre (indep)	0.1358971509803252	0.8922481141864166	0.9534263018910952	FALSE	7Networks_RH_Vis_15
214	HC vs TNpost (indep)	-2.1317	0.03659835167609893	0.15249183323448254	FALSE	7Networks_RH_Vis_15
214	TNpre vs TNpost (paired)	-3.26808	0.0023019360835224373	0.033203251532169145	TRUE	7Networks_RH_Vis_15
215	HC vs TNpre (indep)	0.17155498434638639	0.8641457400480769	0.9477008403928937	FALSE	7Networks_RH_Vis_16
215	HC vs TNpost (indep)	-1.05905	0.29263156253634726	0.5144816008574142	FALSE	7Networks_RH_Vis_16
215	TNpre vs TNpost (paired)	-1.36107	0.18150803547369845	0.39174396145402546	FALSE	7Networks_RH_Vis_16
216	HC vs TNpre (indep)	1.6299244587306538	0.10672205080640171	0.2959940274259134	FALSE	7Networks_RH_Vis_17
216	HC vs TNpost (indep)	-1.68334	0.09609058920980382	0.2745445405994395	FALSE	7Networks_RH_Vis_17
216	TNpre vs TNpost (paired)	-4.55982	5.1964263083257584e-05	0.006610639088309547	TRUE	7Networks_RH_Vis_17
217	HC vs TNpre (indep)	0.5227493280572022	0.6025670822967308	0.777505912640943	FALSE	7Networks_RH_Vis_18
217	HC vs TNpost (indep)	-0.974655	0.33266077674285344	0.5494937256420973	FALSE	7Networks_RH_Vis_18
217	TNpre vs TNpost (paired)	-2.06148	0.046146779518679064	0.17189894046423607	FALSE	7Networks_RH_Vis_18
218	HC vs TNpre (indep)	1.4942027325941079	0.13834991470069122	0.3423090673006793	FALSE	7Networks_RH_Vis_19
218	HC vs TNpost (indep)	-1.91989	0.05841352710338268	0.19801195628265314	FALSE	7Networks_RH_Vis_19
218	TNpre vs TNpost (paired)	-4.11379	0.00020117865274840615	0.009443880853953129	TRUE	7Networks_RH_Vis_19
219	HC vs TNpre (indep)	1.9828735759900662	0.04989050011763848	0.1787122392273617	FALSE	7Networks_RH_Vis_20
219	HC vs TNpost (indep)	-1.54041	0.12714772566127303	0.3314014425650176	FALSE	7Networks_RH_Vis_20
219	TNpre vs TNpost (paired)	-3.82262	0.00047617914729239266	0.015872638243079756	TRUE	7Networks_RH_Vis_20
220	HC vs TNpre (indep)	1.059540399273639	0.29270489992332605	0.5144816008574142	FALSE	7Networks_RH_Vis_21
220	HC vs TNpost (indep)	-0.915695	0.3627047635272441	0.5754765091351557	FALSE	7Networks_RH_Vis_21
220	TNpre vs TNpost (paired)	-3.59188	0.0009279422136687147	0.020620938081526995	TRUE	7Networks_RH_Vis_21
221	HC vs TNpre (indep)	0.8416869598379598	0.4025162182992261	0.6159172488547789	FALSE	7Networks_RH_Vis_22
221	HC vs TNpost (indep)	-1.51183	0.13452783686457928	0.3363195921614482	FALSE	7Networks_RH_Vis_22
221	TNpre vs TNpost (paired)	-3.83442	0.0004600269673397962	0.01577235316593587	TRUE	7Networks_RH_Vis_22
222	HC vs TNpre (indep)	0.12552991771434194	0.9004375735641388	0.9567770385411475	FALSE	7Networks_RH_Vis_23
222	HC vs TNpost (indep)	-2.07023	0.04166058472052296	0.16436787646881978	FALSE	7Networks_RH_Vis_23
222	TNpre vs TNpost (paired)	-4.50973	6.059752497617085e-05	0.006610639088309547	TRUE	7Networks_RH_Vis_23
223	HC vs TNpre (indep)	1.847001690946946	0.0674509044352303	0.21605136492889393	FALSE	7Networks_RH_Vis_24
223	HC vs TNpost (indep)	-1.52851	0.130073003083727	0.333943702738432	FALSE	7Networks_RH_Vis_24
223	TNpre vs TNpost (paired)	-5.0041	1.3107652941971336e-05	0.004852603848612792	TRUE	7Networks_RH_Vis_24
224	HC vs TNpre (indep)	1.0943804392180865	0.27693076640412545	0.5081298466130741	FALSE	7Networks_RH_Vis_25
224	HC vs TNpost (indep)	-2.48372	0.015374493011323464	0.0971020611241482	FALSE	7Networks_RH_Vis_25
224	TNpre vs TNpost (paired)	-4.15441	0.00017812213494613308	0.009293328779798249	TRUE	7Networks_RH_Vis_25
225	HC vs TNpre (indep)	-0.465155	0.6432390043796732	0.8083650314914864	FALSE	7Networks_RH_Vis_26
225	HC vs TNpost (indep)	-2.2172	0.02967935188182584	0.1343970651252491	FALSE	7Networks_RH_Vis_26
225	TNpre vs TNpost (paired)	-4.08665	0.00021818180959770354	0.009443880853953129	TRUE	7Networks_RH_Vis_26
226	HC vs TNpre (indep)	-0.0916787	0.9271781425304031	0.9723352553724053	FALSE	7Networks_RH_Vis_27
226	HC vs TNpost (indep)	-1.94882	0.054699754584015325	0.19237371276680626	FALSE	7Networks_RH_Vis_27
226	TNpre vs TNpost (paired)	-4.51039	6.0474407241618314e-05	0.006610639088309547	TRUE	7Networks_RH_Vis_27
227	HC vs TNpre (indep)	0.6104071355430111	0.5432775948259447	0.7392463471568288	FALSE	7Networks_RH_Vis_28
227	HC vs TNpost (indep)	-2.34754	0.02159134079623881	0.11167934894606282	FALSE	7Networks_RH_Vis_28
227	TNpre vs TNpost (paired)	-4.08333	0.00022035721992557302	0.009443880853953129	TRUE	7Networks_RH_Vis_28
228	HC vs TNpre (indep)	1.4162874503190848	0.16083700642226909	0.3621095829394426	FALSE	7Networks_RH_Vis_29
228	HC vs TNpost (indep)	-1.4974	0.13823636934787023	0.3423090673006793	FALSE	7Networks_RH_Vis_29
228	TNpre vs TNpost (paired)	-4.81702	2.3474527448824562e-05	0.005633886587717895	TRUE	7Networks_RH_Vis_29
229	HC vs TNpre (indep)	1.4603911502439155	0.14725648111027642	0.349721986816608	FALSE	7Networks_RH_Vis_30
229	HC vs TNpost (indep)	-1.48718	0.14067685574832348	0.34551156813923145	FALSE	7Networks_RH_Vis_30
229	TNpre vs TNpost (paired)	-4.38851	8.77589168662102e-05	0.007586756899772813	TRUE	7Networks_RH_Vis_30
230	HC vs TNpre (indep)	1.8099965771973363	0.0740898231547913	0.23033105643976573	FALSE	7Networks_RH_SomMot_1
230	HC vs TNpost (indep)	0.13223851558328786	0.8951050288980323	0.9547786974912345	FALSE	7Networks_RH_SomMot_1
230	TNpre vs TNpost (paired)	-1.53486	0.13310238264848293	0.3363195921614482	FALSE	7Networks_RH_SomMot_1
231	HC vs TNpre (indep)	1.4929541090851346	0.13899284381009205	0.3431922069384989	FALSE	7Networks_RH_SomMot_2
231	HC vs TNpost (indep)	0.47407908117087344	0.6366518876694176	0.8033462304976878	FALSE	7Networks_RH_SomMot_2
231	TNpre vs TNpost (paired)	-0.0506923	0.9598362344300578	0.9878245980412259	FALSE	7Networks_RH_SomMot_2
232	HC vs TNpre (indep)	1.351945198865543	0.17984510407736112	0.3895561821170277	FALSE	7Networks_RH_SomMot_3
232	HC vs TNpost (indep)	0.13984559972493643	0.8891144360221659	0.9517728128694014	FALSE	7Networks_RH_SomMot_3
232	TNpre vs TNpost (paired)	-1.55355	0.1285817291836102	0.3328062501009102	FALSE	7Networks_RH_SomMot_3
233	HC vs TNpre (indep)	2.4853769484634114	0.01499988644996342	0.09599214360816491	FALSE	7Networks_RH_SomMot_4
233	HC vs TNpost (indep)	0.7279806444485696	0.4688268062305374	0.6753807532732832	FALSE	7Networks_RH_SomMot_4
233	TNpre vs TNpost (paired)	-1.74029	0.0899027380236123	0.26248974605434244	FALSE	7Networks_RH_SomMot_4
234	HC vs TNpre (indep)	2.9331670245799484	0.004224234490558426	0.04739774838022653	TRUE	7Networks_RH_SomMot_5
234	HC vs TNpost (indep)	0.9715416828400111	0.33404660950168474	0.5498709621426909	FALSE	7Networks_RH_SomMot_5
234	TNpre vs TNpost (paired)	-2.03052	0.049344522777402096	0.17728571057749257	FALSE	7Networks_RH_SomMot_5
235	HC vs TNpre (indep)	1.1127583721154726	0.2689950219564405	0.49737138112130747	FALSE	7Networks_RH_SomMot_6
235	HC vs TNpost (indep)	-0.182957	0.8552905249069752	0.945641365242426	FALSE	7Networks_RH_SomMot_6
235	TNpre vs TNpost (paired)	-1.13284	0.2643771020581501	0.4926281404810251	FALSE	7Networks_RH_SomMot_6
236	HC vs TNpre (indep)	-0.00220972	0.9982420270760801	0.9990745892337749	FALSE	7Networks_RH_SomMot_7
236	HC vs TNpost (indep)	0.4128729463582411	0.6807273070964677	0.8369598038071323	FALSE	7Networks_RH_SomMot_7
236	TNpre vs TNpost (paired)	0.5548015512984552	0.582281547330116	0.7670009405007016	FALSE	7Networks_RH_SomMot_7
237	HC vs TNpre (indep)	1.0592152848252694	0.29282577782134495	0.5144816008574142	FALSE	7Networks_RH_SomMot_8
237	HC vs TNpost (indep)	0.9191758048283526	0.3607174447918772	0.5754765091351557	FALSE	7Networks_RH_SomMot_8
237	TNpre vs TNpost (paired)	0.2396437305707414	0.811894429655294	0.9185365207371362	FALSE	7Networks_RH_SomMot_8
238	HC vs TNpre (indep)	2.916880815341097	0.004402192263259951	0.048314782835099705	TRUE	7Networks_RH_SomMot_9
238	HC vs TNpost (indep)	0.8734941559715912	0.3851203134243665	0.5978118069129793	FALSE	7Networks_RH_SomMot_9
238	TNpre vs TNpost (paired)	-1.40944	0.16683565962600236	0.37247901066582617	FALSE	7Networks_RH_SomMot_9
239	HC vs TNpre (indep)	0.7776999882679115	0.4389991198142035	0.6479691805375697	FALSE	7Networks_RH_SomMot_10
239	HC vs TNpost (indep)	0.11075541738488683	0.9120903905781206	0.9634757646951978	FALSE	7Networks_RH_SomMot_10
239	TNpre vs TNpost (paired)	-0.571421	0.5710788256188392	0.7580692375471316	FALSE	7Networks_RH_SomMot_10
240	HC vs TNpre (indep)	2.4098874270898967	0.01828744207278439	0.10207400491212876	FALSE	7Networks_RH_SomMot_11
240	HC vs TNpost (indep)	0.7800592495846805	0.4376165886267325	0.647521462826238	FALSE	7Networks_RH_SomMot_11
240	TNpre vs TNpost (paired)	-1.0968	0.279629584818256	0.5087845164271785	FALSE	7Networks_RH_SomMot_11
241	HC vs TNpre (indep)	1.2107583863687341	0.2296416315433205	0.455487533639644	FALSE	7Networks_RH_SomMot_12
241	HC vs TNpost (indep)	-0.589795	0.5569369150740295	0.7509261776279049	FALSE	7Networks_RH_SomMot_12
241	TNpre vs TNpost (paired)	-1.37222	0.1780420365616143	0.38845535249806756	FALSE	7Networks_RH_SomMot_12
242	HC vs TNpre (indep)	2.406951733566471	0.01808979331688975	0.10207400491212876	FALSE	7Networks_RH_SomMot_13
242	HC vs TNpost (indep)	1.1484303068339385	0.25401601661310136	0.48195795495328125	FALSE	7Networks_RH_SomMot_13
242	TNpre vs TNpost (paired)	-1.9533	0.05817599180320017	0.19776541122900906	FALSE	7Networks_RH_SomMot_13
243	HC vs TNpre (indep)	1.8013318721603946	0.07537245995146549	0.23191526138912458	FALSE	7Networks_RH_SomMot_14
243	HC vs TNpost (indep)	0.22791379649604124	0.8202558067766829	0.9251005339586649	FALSE	7Networks_RH_SomMot_14
243	TNpre vs TNpost (paired)	-0.888962	0.37961664943453755	0.5941360586680453	FALSE	7Networks_RH_SomMot_14
244	HC vs TNpre (indep)	3.4820941043859115	0.0007393919267718671	0.019273948774355086	TRUE	7Networks_RH_SomMot_15
244	HC vs TNpost (indep)	0.8721838126763304	0.3855886154588717	0.5978118069129793	FALSE	7Networks_RH_SomMot_15
244	TNpre vs TNpost (paired)	-2.87644	0.006560724035648501	0.062171688294773556	FALSE	7Networks_RH_SomMot_15
245	HC vs TNpre (indep)	3.1767002717833415	0.0020065197583893995	0.03071508535055773	TRUE	7Networks_RH_SomMot_16
245	HC vs TNpost (indep)	0.7040104626556843	0.4833747232775506	0.6921833746217908	FALSE	7Networks_RH_SomMot_16
245	TNpre vs TNpost (paired)	-2.21498	0.032830583279529285	0.14365043565855876	FALSE	7Networks_RH_SomMot_16
246	HC vs TNpre (indep)	2.301793747151154	0.023758186864135798	0.11732437957597924	FALSE	7Networks_RH_SomMot_17
246	HC vs TNpost (indep)	0.4094842474331083	0.6832860867190858	0.8375314648242114	FALSE	7Networks_RH_SomMot_17
246	TNpre vs TNpost (paired)	-2.49019	0.017257015422035237	0.10151185542373668	FALSE	7Networks_RH_SomMot_17
247	HC vs TNpre (indep)	3.539445679119945	0.0006151489462633183	0.017896625466318178	TRUE	7Networks_RH_SomMot_18
247	HC vs TNpost (indep)	1.979271568314692	0.05106032083963788	0.18181716619455626	FALSE	7Networks_RH_SomMot_18
247	TNpre vs TNpost (paired)	-1.5624	0.12648558117471498	0.33068125797311104	FALSE	7Networks_RH_SomMot_18
248	HC vs TNpre (indep)	4.2921854614912345	4.209252657764731e-05	0.006610639088309547	TRUE	7Networks_RH_SomMot_19
248	HC vs TNpost (indep)	1.4576875592114626	0.1485772472881188	0.3509698754837452	FALSE	7Networks_RH_SomMot_19
248	TNpre vs TNpost (paired)	-2.92976	0.005709882683822576	0.05757864891249657	FALSE	7Networks_RH_SomMot_19
249	HC vs TNpre (indep)	2.4067845092452558	0.01833853205179134	0.10207400491212876	FALSE	7Networks_RH_SomMot_20
249	HC vs TNpost (indep)	1.0793781143711276	0.28348540727388644	0.5101462007263533	FALSE	7Networks_RH_SomMot_20
249	TNpre vs TNpost (paired)	-0.465601	0.6441590108465813	0.8085677960417339	FALSE	7Networks_RH_SomMot_20
250	HC vs TNpre (indep)	3.401768142546061	0.0009548856332888701	0.020796994935215567	TRUE	7Networks_RH_SomMot_21
250	HC vs TNpost (indep)	1.236284800931549	0.21971949566504567	0.44343388112133436	FALSE	7Networks_RH_SomMot_21
250	TNpre vs TNpost (paired)	-2.68414	0.010712957626165634	0.07939670362207225	FALSE	7Networks_RH_SomMot_21
251	HC vs TNpre (indep)	3.3992773098745537	0.0009990718962014766	0.02103309255161003	TRUE	7Networks_RH_SomMot_22
251	HC vs TNpost (indep)	0.8758574121262314	0.3835486355763379	0.597642962431898	FALSE	7Networks_RH_SomMot_22
251	TNpre vs TNpost (paired)	-1.84608	0.07268082771108587	0.22772060901645705	FALSE	7Networks_RH_SomMot_22
252	HC vs TNpre (indep)	3.295551177961886	0.0013887412494336458	0.02524984089879356	TRUE	7Networks_RH_SomMot_23
252	HC vs TNpost (indep)	0.8362013480372648	0.4054812216981204	0.6182686989043766	FALSE	7Networks_RH_SomMot_23
252	TNpre vs TNpost (paired)	-2.0446	0.047866543421197005	0.17353429639104656	FALSE	7Networks_RH_SomMot_23
253	HC vs TNpre (indep)	3.1569208787502667	0.002241710483532269	0.03280551927120394	TRUE	7Networks_RH_SomMot_24
253	HC vs TNpost (indep)	0.6322624411809493	0.529077008226172	0.7306011621074873	FALSE	7Networks_RH_SomMot_24
253	TNpre vs TNpost (paired)	-2.75255	0.00901559396631205	0.07353479972145527	FALSE	7Networks_RH_SomMot_24
254	HC vs TNpre (indep)	2.6652640478851612	0.009008899301957238	0.07353479972145527	FALSE	7Networks_RH_SomMot_25
254	HC vs TNpost (indep)	1.1200312389311606	0.26584794597922384	0.49383519376945606	FALSE	7Networks_RH_SomMot_25
254	TNpre vs TNpost (paired)	-2.46546	0.018313851628748934	0.10207400491212876	FALSE	7Networks_RH_SomMot_25
255	HC vs TNpre (indep)	2.4503409498509514	0.01623787718021684	0.09992539803210362	FALSE	7Networks_RH_SomMot_26
255	HC vs TNpost (indep)	0.08991519021638072	0.928580168880647	0.9723352553724053	FALSE	7Networks_RH_SomMot_26
255	TNpre vs TNpost (paired)	-3.21097	0.0026918310100246825	0.036706786500336576	TRUE	7Networks_RH_SomMot_26
256	HC vs TNpre (indep)	1.7784863601427816	0.0787990272493485	0.2399970373076604	FALSE	7Networks_RH_SomMot_27
256	HC vs TNpost (indep)	-0.391028	0.6967555771227028	0.8471192427023742	FALSE	7Networks_RH_SomMot_27
256	TNpre vs TNpost (paired)	-2.72355	0.009702190992260381	0.0746584048770347	FALSE	7Networks_RH_SomMot_27
257	HC vs TNpre (indep)	2.074430908351202	0.040470242597826965	0.16080891098474293	FALSE	7Networks_RH_SomMot_28
257	HC vs TNpost (indep)	0.6699826212986547	0.5046657831449252	0.7092797161309876	FALSE	7Networks_RH_SomMot_28
257	TNpre vs TNpost (paired)	-2.97999	0.005003969026301507	0.05221532897010268	FALSE	7Networks_RH_SomMot_28
258	HC vs TNpre (indep)	1.838335332447708	0.06941134565183496	0.2203534782597935	FALSE	7Networks_RH_SomMot_29
258	HC vs TNpost (indep)	0.40055740130846995	0.6897864981764636	0.8420587973669953	FALSE	7Networks_RH_SomMot_29
258	TNpre vs TNpost (paired)	-2.51068	0.016423943684285288	0.10021038795448454	FALSE	7Networks_RH_SomMot_29
259	HC vs TNpre (indep)	2.6741209294569144	0.008961870701607205	0.07353479972145527	FALSE	7Networks_RH_SomMot_30
259	HC vs TNpost (indep)	0.21815220798824247	0.8278315260158495	0.9286593311761836	FALSE	7Networks_RH_SomMot_30
259	TNpre vs TNpost (paired)	-3.57617	0.0009705264303100598	0.020796994935215567	TRUE	7Networks_RH_SomMot_30
260	HC vs TNpre (indep)	1.279871649230048	0.20425505228801738	0.42297074043770116	FALSE	7Networks_RH_SomMot_31
260	HC vs TNpost (indep)	0.33039030463530217	0.7420075244500905	0.8739816522438512	FALSE	7Networks_RH_SomMot_31
260	TNpre vs TNpost (paired)	-1.15828	0.25397691589868904	0.48195795495328125	FALSE	7Networks_RH_SomMot_31
261	HC vs TNpre (indep)	2.427345820338445	0.017160870827369407	0.10151185542373668	FALSE	7Networks_RH_SomMot_32
261	HC vs TNpost (indep)	0.38315068876410163	0.7025543941502154	0.8490083312993539	FALSE	7Networks_RH_SomMot_32
261	TNpre vs TNpost (paired)	-2.41094	0.02085417037199245	0.10833335258177895	FALSE	7Networks_RH_SomMot_32
262	HC vs TNpre (indep)	1.556319912656816	0.12334299412564174	0.32734992507233446	FALSE	7Networks_RH_SomMot_33
262	HC vs TNpost (indep)	-0.214151	0.8309523875898923	0.9301705831230138	FALSE	7Networks_RH_SomMot_33
262	TNpre vs TNpost (paired)	-2.66967	0.01110794017590903	0.08127761104323682	FALSE	7Networks_RH_SomMot_33
263	HC vs TNpre (indep)	1.4827221728948088	0.1420310050530888	0.34571441392232566	FALSE	7Networks_RH_SomMot_34
263	HC vs TNpost (indep)	0.33686499865242164	0.7370554041679289	0.8722549161750638	FALSE	7Networks_RH_SomMot_34
263	TNpre vs TNpost (paired)	-2.20407	0.033649985573528905	0.14577611078785085	FALSE	7Networks_RH_SomMot_34
264	HC vs TNpre (indep)	1.0745286702769248	0.28578166624573864	0.5103244040102475	FALSE	7Networks_RH_SomMot_35
264	HC vs TNpost (indep)	-0.547495	0.5854938904188478	0.7695429008790989	FALSE	7Networks_RH_SomMot_35
264	TNpre vs TNpost (paired)	-2.42616	0.020114680068849377	0.10723606538569486	FALSE	7Networks_RH_SomMot_35
265	HC vs TNpre (indep)	1.204272589248813	0.23229239753711928	0.4592271450486707	FALSE	7Networks_RH_SomMot_36
265	HC vs TNpost (indep)	-0.26183	0.7940948931332916	0.9090310837898026	FALSE	7Networks_RH_SomMot_36
265	TNpre vs TNpost (paired)	-1.37494	0.17720342228537148	0.38790777818322036	FALSE	7Networks_RH_SomMot_36
266	HC vs TNpre (indep)	2.431857745299615	0.016930416728642657	0.1010771147978666	FALSE	7Networks_RH_SomMot_37
266	HC vs TNpost (indep)	0.45318916982856733	0.6515813763579512	0.8154539161600027	FALSE	7Networks_RH_SomMot_37
266	TNpre vs TNpost (paired)	-1.96836	0.05635376597512405	0.1945728045769608	FALSE	7Networks_RH_SomMot_37
267	HC vs TNpre (indep)	1.47378838682867	0.1444624625690553	0.3485696059754304	FALSE	7Networks_RH_SomMot_38
267	HC vs TNpost (indep)	-0.00241541	0.9980788248647944	0.9990745892337749	FALSE	7Networks_RH_SomMot_38
267	TNpre vs TNpost (paired)	-2.82241	0.007542553380048278	0.06704491893376247	FALSE	7Networks_RH_SomMot_38
268	HC vs TNpre (indep)	1.4217973739789378	0.15894331766910444	0.36055194934390417	FALSE	7Networks_RH_SomMot_39
268	HC vs TNpost (indep)	-0.377762	0.7065535442860175	0.8512693304650814	FALSE	7Networks_RH_SomMot_39
268	TNpre vs TNpost (paired)	-2.46551	0.018311722115879142	0.10207400491212876	FALSE	7Networks_RH_SomMot_39
269	HC vs TNpre (indep)	2.1314867325161115	0.035774097051890795	0.15115815655728504	FALSE	7Networks_RH_SomMot_40
269	HC vs TNpost (indep)	0.1688025210176396	0.8663565182591704	0.9477008403928937	FALSE	7Networks_RH_SomMot_40
269	TNpre vs TNpost (paired)	-3.2025	0.002754713499892837	0.036906874265362474	TRUE	7Networks_RH_SomMot_40
270	HC vs TNpre (indep)	1.512604591407099	0.13400151216977574	0.3363195921614482	FALSE	7Networks_RH_DorsAttn_Post_1
270	HC vs TNpost (indep)	0.9149553623004271	0.3627733745018703	0.5754765091351557	FALSE	7Networks_RH_DorsAttn_Post_1
270	TNpre vs TNpost (paired)	-1.74558	0.08896647519613331	0.2608548971579973	FALSE	7Networks_RH_DorsAttn_Post_1
271	HC vs TNpre (indep)	0.9186238969154615	0.36075652918399315	0.5754765091351557	FALSE	7Networks_RH_DorsAttn_Post_2
271	HC vs TNpost (indep)	-0.00991758	0.9921100639874673	0.9961593043081346	FALSE	7Networks_RH_DorsAttn_Post_2
271	TNpre vs TNpost (paired)	-0.537591	0.5939943165187209	0.7722569662215223	FALSE	7Networks_RH_DorsAttn_Post_2
272	HC vs TNpre (indep)	1.3068862312218998	0.19465031545318232	0.4105103313599627	FALSE	7Networks_RH_DorsAttn_Post_3
272	HC vs TNpost (indep)	0.7376090644806985	0.4627725789990631	0.6706848971000915	FALSE	7Networks_RH_DorsAttn_Post_3
272	TNpre vs TNpost (paired)	-1.45847	0.15292689586942093	0.3549560445711898	FALSE	7Networks_RH_DorsAttn_Post_3
273	HC vs TNpre (indep)	2.1671365832394143	0.03291989150508638	0.14365043565855876	FALSE	7Networks_RH_DorsAttn_Post_4
273	HC vs TNpost (indep)	0.7390872620188691	0.46196892698503056	0.6706848971000915	FALSE	7Networks_RH_DorsAttn_Post_4
273	TNpre vs TNpost (paired)	-2.53103	0.015633003943952232	0.09770627464970144	FALSE	7Networks_RH_DorsAttn_Post_4
274	HC vs TNpre (indep)	1.2236330059793235	0.2241797506376708	0.4483595012753416	FALSE	7Networks_RH_DorsAttn_Post_5
274	HC vs TNpost (indep)	-1.42414	0.1580712448747145	0.36055194934390417	FALSE	7Networks_RH_DorsAttn_Post_5
274	TNpre vs TNpost (paired)	-3.60774	0.0008867861460702256	0.020132607844615954	TRUE	7Networks_RH_DorsAttn_Post_5
275	HC vs TNpre (indep)	2.098518514049669	0.038657474217058084	0.15778560904921668	FALSE	7Networks_RH_DorsAttn_Post_6
275	HC vs TNpost (indep)	0.7865262729364118	0.4339325867236282	0.6428630914424122	FALSE	7Networks_RH_DorsAttn_Post_6
275	TNpre vs TNpost (paired)	-1.26237	0.21450863821287147	0.43777273104667647	FALSE	7Networks_RH_DorsAttn_Post_6
276	HC vs TNpre (indep)	2.108218435587444	0.038382980481796024	0.15719992006196323	FALSE	7Networks_RH_DorsAttn_Post_7
276	HC vs TNpost (indep)	-0.95	0.3449909261525267	0.5609608555325637	FALSE	7Networks_RH_DorsAttn_Post_7
276	TNpre vs TNpost (paired)	-6.2575	2.525290529981817e-07	0.000303034863597818	TRUE	7Networks_RH_DorsAttn_Post_7
277	HC vs TNpre (indep)	1.4103792226430716	0.16206087359643628	0.3635010248892029	FALSE	7Networks_RH_DorsAttn_Post_8
277	HC vs TNpost (indep)	1.1327030595895207	0.26051259799352444	0.4906087516181176	FALSE	7Networks_RH_DorsAttn_Post_8
277	TNpre vs TNpost (paired)	-1.52982	0.13434397230118925	0.3363195921614482	FALSE	7Networks_RH_DorsAttn_Post_8
278	HC vs TNpre (indep)	3.018536246827234	0.0032312710254869827	0.04089132578876327	TRUE	7Networks_RH_DorsAttn_Post_9
278	HC vs TNpost (indep)	1.0905424370438752	0.2785435229869619	0.5081906438351653	FALSE	7Networks_RH_DorsAttn_Post_9
278	TNpre vs TNpost (paired)	-2.4417	0.019384483621837714	0.10573354702820573	FALSE	7Networks_RH_DorsAttn_Post_9
279	HC vs TNpre (indep)	0.7693555555557802	0.4438132615673911	0.6534673789949317	FALSE	7Networks_RH_DorsAttn_Post_10
279	HC vs TNpost (indep)	-0.268388	0.7890571150796138	0.9043634556786404	FALSE	7Networks_RH_DorsAttn_Post_10
279	TNpre vs TNpost (paired)	-1.75769	0.08685360687181604	0.2573440203609364	FALSE	7Networks_RH_DorsAttn_Post_10
280	HC vs TNpre (indep)	1.5940279285645538	0.114292245087395	0.3131001854930382	FALSE	7Networks_RH_DorsAttn_Post_11
280	HC vs TNpost (indep)	0.9397628771800495	0.34997128780404974	0.5667551219498781	FALSE	7Networks_RH_DorsAttn_Post_11
280	TNpre vs TNpost (paired)	-1.69963	0.0973731384423927	0.277548138078079	FALSE	7Networks_RH_DorsAttn_Post_11
281	HC vs TNpre (indep)	1.686973775672968	0.09471199728378255	0.27255251016915844	FALSE	7Networks_RH_DorsAttn_Post_12
281	HC vs TNpost (indep)	-0.949945	0.3448641337502689	0.5609608555325637	FALSE	7Networks_RH_DorsAttn_Post_12
281	TNpre vs TNpost (paired)	-4.46107	7.033097716116215e-05	0.007033097716116215	TRUE	7Networks_RH_DorsAttn_Post_12
282	HC vs TNpre (indep)	3.1685689694370622	0.0020220764522450503	0.03071508535055773	TRUE	7Networks_RH_DorsAttn_Post_13
282	HC vs TNpost (indep)	0.968731802603204	0.3354234915084704	0.5513810819317322	FALSE	7Networks_RH_DorsAttn_Post_13
282	TNpre vs TNpost (paired)	-2.60658	0.012992136498485836	0.08858274885331252	FALSE	7Networks_RH_DorsAttn_Post_13
283	HC vs TNpre (indep)	2.7768261475363083	0.006647908695400203	0.0623241440193769	FALSE	7Networks_RH_DorsAttn_Post_14
283	HC vs TNpost (indep)	0.9172690414221432	0.3615721165730842	0.5754765091351557	FALSE	7Networks_RH_DorsAttn_Post_14
283	TNpre vs TNpost (paired)	-3.16921	0.003015758775894203	0.03933598403340265	TRUE	7Networks_RH_DorsAttn_Post_14
284	HC vs TNpre (indep)	1.8503418699098324	0.06769609434438677	0.21605136492889393	FALSE	7Networks_RH_DorsAttn_Post_15
284	HC vs TNpost (indep)	-0.599302	0.5506727410560354	0.7458321549291675	FALSE	7Networks_RH_DorsAttn_Post_15
284	TNpre vs TNpost (paired)	-3.1427	0.0032402898510008483	0.04089132578876327	TRUE	7Networks_RH_DorsAttn_Post_15
285	HC vs TNpre (indep)	1.63494770164588	0.10578754321939546	0.2945360832094537	FALSE	7Networks_RH_DorsAttn_Post_16
285	HC vs TNpost (indep)	-0.421674	0.6744237168861611	0.8360624589497865	FALSE	7Networks_RH_DorsAttn_Post_16
285	TNpre vs TNpost (paired)	-3.37012	0.0017354273605064442	0.028923789341774073	TRUE	7Networks_RH_DorsAttn_Post_16
286	HC vs TNpre (indep)	2.1154287155789113	0.037289656231404525	0.1537717782738331	FALSE	7Networks_RH_DorsAttn_Post_17
286	HC vs TNpost (indep)	0.5550598167233948	0.580392326538933	0.7661944904804396	FALSE	7Networks_RH_DorsAttn_Post_17
286	TNpre vs TNpost (paired)	-2.65132	0.01162804819543068	0.08291139358845091	FALSE	7Networks_RH_DorsAttn_Post_17
287	HC vs TNpre (indep)	1.4683799368866228	0.14574072445529945	0.34875365414421505	FALSE	7Networks_RH_DorsAttn_Post_18
287	HC vs TNpost (indep)	-0.474134	0.6366223829229231	0.8033462304976878	FALSE	7Networks_RH_DorsAttn_Post_18
287	TNpre vs TNpost (paired)	-3.20073	0.0027680155699021853	0.036906874265362474	TRUE	7Networks_RH_DorsAttn_Post_18
288	HC vs TNpre (indep)	2.872865483756894	0.004974039760208962	0.05221532897010268	FALSE	7Networks_RH_DorsAttn_Post_19
288	HC vs TNpost (indep)	0.7748710385631775	0.44056845014867296	0.6494866586958323	FALSE	7Networks_RH_DorsAttn_Post_19
288	TNpre vs TNpost (paired)	-2.68393	0.010718554988979756	0.07939670362207225	FALSE	7Networks_RH_DorsAttn_Post_19
289	HC vs TNpre (indep)	3.226554771324143	0.0018282365163596861	0.029963839642861003	TRUE	7Networks_RH_DorsAttn_FEF_1
289	HC vs TNpost (indep)	1.7354545342070329	0.08631363355386557	0.2573440203609364	FALSE	7Networks_RH_DorsAttn_FEF_1
289	TNpre vs TNpost (paired)	-1.17387	0.24775126323841287	0.4749225493388107	FALSE	7Networks_RH_DorsAttn_FEF_1
290	HC vs TNpre (indep)	2.939759833519391	0.004265797354220387	0.04739774838022653	TRUE	7Networks_RH_DorsAttn_FEF_2
290	HC vs TNpost (indep)	0.9761759915743278	0.3317982589587368	0.5494937256420973	FALSE	7Networks_RH_DorsAttn_FEF_2
290	TNpre vs TNpost (paired)	-1.51707	0.13752545510442815	0.3423090673006793	FALSE	7Networks_RH_DorsAttn_FEF_2
291	HC vs TNpre (indep)	1.5650800241880614	0.12148803536215118	0.3261423768111441	FALSE	7Networks_RH_DorsAttn_FEF_3
291	HC vs TNpost (indep)	-0.578012	0.5647729228580025	0.7555490606796019	FALSE	7Networks_RH_DorsAttn_FEF_3
291	TNpre vs TNpost (paired)	-1.71632	0.09424679596185395	0.27252085579331264	FALSE	7Networks_RH_DorsAttn_FEF_3
292	HC vs TNpre (indep)	2.080624625821856	0.039950186358431984	0.16004225813043887	FALSE	7Networks_RH_DorsAttn_PrCv_1
292	HC vs TNpost (indep)	0.08754273893993905	0.9304436614551028	0.9725891931586441	FALSE	7Networks_RH_DorsAttn_PrCv_1
292	TNpre vs TNpost (paired)	-1.94145	0.059646467125472995	0.20049232647217816	FALSE	7Networks_RH_DorsAttn_PrCv_1
293	HC vs TNpre (indep)	-0.330122	0.7421560863637369	0.8739816522438512	FALSE	7Networks_RH_SalVentAttn_TempOccPar_1
293	HC vs TNpost (indep)	-0.179777	0.8577542113115214	0.946052438946531	FALSE	7Networks_RH_SalVentAttn_TempOccPar_1
293	TNpre vs TNpost (paired)	-0.0760862	0.9397496621056232	0.9748708478285188	FALSE	7Networks_RH_SalVentAttn_TempOccPar_1
294	HC vs TNpre (indep)	1.1851849015097988	0.23950602616813277	0.47006877037396333	FALSE	7Networks_RH_SalVentAttn_TempOccPar_2
294	HC vs TNpost (indep)	0.789222351453365	0.4324478594769542	0.6428630914424122	FALSE	7Networks_RH_SalVentAttn_TempOccPar_2
294	TNpre vs TNpost (paired)	-0.493877	0.6242361226504791	0.7968971778516755	FALSE	7Networks_RH_SalVentAttn_TempOccPar_2
295	HC vs TNpre (indep)	0.2611040358351723	0.7946668977139616	0.9090310837898026	FALSE	7Networks_RH_SalVentAttn_TempOccPar_3
295	HC vs TNpost (indep)	0.273408068934846	0.7852059758796027	0.9016719340244241	FALSE	7Networks_RH_SalVentAttn_TempOccPar_3
295	TNpre vs TNpost (paired)	0.3676100686309389	0.7152036304619083	0.8573869695847053	FALSE	7Networks_RH_SalVentAttn_TempOccPar_3
296	HC vs TNpre (indep)	0.4879130358127561	0.6268339304480953	0.7969215553195066	FALSE	7Networks_RH_SalVentAttn_TempOccPar_4
296	HC vs TNpost (indep)	-0.490433	0.6251496540161829	0.7969215553195066	FALSE	7Networks_RH_SalVentAttn_TempOccPar_4
296	TNpre vs TNpost (paired)	-1.86195	0.0703575472629239	0.22218172819870705	FALSE	7Networks_RH_SalVentAttn_TempOccPar_4
297	HC vs TNpre (indep)	1.1308514478531575	0.26156515077727116	0.4910619344485371	FALSE	7Networks_RH_SalVentAttn_TempOccPar_5
297	HC vs TNpost (indep)	0.12810994882756957	0.8983638314167846	0.9565542126886791	FALSE	7Networks_RH_SalVentAttn_TempOccPar_5
297	TNpre vs TNpost (paired)	-1.0201	0.314134157513068	0.533662341725368	FALSE	7Networks_RH_SalVentAttn_TempOccPar_5
298	HC vs TNpre (indep)	2.2715737586159896	0.025528765842578505	0.12253807604437682	FALSE	7Networks_RH_SalVentAttn_TempOccPar_6
298	HC vs TNpost (indep)	0.8594823292674455	0.39249657216887546	0.6051054500732702	FALSE	7Networks_RH_SalVentAttn_TempOccPar_6
298	TNpre vs TNpost (paired)	-1.8287	0.07530160994090247	0.23191526138912458	FALSE	7Networks_RH_SalVentAttn_TempOccPar_6
299	HC vs TNpre (indep)	-0.220511	0.8259409704248204	0.9286593311761836	FALSE	7Networks_RH_SalVentAttn_TempOccPar_7
299	HC vs TNpost (indep)	-0.670651	0.5042435773983426	0.7092797161309876	FALSE	7Networks_RH_SalVentAttn_TempOccPar_7
299	TNpre vs TNpost (paired)	-0.920672	0.3630297645127607	0.5754765091351557	FALSE	7Networks_RH_SalVentAttn_TempOccPar_7
300	HC vs TNpre (indep)	3.3861810865391404	0.0010320482174139586	0.021352721739599144	TRUE	7Networks_RH_SalVentAttn_PrC_1
300	HC vs TNpost (indep)	1.5794119417085175	0.11792203686274758	0.3200569185711103	FALSE	7Networks_RH_SalVentAttn_PrC_1
300	TNpre vs TNpost (paired)	-2.37746	0.022568974494129593	0.11453666020839325	FALSE	7Networks_RH_SalVentAttn_PrC_1
301	HC vs TNpre (indep)	1.0838943718545522	0.28095586977039805	0.509285564538486	FALSE	7Networks_RH_SalVentAttn_FrOperIns_1
301	HC vs TNpost (indep)	1.0380312724998102	0.302261292367428	0.5249110721286738	FALSE	7Networks_RH_SalVentAttn_FrOperIns_1
301	TNpre vs TNpost (paired)	-0.991072	0.32791942412785624	0.5476680557288592	FALSE	7Networks_RH_SalVentAttn_FrOperIns_1
302	HC vs TNpre (indep)	1.0181790292005932	0.3114416563317611	0.5308664596564109	FALSE	7Networks_RH_SalVentAttn_FrOperIns_2
302	HC vs TNpost (indep)	0.6994191299421674	0.48618711798910386	0.694220849115549	FALSE	7Networks_RH_SalVentAttn_FrOperIns_2
302	TNpre vs TNpost (paired)	-0.865509	0.3921908114622442	0.6051054500732702	FALSE	7Networks_RH_SalVentAttn_FrOperIns_2
303	HC vs TNpre (indep)	1.1673694893980844	0.2461248117235462	0.47472850852467463	FALSE	7Networks_RH_SalVentAttn_FrOperIns_3
303	HC vs TNpost (indep)	0.574018484629112	0.5674538056156511	0.7575081953680735	FALSE	7Networks_RH_SalVentAttn_FrOperIns_3
303	TNpre vs TNpost (paired)	0.25061747314054256	0.8034600157218059	0.9121589582461372	FALSE	7Networks_RH_SalVentAttn_FrOperIns_3
304	HC vs TNpre (indep)	3.157135641837298	0.0021554563937955895	0.032331845906933845	TRUE	7Networks_RH_SalVentAttn_FrOperIns_4
304	HC vs TNpost (indep)	1.294133277404099	0.1990894333230989	0.4169412216190553	FALSE	7Networks_RH_SalVentAttn_FrOperIns_4
304	TNpre vs TNpost (paired)	-2.1301	0.039697642567680456	0.15985627879602868	FALSE	7Networks_RH_SalVentAttn_FrOperIns_4
305	HC vs TNpre (indep)	1.448338889508285	0.15138087620940582	0.3534183880375233	FALSE	7Networks_RH_SalVentAttn_FrOperIns_5
305	HC vs TNpost (indep)	-0.228356	0.8199187802763991	0.9251005339586649	FALSE	7Networks_RH_SalVentAttn_FrOperIns_5
305	TNpre vs TNpost (paired)	-1.33428	0.19005418018508619	0.40467647200128454	FALSE	7Networks_RH_SalVentAttn_FrOperIns_5
306	HC vs TNpre (indep)	2.971075884834124	0.003890765717184433	0.045773714319816854	TRUE	7Networks_RH_SalVentAttn_FrOperIns_6
306	HC vs TNpost (indep)	0.8040589787176335	0.4236610299938368	0.6354915449907552	FALSE	7Networks_RH_SalVentAttn_FrOperIns_6
306	TNpre vs TNpost (paired)	-1.96926	0.05624634937012974	0.1945728045769608	FALSE	7Networks_RH_SalVentAttn_FrOperIns_6
307	HC vs TNpre (indep)	1.8673990752357668	0.065354480316675	0.21138915466309974	FALSE	7Networks_RH_SalVentAttn_FrOperIns_7
307	HC vs TNpost (indep)	-0.883073	0.37975196416532564	0.5941360586680453	FALSE	7Networks_RH_SalVentAttn_FrOperIns_7
307	TNpre vs TNpost (paired)	-2.92201	0.005826702783547325	0.0580435917273466	FALSE	7Networks_RH_SalVentAttn_FrOperIns_7
308	HC vs TNpre (indep)	0.6237647383040734	0.5341414138578588	0.7342150018664726	FALSE	7Networks_RH_SalVentAttn_FrOperIns_8
308	HC vs TNpost (indep)	-0.798423	0.42682804656925644	0.6369559301994085	FALSE	7Networks_RH_SalVentAttn_FrOperIns_8
308	TNpre vs TNpost (paired)	-1.41829	0.1642554881560847	0.3677361675136225	FALSE	7Networks_RH_SalVentAttn_FrOperIns_8
309	HC vs TNpre (indep)	2.2353561853699695	0.028237702277977828	0.13058804274782015	FALSE	7Networks_RH_SalVentAttn_PFCl_1
309	HC vs TNpost (indep)	0.5669298522894671	0.5722424967800823	0.7587745813658551	FALSE	7Networks_RH_SalVentAttn_PFCl_1
309	TNpre vs TNpost (paired)	-2.16511	0.036725116503971214	0.15249183323448254	FALSE	7Networks_RH_SalVentAttn_PFCl_1
310	HC vs TNpre (indep)	2.442026846051502	0.016913218943504314	0.1010771147978666	FALSE	7Networks_RH_SalVentAttn_Med_1
310	HC vs TNpost (indep)	0.09773501659897839	0.922370291340127	0.9709160961475022	FALSE	7Networks_RH_SalVentAttn_Med_1
310	TNpre vs TNpost (paired)	-2.46463	0.018350298335778992	0.10207400491212876	FALSE	7Networks_RH_SalVentAttn_Med_1
311	HC vs TNpre (indep)	1.74063294637908	0.08583017511753951	0.2573440203609364	FALSE	7Networks_RH_SalVentAttn_Med_2
311	HC vs TNpost (indep)	-0.167625	0.8672833310644763	0.9478506350431435	FALSE	7Networks_RH_SalVentAttn_Med_2
311	TNpre vs TNpost (paired)	-1.08855	0.2832068599783653	0.5101462007263533	FALSE	7Networks_RH_SalVentAttn_Med_2
312	HC vs TNpre (indep)	2.2346222923252603	0.02829407592869437	0.13058804274782015	FALSE	7Networks_RH_SalVentAttn_Med_3
312	HC vs TNpost (indep)	0.14610043211037946	0.884217896760798	0.9493787517038536	FALSE	7Networks_RH_SalVentAttn_Med_3
312	TNpre vs TNpost (paired)	-1.46436	0.1513202694195903	0.3534183880375233	FALSE	7Networks_RH_SalVentAttn_Med_3
313	HC vs TNpre (indep)	2.4203204099919393	0.018031905151120672	0.10207400491212876	FALSE	7Networks_RH_SalVentAttn_Med_4
313	HC vs TNpost (indep)	0.23453701330266208	0.8151759588295636	0.92110277833849	FALSE	7Networks_RH_SalVentAttn_Med_4
313	TNpre vs TNpost (paired)	-2.22867	0.031828085125344026	0.14041802261181188	FALSE	7Networks_RH_SalVentAttn_Med_4
314	HC vs TNpre (indep)	1.9351031224370656	0.05610473056638242	0.1945728045769608	FALSE	7Networks_RH_SalVentAttn_Med_5
314	HC vs TNpost (indep)	0.8972333332602597	0.37221281000021944	0.5861619055121566	FALSE	7Networks_RH_SalVentAttn_Med_5
314	TNpre vs TNpost (paired)	-1.61129	0.11539233174269614	0.31448720113629913	FALSE	7Networks_RH_SalVentAttn_Med_5
315	HC vs TNpre (indep)	2.422259503035188	0.01767973762519796	0.10207400491212876	FALSE	7Networks_RH_SalVentAttn_Med_6
315	HC vs TNpost (indep)	0.3413055808473398	0.7337206273923624	0.869424423577896	FALSE	7Networks_RH_SalVentAttn_Med_6
315	TNpre vs TNpost (paired)	-2.83264	0.007346759160002916	0.06599724295753563	FALSE	7Networks_RH_SalVentAttn_Med_6
316	HC vs TNpre (indep)	1.0687990143417547	0.2882330348394655	0.5128567117906473	FALSE	7Networks_RH_SalVentAttn_Med_7
316	HC vs TNpost (indep)	-0.08359	0.9335797717134658	0.974170196570573	FALSE	7Networks_RH_SalVentAttn_Med_7
316	TNpre vs TNpost (paired)	-1.35093	0.18470869523956418	0.39580434694192324	FALSE	7Networks_RH_SalVentAttn_Med_7
317	HC vs TNpre (indep)	1.2372430536067347	0.2199078773327414	0.44343388112133436	FALSE	7Networks_RH_SalVentAttn_Med_8
317	HC vs TNpost (indep)	0.08463303609655291	0.9327582517837792	0.9741600540822759	FALSE	7Networks_RH_SalVentAttn_Med_8
317	TNpre vs TNpost (paired)	-1.96197	0.05712122767658559	0.1952862484669593	FALSE	7Networks_RH_SalVentAttn_Med_8
318	HC vs TNpre (indep)	0.1870649517925608	0.8520849678500058	0.944647890414008	FALSE	7Networks_RH_Limbic_OFC_1
318	HC vs TNpost (indep)	-0.813746	0.41805959507502854	0.6294498294730668	FALSE	7Networks_RH_Limbic_OFC_1
318	TNpre vs TNpost (paired)	-2.09831	0.04257963577161524	0.16547029507167157	FALSE	7Networks_RH_Limbic_OFC_1
319	HC vs TNpre (indep)	2.478109762003109	0.015038769165279171	0.09599214360816491	FALSE	7Networks_RH_Limbic_OFC_2
319	HC vs TNpost (indep)	0.5236578038333021	0.601869522711989	0.7774417946764121	FALSE	7Networks_RH_Limbic_OFC_2
319	TNpre vs TNpost (paired)	-3.34157	0.001878814207427526	0.029963839642861003	TRUE	7Networks_RH_Limbic_OFC_2
320	HC vs TNpre (indep)	1.7663183772325803	0.08078389663692517	0.2454194328210385	FALSE	7Networks_RH_Limbic_OFC_3
320	HC vs TNpost (indep)	0.8192479591422018	0.4149174943008226	0.6268722708751556	FALSE	7Networks_RH_Limbic_OFC_3
320	TNpre vs TNpost (paired)	-1.65186	0.10680451156285042	0.2959940274259134	FALSE	7Networks_RH_Limbic_OFC_3
321	HC vs TNpre (indep)	-0.691784	0.4912509283651837	0.6984610355903086	FALSE	7Networks_RH_Limbic_OFC_4
321	HC vs TNpost (indep)	-1.03207	0.30498918080898113	0.5268423808407973	FALSE	7Networks_RH_Limbic_OFC_4
321	TNpre vs TNpost (paired)	-1.4901	0.14445207019709594	0.3485696059754304	FALSE	7Networks_RH_Limbic_OFC_4
322	HC vs TNpre (indep)	0.33140548321031954	0.7411711203008773	0.8739816522438512	FALSE	7Networks_RH_Limbic_OFC_5
322	HC vs TNpost (indep)	-0.858844	0.3928142880058979	0.6051054500732702	FALSE	7Networks_RH_Limbic_OFC_5
322	TNpre vs TNpost (paired)	-3.64101	0.0008060869643998534	0.01980075440318115	TRUE	7Networks_RH_Limbic_OFC_5
323	HC vs TNpre (indep)	1.5109615050330392	0.1343154481852371	0.3363195921614482	FALSE	7Networks_RH_Limbic_OFC_6
323	HC vs TNpost (indep)	0.3670575481088674	0.7144851523024849	0.8573821827629818	FALSE	7Networks_RH_Limbic_OFC_6
323	TNpre vs TNpost (paired)	-1.74805	0.08853261281262868	0.260390037684202	FALSE	7Networks_RH_Limbic_OFC_6
324	HC vs TNpre (indep)	2.014833070307905	0.04663681187535742	0.17219745923208896	FALSE	7Networks_RH_Limbic_TempPole_1
324	HC vs TNpost (indep)	0.4074175697299486	0.6847155938024335	0.8384272577172656	FALSE	7Networks_RH_Limbic_TempPole_1
324	TNpre vs TNpost (paired)	-2.09439	0.0429473127133747	0.16547029507167157	FALSE	7Networks_RH_Limbic_TempPole_1
325	HC vs TNpre (indep)	-0.153539	0.8783345060373238	0.9493787517038536	FALSE	7Networks_RH_Limbic_TempPole_2
325	HC vs TNpost (indep)	-0.346895	0.7295710844659368	0.8693995048253468	FALSE	7Networks_RH_Limbic_TempPole_2
325	TNpre vs TNpost (paired)	0.1871422716877708	0.8525447210986422	0.944647890414008	FALSE	7Networks_RH_Limbic_TempPole_2
326	HC vs TNpre (indep)	1.834649228797688	0.06992373012822536	0.2213943961843547	FALSE	7Networks_RH_Limbic_TempPole_3
326	HC vs TNpost (indep)	1.1247004858740797	0.263859997403961	0.49242923310225994	FALSE	7Networks_RH_Limbic_TempPole_3
326	TNpre vs TNpost (paired)	-0.994703	0.3261729214961653	0.5474230850285291	FALSE	7Networks_RH_Limbic_TempPole_3
327	HC vs TNpre (indep)	-0.505175	0.6146959228000812	0.78807169589754	FALSE	7Networks_RH_Limbic_TempPole_4
327	HC vs TNpost (indep)	-0.666003	0.5073272041619377	0.7112063609746789	FALSE	7Networks_RH_Limbic_TempPole_4
327	TNpre vs TNpost (paired)	-1.95332	0.05817409683414125	0.19776541122900906	FALSE	7Networks_RH_Limbic_TempPole_4
328	HC vs TNpre (indep)	0.27586726402496564	0.7833111756741753	0.9013004704365373	FALSE	7Networks_RH_Limbic_TempPole_5
328	HC vs TNpost (indep)	0.06088794786571869	0.9515898157598176	0.9832085444391776	FALSE	7Networks_RH_Limbic_TempPole_5
328	TNpre vs TNpost (paired)	-1.72408	0.09282067361122959	0.2703514765375619	FALSE	7Networks_RH_Limbic_TempPole_5
329	HC vs TNpre (indep)	-0.419085	0.6762951898203471	0.8361569172318949	FALSE	7Networks_RH_Limbic_TempPole_6
329	HC vs TNpost (indep)	-2.03164	0.04549938142441812	0.17092582722924043	FALSE	7Networks_RH_Limbic_TempPole_6
329	TNpre vs TNpost (paired)	-3.7232	0.0006359401428669258	0.017896625466318178	TRUE	7Networks_RH_Limbic_TempPole_6
330	HC vs TNpre (indep)	-0.177575	0.8594926334116864	0.9470993205638417	FALSE	7Networks_RH_Limbic_TempPole_7
330	HC vs TNpost (indep)	-2.14788	0.03467743983802709	0.1475635737788387	FALSE	7Networks_RH_Limbic_TempPole_7
330	TNpre vs TNpost (paired)	-4.0654	0.00023246600523714638	0.009619282975330195	TRUE	7Networks_RH_Limbic_TempPole_7
331	HC vs TNpre (indep)	-0.193741	0.8467698210179008	0.9426009139345835	FALSE	7Networks_RH_Cont_Par_1
331	HC vs TNpost (indep)	-0.294684	0.7689457455608522	0.895109962764356	FALSE	7Networks_RH_Cont_Par_1
331	TNpre vs TNpost (paired)	0.04357621706626109	0.9654703899729757	0.9910731120338503	FALSE	7Networks_RH_Cont_Par_1
332	HC vs TNpre (indep)	-0.0913122	0.9274782144487157	0.9723352553724053	FALSE	7Networks_RH_Cont_Par_2
332	HC vs TNpost (indep)	0.14855116696898857	0.8822629519107851	0.9493787517038536	FALSE	7Networks_RH_Cont_Par_2
332	TNpre vs TNpost (paired)	-0.157289	0.8758496815993246	0.9493787517038536	FALSE	7Networks_RH_Cont_Par_2
333	HC vs TNpre (indep)	0.03572070169223759	0.9715852297659859	0.993342838204998	FALSE	7Networks_RH_Cont_Par_3
333	HC vs TNpost (indep)	-1.49648	0.13822270909654838	0.3423090673006793	FALSE	7Networks_RH_Cont_Par_3
333	TNpre vs TNpost (paired)	-3.18473	0.002891281496414061	0.0381267889637019	TRUE	7Networks_RH_Cont_Par_3
334	HC vs TNpre (indep)	1.8748165750961314	0.06381362209562054	0.20808789813789308	FALSE	7Networks_RH_Cont_Par_4
334	HC vs TNpost (indep)	1.58988316408568	0.11557404641758992	0.31448720113629913	FALSE	7Networks_RH_Cont_Par_4
334	TNpre vs TNpost (paired)	-0.32274	0.7486610002029295	0.8790540119799564	FALSE	7Networks_RH_Cont_Par_4
335	HC vs TNpre (indep)	0.966466823388261	0.33640086780941114	0.5522312467459554	FALSE	7Networks_RH_Cont_Par_5
335	HC vs TNpost (indep)	-0.103281	0.9179815066298105	0.9679945588363555	FALSE	7Networks_RH_Cont_Par_5
335	TNpre vs TNpost (paired)	-1.31475	0.1964748600134242	0.4136312842387878	FALSE	7Networks_RH_Cont_Par_5
336	HC vs TNpre (indep)	0.7969034945007382	0.4278220664506027	0.6369559301994085	FALSE	7Networks_RH_Cont_Par_6
336	HC vs TNpost (indep)	1.0319412808881872	0.30501889766700446	0.5268423808407973	FALSE	7Networks_RH_Cont_Par_6
336	TNpre vs TNpost (paired)	-0.256403	0.7990226721724685	0.9097032320749167	FALSE	7Networks_RH_Cont_Par_6
337	HC vs TNpre (indep)	0.5377311067448372	0.5920074976997711	0.7713452738759233	FALSE	7Networks_RH_Cont_Temp_1
337	HC vs TNpost (indep)	-0.731503	0.46646264738502763	0.6745903372233277	FALSE	7Networks_RH_Cont_Temp_1
337	TNpre vs TNpost (paired)	-2.06753	0.045543689636681	0.17092582722924043	FALSE	7Networks_RH_Cont_Temp_1
338	HC vs TNpre (indep)	0.05157970107714876	0.9589800804739057	0.9877906408314908	FALSE	7Networks_RH_Cont_Temp_2
338	HC vs TNpost (indep)	-1.07444	0.2856333872677056	0.5103244040102475	FALSE	7Networks_RH_Cont_Temp_2
338	TNpre vs TNpost (paired)	-2.0903	0.04333446202655289	0.16613851256186413	FALSE	7Networks_RH_Cont_Temp_2
339	HC vs TNpre (indep)	0.9780439054320955	0.33113677269982245	0.5494937256420973	FALSE	7Networks_RH_Cont_PFCv_1
339	HC vs TNpost (indep)	-0.335781	0.7378590067918933	0.8723456237933714	FALSE	7Networks_RH_Cont_PFCv_1
339	TNpre vs TNpost (paired)	-1.07119	0.2908404853545579	0.5140038032775692	FALSE	7Networks_RH_Cont_PFCv_1
340	HC vs TNpre (indep)	-0.0354398	0.9718204100438897	0.993342838204998	FALSE	7Networks_RH_Cont_PFCl_1
340	HC vs TNpost (indep)	-1.24273	0.21739192809512878	0.4406593137063421	FALSE	7Networks_RH_Cont_PFCl_1
340	TNpre vs TNpost (paired)	-2.88022	0.006496691637534998	0.062171688294773556	FALSE	7Networks_RH_Cont_PFCl_1
341	HC vs TNpre (indep)	0.9146781038485298	0.36265669431011005	0.5754765091351557	FALSE	7Networks_RH_Cont_PFCl_2
341	HC vs TNpost (indep)	-0.570214	0.5700249170144752	0.7575081953680735	FALSE	7Networks_RH_Cont_PFCl_2
341	TNpre vs TNpost (paired)	-2.53186	0.015601532024176676	0.09770627464970144	FALSE	7Networks_RH_Cont_PFCl_2
342	HC vs TNpre (indep)	0.9774064784755603	0.3307183618788635	0.5494937256420973	FALSE	7Networks_RH_Cont_PFCl_3
342	HC vs TNpost (indep)	-0.0771185	0.9387089892046409	0.9748708478285188	FALSE	7Networks_RH_Cont_PFCl_3
342	TNpre vs TNpost (paired)	-0.684137	0.49804021900093287	0.703943772439481	FALSE	7Networks_RH_Cont_PFCl_3
343	HC vs TNpre (indep)	2.2910323787263507	0.023990457920963434	0.11750428369451478	FALSE	7Networks_RH_Cont_PFCl_4
343	HC vs TNpost (indep)	2.31655636644407	0.022978404629837763	0.11537274291131931	FALSE	7Networks_RH_Cont_PFCl_4
343	TNpre vs TNpost (paired)	-0.208337	0.8360787038647286	0.9350367610789136	FALSE	7Networks_RH_Cont_PFCl_4
344	HC vs TNpre (indep)	0.28701991175063735	0.7747851498422473	0.9000408323433657	FALSE	7Networks_RH_Cont_PFCl_5
344	HC vs TNpost (indep)	-0.188526	0.8509082467335719	0.9445789972990623	FALSE	7Networks_RH_Cont_PFCl_5
344	TNpre vs TNpost (paired)	-0.754388	0.45526633437536834	0.6638148253346805	FALSE	7Networks_RH_Cont_PFCl_5
345	HC vs TNpre (indep)	1.234395133814874	0.22023882762359606	0.44343388112133436	FALSE	7Networks_RH_Cont_PFCl_6
345	HC vs TNpost (indep)	0.7437692462351275	0.459054263125093	0.6685256259103296	FALSE	7Networks_RH_Cont_PFCl_6
345	TNpre vs TNpost (paired)	-0.711611	0.4810516319166197	0.6896797590202433	FALSE	7Networks_RH_Cont_PFCl_6
346	HC vs TNpre (indep)	0.4806165573444765	0.6319287198639453	0.8007544496692021	FALSE	7Networks_RH_Cont_PFCl_7
346	HC vs TNpost (indep)	1.1275218291896953	0.26269605082485764	0.4914253415205118	FALSE	7Networks_RH_Cont_PFCl_7
346	TNpre vs TNpost (paired)	0.3531785355497786	0.7259063840471726	0.866753891399609	FALSE	7Networks_RH_Cont_PFCl_7
347	HC vs TNpre (indep)	2.2965553634096922	0.02419353503820724	0.11801724408881582	FALSE	7Networks_RH_Cont_PFCl_8
347	HC vs TNpost (indep)	0.3569427603807962	0.7220511377478436	0.8630093279854704	FALSE	7Networks_RH_Cont_PFCl_8
347	TNpre vs TNpost (paired)	-2.64417	0.011837009977617611	0.08291139358845091	FALSE	7Networks_RH_Cont_PFCl_8
348	HC vs TNpre (indep)	0.7302910726075588	0.4669539104662419	0.6745903372233277	FALSE	7Networks_RH_Cont_PFCl_9
348	HC vs TNpost (indep)	-0.25397	0.8001254332264682	0.9100952794993004	FALSE	7Networks_RH_Cont_PFCl_9
348	TNpre vs TNpost (paired)	-1.30844	0.1985842039724865	0.4169412216190553	FALSE	7Networks_RH_Cont_PFCl_9
349	HC vs TNpre (indep)	1.0220964546486975	0.30983288448454294	0.5296288623667401	FALSE	7Networks_RH_Cont_PFCl_10
349	HC vs TNpost (indep)	0.09137033298089677	0.9274109081867337	0.9723352553724053	FALSE	7Networks_RH_Cont_PFCl_10
349	TNpre vs TNpost (paired)	-1.06542	0.29340777693034265	0.5147504858427064	FALSE	7Networks_RH_Cont_PFCl_10
350	HC vs TNpre (indep)	1.1838607336506208	0.23967455049717626	0.47006877037396333	FALSE	7Networks_RH_Cont_PFCl_11
350	HC vs TNpost (indep)	1.15035974079689	0.2532168232034098	0.48195795495328125	FALSE	7Networks_RH_Cont_PFCl_11
350	TNpre vs TNpost (paired)	0.8466909875320777	0.40246825257445307	0.6159172488547789	FALSE	7Networks_RH_Cont_PFCl_11
351	HC vs TNpre (indep)	1.925395586479065	0.0571061105370763	0.1952862484669593	FALSE	7Networks_RH_Cont_PFCl_12
351	HC vs TNpost (indep)	1.3538197258816025	0.17934310171279752	0.3891712876227071	FALSE	7Networks_RH_Cont_PFCl_12
351	TNpre vs TNpost (paired)	-0.145232	0.8852956859638434	0.9493787517038536	FALSE	7Networks_RH_Cont_PFCl_12
352	HC vs TNpre (indep)	2.8383281633987614	0.005852728832507448	0.0580435917273466	FALSE	7Networks_RH_Cont_PFCl_13
352	HC vs TNpost (indep)	1.8580086566180394	0.06674865071853214	0.21474096745908464	FALSE	7Networks_RH_Cont_PFCl_13
352	TNpre vs TNpost (paired)	-0.76447	0.4493084373800227	0.65832738077659	FALSE	7Networks_RH_Cont_PFCl_13
353	HC vs TNpre (indep)	-0.290165	0.7724028715547161	0.8981428739008327	FALSE	7Networks_RH_Cont_PFCl_14
353	HC vs TNpost (indep)	0.42170367246930074	0.6743179243100368	0.8360624589497865	FALSE	7Networks_RH_Cont_PFCl_14
353	TNpre vs TNpost (paired)	0.5671817617125724	0.5739262668808256	0.7593291292800338	FALSE	7Networks_RH_Cont_PFCl_14
354	HC vs TNpre (indep)	1.4488216523004933	0.1506344550388034	0.3530495039971955	FALSE	7Networks_RH_Cont_PFCl_15
354	HC vs TNpost (indep)	-0.216864	0.8288284530747438	0.9286593311761836	FALSE	7Networks_RH_Cont_PFCl_15
354	TNpre vs TNpost (paired)	-1.36183	0.18127180111509375	0.39174396145402546	FALSE	7Networks_RH_Cont_PFCl_15
355	HC vs TNpre (indep)	2.204835260887065	0.029872210456597922	0.13462454499096768	FALSE	7Networks_RH_Cont_pCun_1
355	HC vs TNpost (indep)	0.12481116557445394	0.9009650446262472	0.9567770385411475	FALSE	7Networks_RH_Cont_pCun_1
355	TNpre vs TNpost (paired)	-2.89796	0.006203846872248928	0.06052533533901394	FALSE	7Networks_RH_Cont_pCun_1
356	HC vs TNpre (indep)	1.4519417340942473	0.15043420687334283	0.3530495039971955	FALSE	7Networks_RH_Cont_pCun_2
356	HC vs TNpost (indep)	0.2521870298806268	0.801498679726295	0.9107939542344261	FALSE	7Networks_RH_Cont_pCun_2
356	TNpre vs TNpost (paired)	-2.1788	0.035616930910396326	0.15102585545044378	FALSE	7Networks_RH_Cont_pCun_2
357	HC vs TNpre (indep)	2.0516675090496053	0.04281042957494945	0.16547029507167157	FALSE	7Networks_RH_Cont_Cing_1
357	HC vs TNpost (indep)	-0.476969	0.6345987285084598	0.8024430708220777	FALSE	7Networks_RH_Cont_Cing_1
357	TNpre vs TNpost (paired)	-2.47477	0.0179093102305503	0.10207400491212876	FALSE	7Networks_RH_Cont_Cing_1
358	HC vs TNpre (indep)	1.0798804582192152	0.28300453053530944	0.5101462007263533	FALSE	7Networks_RH_Cont_Cing_2
358	HC vs TNpost (indep)	0.009988631153771358	0.9920535403163278	0.9961593043081346	FALSE	7Networks_RH_Cont_Cing_2
358	TNpre vs TNpost (paired)	-1.91004	0.06369773782987902	0.20808789813789308	FALSE	7Networks_RH_Cont_Cing_2
359	HC vs TNpre (indep)	1.0194462085105407	0.31101032151165	0.5308664596564109	FALSE	7Networks_RH_Cont_PFCmp_1
359	HC vs TNpost (indep)	-0.153013	0.8787565932988678	0.9493787517038536	FALSE	7Networks_RH_Cont_PFCmp_1
359	TNpre vs TNpost (paired)	-1.32286	0.1937862342517794	0.4094075371516466	FALSE	7Networks_RH_Cont_PFCmp_1
360	HC vs TNpre (indep)	2.1314741803471073	0.03636492300330365	0.15249183323448254	FALSE	7Networks_RH_Cont_PFCmp_2
360	HC vs TNpost (indep)	1.0873496418484343	0.2800057608571705	0.5087845164271785	FALSE	7Networks_RH_Cont_PFCmp_2
360	TNpre vs TNpost (paired)	-2.05065	0.047243572412850154	0.17282969332071788	FALSE	7Networks_RH_Cont_PFCmp_2
361	HC vs TNpre (indep)	0.5989958857988341	0.5506212856259278	0.7458321549291675	FALSE	7Networks_RH_Default_Par_1
361	HC vs TNpost (indep)	0.2591288696286903	0.7961597242192354	0.9090310837898026	FALSE	7Networks_RH_Default_Par_1
361	TNpre vs TNpost (paired)	-0.078724	0.9376652892407056	0.9748708478285188	FALSE	7Networks_RH_Default_Par_1
362	HC vs TNpre (indep)	1.2572412964727546	0.21199841622793977	0.43486854610859443	FALSE	7Networks_RH_Default_Par_2
362	HC vs TNpost (indep)	0.38983549174893367	0.6976227914986828	0.8473151313749183	FALSE	7Networks_RH_Default_Par_2
362	TNpre vs TNpost (paired)	-1.8158	0.07729822524817102	0.2360251152615909	FALSE	7Networks_RH_Default_Par_2
363	HC vs TNpre (indep)	0.9239163139208753	0.3580168336915601	0.5754765091351557	FALSE	7Networks_RH_Default_Par_3
363	HC vs TNpost (indep)	0.9878029512855178	0.3260244001267101	0.5474230850285291	FALSE	7Networks_RH_Default_Par_3
363	TNpre vs TNpost (paired)	-0.158077	0.8752335438484938	0.9493787517038536	FALSE	7Networks_RH_Default_Par_3
364	HC vs TNpre (indep)	-0.696517	0.4879010965648638	0.6953459808525375	FALSE	7Networks_RH_Default_Par_4
364	HC vs TNpost (indep)	-1.11887	0.26631303962430464	0.49393454026146144	FALSE	7Networks_RH_Default_Par_4
364	TNpre vs TNpost (paired)	-1.44272	0.15729088333753038	0.36020812978060396	FALSE	7Networks_RH_Default_Par_4
365	HC vs TNpre (indep)	1.2791056194694308	0.20409525391312144	0.42297074043770116	FALSE	7Networks_RH_Default_Par_5
365	HC vs TNpost (indep)	1.5949904146300555	0.11438305472048511	0.3131001854930382	FALSE	7Networks_RH_Default_Par_5
365	TNpre vs TNpost (paired)	0.0678825972254385	0.946235025750029	0.9805544308290457	FALSE	7Networks_RH_Default_Par_5
366	HC vs TNpre (indep)	-0.0095585	0.9923932356213321	0.9961593043081346	FALSE	7Networks_RH_Default_Temp_1
366	HC vs TNpost (indep)	-0.660654	0.5106016808699747	0.7141282249929717	FALSE	7Networks_RH_Default_Temp_1
366	TNpre vs TNpost (paired)	-1.17655	0.24669186914161473	0.47472850852467463	FALSE	7Networks_RH_Default_Temp_1
367	HC vs TNpre (indep)	-1.05346	0.29458072495630616	0.5160538247409743	FALSE	7Networks_RH_Default_Temp_2
367	HC vs TNpost (indep)	-2.03473	0.0449583436253338	0.17072788718481194	FALSE	7Networks_RH_Default_Temp_2
367	TNpre vs TNpost (paired)	-1.19437	0.2397350728907213	0.47006877037396333	FALSE	7Networks_RH_Default_Temp_2
368	HC vs TNpre (indep)	-0.962262	0.3384481693919168	0.5548330645769128	FALSE	7Networks_RH_Default_Temp_3
368	HC vs TNpost (indep)	-0.544361	0.5876820440328003	0.7700037479352095	FALSE	7Networks_RH_Default_Temp_3
368	TNpre vs TNpost (paired)	0.3712355017370694	0.7125239517620834	0.8558846267412413	FALSE	7Networks_RH_Default_Temp_3
369	HC vs TNpre (indep)	2.200574068743564	0.030680785779570802	0.13635904790920356	FALSE	7Networks_RH_Default_Temp_4
369	HC vs TNpost (indep)	1.1559893794531189	0.2509419966919911	0.47874466777486374	FALSE	7Networks_RH_Default_Temp_4
369	TNpre vs TNpost (paired)	-0.135271	0.8931113562698669	0.9534996686155163	FALSE	7Networks_RH_Default_Temp_4
370	HC vs TNpre (indep)	0.011652930809311629	0.9907262994881361	0.9961593043081346	FALSE	7Networks_RH_Default_Temp_5
370	HC vs TNpost (indep)	0.10094716060643752	0.9198288349980185	0.9690909587336454	FALSE	7Networks_RH_Default_Temp_5
370	TNpre vs TNpost (paired)	0.4667782037206135	0.6433238375619745	0.8083650314914864	FALSE	7Networks_RH_Default_Temp_5
371	HC vs TNpre (indep)	0.7309428942085063	0.46726700229324314	0.6745903372233277	FALSE	7Networks_RH_Default_Temp_6
371	HC vs TNpost (indep)	0.17631081966573628	0.860467176056565	0.9473033130897963	FALSE	7Networks_RH_Default_Temp_6
371	TNpre vs TNpost (paired)	0.1829557057697016	0.8558054355443956	0.945641365242426	FALSE	7Networks_RH_Default_Temp_6
372	HC vs TNpre (indep)	1.4816933453064416	0.1413718166303022	0.34551156813923145	FALSE	7Networks_RH_Default_Temp_7
372	HC vs TNpost (indep)	0.2685197667491578	0.7889430174999594	0.9043634556786404	FALSE	7Networks_RH_Default_Temp_7
372	TNpre vs TNpost (paired)	-1.03871	0.3055046815656511	0.5268423808407973	FALSE	7Networks_RH_Default_Temp_7
373	HC vs TNpre (indep)	0.5655270959596979	0.5733164763816821	0.7593291292800338	FALSE	7Networks_RH_Default_Temp_8
373	HC vs TNpost (indep)	0.0008344520924139667	0.9993361881560454	0.9993361881560454	FALSE	7Networks_RH_Default_Temp_8
373	TNpre vs TNpost (paired)	0.48505459730803996	0.6304222991968716	0.7996900201228816	FALSE	7Networks_RH_Default_Temp_8
374	HC vs TNpre (indep)	1.431651378144541	0.15543712330437218	0.3580125680714906	FALSE	7Networks_RH_Default_PFCv_1
374	HC vs TNpost (indep)	0.6409413179105992	0.5232735523031224	0.7273332190493637	FALSE	7Networks_RH_Default_PFCv_1
374	TNpre vs TNpost (paired)	-1.27972	0.20840128550498455	0.42895633380099735	FALSE	7Networks_RH_Default_PFCv_1
375	HC vs TNpre (indep)	0.7998454037806522	0.426149800217822	0.636836563214678	FALSE	7Networks_RH_Default_PFCv_2
375	HC vs TNpost (indep)	0.02275346872011203	0.9819016498199693	0.9961593043081346	FALSE	7Networks_RH_Default_PFCv_2
375	TNpre vs TNpost (paired)	-1.85549	0.07129557545578731	0.22455299356153482	FALSE	7Networks_RH_Default_PFCv_2
376	HC vs TNpre (indep)	1.5121990724937473	0.13359917386105136	0.3363195921614482	FALSE	7Networks_RH_Default_PFCv_3
376	HC vs TNpost (indep)	1.3176207794941166	0.1912940317726024	0.40544689209310447	FALSE	7Networks_RH_Default_PFCv_3
376	TNpre vs TNpost (paired)	-0.0605011	0.9520736071986037	0.9832085444391776	FALSE	7Networks_RH_Default_PFCv_3
377	HC vs TNpre (indep)	0.5706625195509728	0.569872085875399	0.7575081953680735	FALSE	7Networks_RH_Default_PFCv_4
377	HC vs TNpost (indep)	-0.924456	0.35798216385914894	0.5754765091351557	FALSE	7Networks_RH_Default_PFCv_4
377	TNpre vs TNpost (paired)	-2.13281	0.039460545328454014	0.15943654678163238	FALSE	7Networks_RH_Default_PFCv_4
378	HC vs TNpre (indep)	0.45119135412820216	0.6532298842446671	0.8156876806385022	FALSE	7Networks_RH_Default_PFCdPFCm_1
378	HC vs TNpost (indep)	0.477410105899468	0.6343034689216487	0.8024430708220777	FALSE	7Networks_RH_Default_PFCdPFCm_1
378	TNpre vs TNpost (paired)	-0.766487	0.4481223433465765	0.6573921907284741	FALSE	7Networks_RH_Default_PFCdPFCm_1
379	HC vs TNpre (indep)	0.5881642360838815	0.5581181749382818	0.7516743096811875	FALSE	7Networks_RH_Default_PFCdPFCm_2
379	HC vs TNpost (indep)	0.6944630049597106	0.4892807929870332	0.6964851145722892	FALSE	7Networks_RH_Default_PFCdPFCm_2
379	TNpre vs TNpost (paired)	0.5824166913530865	0.5637261075818082	0.7549903226542074	FALSE	7Networks_RH_Default_PFCdPFCm_2
380	HC vs TNpre (indep)	-0.0476362	0.9621293936790608	0.9884891030949254	FALSE	7Networks_RH_Default_PFCdPFCm_3
380	HC vs TNpost (indep)	-0.72954	0.4677159671415072	0.6745903372233277	FALSE	7Networks_RH_Default_PFCdPFCm_3
380	TNpre vs TNpost (paired)	-1.56555	0.12574419586343055	0.33068125797311104	FALSE	7Networks_RH_Default_PFCdPFCm_3
381	HC vs TNpre (indep)	-0.205198	0.8378885015291959	0.9353173970558466	FALSE	7Networks_RH_Default_PFCdPFCm_4
381	HC vs TNpost (indep)	-0.638458	0.5248921397472908	0.7273332190493637	FALSE	7Networks_RH_Default_PFCdPFCm_4
381	TNpre vs TNpost (paired)	-0.690447	0.494108832762311	0.70169301694056	FALSE	7Networks_RH_Default_PFCdPFCm_4
382	HC vs TNpre (indep)	0.6751013022330394	0.5013860471779743	0.7078391254277284	FALSE	7Networks_RH_Default_PFCdPFCm_5
382	HC vs TNpost (indep)	-0.38685	0.699823092240272	0.8476128659861846	FALSE	7Networks_RH_Default_PFCdPFCm_5
382	TNpre vs TNpost (paired)	-1.06705	0.2926813341030618	0.5144816008574142	FALSE	7Networks_RH_Default_PFCdPFCm_5
383	HC vs TNpre (indep)	4.325716829883825	4.1375937286322336e-05	0.006610639088309547	TRUE	7Networks_RH_Default_PFCdPFCm_6
383	HC vs TNpost (indep)	2.3642328958116052	0.020353940053814593	0.10723606538569486	FALSE	7Networks_RH_Default_PFCdPFCm_6
383	TNpre vs TNpost (paired)	-1.59758	0.11842105987131081	0.3200569185711103	FALSE	7Networks_RH_Default_PFCdPFCm_6
384	HC vs TNpre (indep)	0.13752413888588583	0.890926370383682	0.9528624282178417	FALSE	7Networks_RH_Default_PFCdPFCm_7
384	HC vs TNpost (indep)	-0.303933	0.761913658884097	0.891996478693577	FALSE	7Networks_RH_Default_PFCdPFCm_7
384	TNpre vs TNpost (paired)	-0.256615	0.7988600918054735	0.9097032320749167	FALSE	7Networks_RH_Default_PFCdPFCm_7
385	HC vs TNpre (indep)	2.010062044577261	0.04748132880133256	0.17282969332071788	FALSE	7Networks_RH_Default_PFCdPFCm_8
385	HC vs TNpost (indep)	0.8754357897300957	0.383841092961288	0.597642962431898	FALSE	7Networks_RH_Default_PFCdPFCm_8
385	TNpre vs TNpost (paired)	-1.48501	0.1457903552722556	0.34875365414421505	FALSE	7Networks_RH_Default_PFCdPFCm_8
386	HC vs TNpre (indep)	1.1782408838413938	0.24145649605142247	0.47190194668030444	FALSE	7Networks_RH_Default_PFCdPFCm_9
386	HC vs TNpost (indep)	1.0152123825391157	0.31299381269619564	0.5327554258658649	FALSE	7Networks_RH_Default_PFCdPFCm_9
386	TNpre vs TNpost (paired)	-0.198816	0.8434664355238297	0.9397954713357435	FALSE	7Networks_RH_Default_PFCdPFCm_9
387	HC vs TNpre (indep)	2.7092226830690804	0.00831185867327385	0.07050890595225934	FALSE	7Networks_RH_Default_PFCdPFCm_10
387	HC vs TNpost (indep)	1.382747236567213	0.17037379832011815	0.37790860995220293	FALSE	7Networks_RH_Default_PFCdPFCm_10
387	TNpre vs TNpost (paired)	-1.43733	0.15880822201963796	0.36055194934390417	FALSE	7Networks_RH_Default_PFCdPFCm_10
388	HC vs TNpre (indep)	1.1753381173827446	0.2429580084661438	0.4725277312145422	FALSE	7Networks_RH_Default_PFCdPFCm_11
388	HC vs TNpost (indep)	-0.0131675	0.9895246647559248	0.9961593043081346	FALSE	7Networks_RH_Default_PFCdPFCm_11
388	TNpre vs TNpost (paired)	-1.13884	0.2618996983725531	0.4910619344485371	FALSE	7Networks_RH_Default_PFCdPFCm_11
389	HC vs TNpre (indep)	1.3633869258475195	0.1763231762064331	0.3868150117874218	FALSE	7Networks_RH_Default_PFCdPFCm_12
389	HC vs TNpost (indep)	0.5901437710517603	0.5566611037660276	0.7509261776279049	FALSE	7Networks_RH_Default_PFCdPFCm_12
389	TNpre vs TNpost (paired)	-0.087986	0.9303498892226808	0.9725891931586441	FALSE	7Networks_RH_Default_PFCdPFCm_12
390	HC vs TNpre (indep)	1.9875460002714247	0.050357128887091436	0.17984688888246939	FALSE	7Networks_RH_Default_PFCdPFCm_13
390	HC vs TNpost (indep)	-0.0295447	0.9764993406140748	0.9955813158342309	FALSE	7Networks_RH_Default_PFCdPFCm_13
390	TNpre vs TNpost (paired)	-2.57216	0.014139906919861495	0.09441159293196426	FALSE	7Networks_RH_Default_PFCdPFCm_13
391	HC vs TNpre (indep)	2.650857680166477	0.009334557533602184	0.07418191417432199	FALSE	7Networks_RH_Default_pCunPCC_1
391	HC vs TNpost (indep)	0.5237199776704643	0.6018226804140021	0.7774417946764121	FALSE	7Networks_RH_Default_pCunPCC_1
391	TNpre vs TNpost (paired)	-3.7203	0.0006412957458764014	0.017896625466318178	TRUE	7Networks_RH_Default_pCunPCC_1
392	HC vs TNpre (indep)	3.534239230209383	0.0007247073296813265	0.019273948774355086	TRUE	7Networks_RH_Default_pCunPCC_2
392	HC vs TNpost (indep)	0.2758049036024239	0.7833803255544236	0.9013004704365373	FALSE	7Networks_RH_Default_pCunPCC_2
392	TNpre vs TNpost (paired)	-3.80248	0.0005050226409980066	0.015948083399937047	TRUE	7Networks_RH_Default_pCunPCC_2
393	HC vs TNpre (indep)	2.4696301209563787	0.015306876059422629	0.0971020611241482	FALSE	7Networks_RH_Default_pCunPCC_3
393	HC vs TNpost (indep)	0.41726585875584543	0.6775248674798433	0.8361569172318949	FALSE	7Networks_RH_Default_pCunPCC_3
393	TNpre vs TNpost (paired)	-2.46084	0.018517863999230073	0.10240293455795431	FALSE	7Networks_RH_Default_pCunPCC_3
394	HC vs TNpre (indep)	1.9090628069076998	0.05954186435063147	0.20049232647217816	FALSE	7Networks_RH_Default_pCunPCC_4
394	HC vs TNpost (indep)	0.14333453136217886	0.8863703258405161	0.9496824919719815	FALSE	7Networks_RH_Default_pCunPCC_4
394	TNpre vs TNpost (paired)	-2.28646	0.027889811177675788	0.13058804274782015	FALSE	7Networks_RH_Default_pCunPCC_4
395	HC vs TNpre (indep)	1.0707539421963292	0.2870665690055003	0.5118571809904909	FALSE	7Networks_RH_Default_pCunPCC_5
395	HC vs TNpost (indep)	-0.612002	0.5421717266863231	0.7392463471568288	FALSE	7Networks_RH_Default_pCunPCC_5
395	TNpre vs TNpost (paired)	-3.09515	0.00368313911540352	0.04464411048973963	TRUE	7Networks_RH_Default_pCunPCC_5
396	HC vs TNpre (indep)	2.252162335695774	0.026410177040871823	0.1252656618539375	FALSE	7Networks_RH_Default_pCunPCC_6
396	HC vs TNpost (indep)	-0.974052	0.3327695157129458	0.5494937256420973	FALSE	7Networks_RH_Default_pCunPCC_6
396	TNpre vs TNpost (paired)	-3.73755	0.0006100316801132403	0.017896625466318178	TRUE	7Networks_RH_Default_pCunPCC_6
397	HC vs TNpre (indep)	1.9480978289700666	0.05498681956584545	0.19237371276680626	FALSE	7Networks_RH_Default_pCunPCC_7
397	HC vs TNpost (indep)	-0.720565	0.47319112957778386	0.6808505461550848	FALSE	7Networks_RH_Default_pCunPCC_7
397	TNpre vs TNpost (paired)	-2.4129	0.02075802469083249	0.1083027375173869	FALSE	7Networks_RH_Default_pCunPCC_7
398	HC vs TNpre (indep)	1.0035701664099217	0.3183063799549758	0.5379826140084097	FALSE	7Networks_RH_Default_pCunPCC_8
398	HC vs TNpost (indep)	0.5850698260110707	0.560036284669597	0.7525683556590329	FALSE	7Networks_RH_Default_pCunPCC_8
398	TNpre vs TNpost (paired)	-1.4089	0.16699475644851206	0.37247901066582617	FALSE	7Networks_RH_Default_pCunPCC_8
399	HC vs TNpre (indep)	2.7452691617485017	0.007369692130258146	0.06599724295753563	FALSE	7Networks_RH_Default_pCunPCC_9
399	HC vs TNpost (indep)	1.383317660013321	0.1701974022879601	0.37790860995220293	FALSE	7Networks_RH_Default_pCunPCC_9
399	TNpre vs TNpost (paired)	-1.96775	0.05642611332731863	0.1945728045769608	FALSE	7Networks_RH_Default_pCunPCC_9

## Sheet: Table S4 PLS_Dis_Gene
Table S4 PLS_Weights_DiseaseEffect_Gene_PLS1
Gene
PTPRH
KANK4
STAR
TSPAN8
STC2
AIRE
EMILIN2
CRYBG3
DIO3OS
OSBPL3
CKMT2
CIDEA
RAB7B
CRTAC1
G0S2
SLC47A1
TNFRSF21
CDH6
SIAE
DPY19L1
PC
THEMIS
GUCY1A2
CRYBA2
SYDE2
ITGA7
SNX24
ZNF503
MGST3
THEMIS2
ANTXR2
MBOAT1
LRP12
PDLIM7
MREG
LCP2
OPN4
NRG1
DIO3
RCAN2
MTMR2
STK39
SDSL
TMEM255B
CPXM2
GPER1
DMBT1
TMX4
ENPP6
MYLK
ITPR3
USH1C
KCNJ8
VCL
PITPNA
VILL
GNA14
EPHB2
SLC6A13
SMYD2
COPA
RILP
SPSB1
NAPG
SLC5A11
PCDH12
CD8B
ST3GAL1
IFT57
VPS13D
ADAMTS2
PMEPA1
PPP1R3B
MIR22HG
DMRT2
SPHK2
SMIM37
VSTM1
KCNN4
TNNT2
ASNSP1
CLEC2L
HOXD1
FAM189B
MRPL47
SKAP1
ANXA4
GPIHBP1
STXBP5
MTX3
FGR
LIPC
SLC10A3
SCN4B
PTPRK
SPR
LGALS1
PHLDB2
CENPN
STAC2
SOAT1
NT5DC1
LOC100130691
ATP1B1
KIF26A
FHIT
AK2
ARL8B
NEFH
ACE
SNX21
CPPED1
P2RX6P
ZMPSTE24
PLBD1
ARHGAP25
MDH1
FKBP2
CAST
MX1
TMEM184C
GPR20
HIGD1B
EMB
LBH
BOLA3-AS1
DLC1
EIF4E2
FRK
MGST2
RBMS1
VASH2
CNKSR3
MFN2
SPARCL1
PFKP
HS3ST5
DNAJC22
GAL
TMEM155
RAMP3
MRPS22
GJC2
BCL11B
SPCS2
TRIM2
ADAD2
MTTP
MAP2K4
ABHD12
C9orf24
RAPGEF5
CD99L2
PTPRM
LOC284454
P2RX6
NEFL
FER1L4
LDLRAD4
LDB3
KCNS3
DIABLO
TMEM44
SACS
GSTT1
FAM171A1
DYNLT3
SDK1
TAX1BP1
SYNPO2
GBE1
RIMKLA
USB1
GLRX2
TEX26
KCNQ5
TMEM169
EMCN
SLC16A3
CCDC92
ARHGAP44
DOK3
NSF
TESC
KATNAL1
MGAT4C
ITGA8
SLCO2A1
NFE2L1
APOO
ISLR
EPN3
SLC25A3
KCNH6
PCP4
IFITM10
AGMAT
DCTN2
TCHH
KIF21A
NDUFB9
DMRTC2
TLK1
TBC1D9B
BLVRA
JPT2
NDUFA12
RRP12
MGC34796
MPC2
MARS
BACE1
SNAP25
MYOF
WNT6
C10orf143
MROH5
ROPN1L
PRCP
CTSV
ADAMTS4
LSG1
FAM98A
CLSTN2
NDUFA7
MAGEL2
NDUFA6
SRPRA
PLCH1
OXNAD1
PAQR6
TTC39A
FAM213A
ATP10A
ARHGEF16
MOBP
SNHG18
HYAL3
GJB1
VDAC2
OSTN
INIP
PEBP4
DHRS3
HAGLROS
NEB
NDUFAF4
TMEM14A
IL4R
ALDH1B1
ENPP5
NDFIP2
FNTA
ITIH5
TRIM16L
KCNC2
BCL2L13
HS3ST2
LGALS8
FAM69B
AR
ZFYVE19
FAM135B
ATP5MC3
SLC19A3
RHBDL2
MPP1
CCDC25
SLC25A25
ZNF385D
SIK2
QDPR
GRID1
ACTL8
TECTA
PTPRE
TRIM37
ABHD12B
CA13
GBP2
GOLGA7B
CCDC87
KREMEN2
RHOBTB2
RGS5
GTDC1
PSMD12
DCLK1
TEX47
ACAN
ESAM
MRPS9
SLC45A3
CHEK2P2
GCLM
MYOM2
E2F1
SV2C
CIAPIN1
GMPR2
LOC100128239
TMEM189
PCYOX1L
WDR45
TBX2-AS1
CSAG1
NEFM
TSPAN31
CDK18
CPT1A
RPS6KC1
SLC7A8
ISCU
FOXA3
BCAT1
CACNB1
GFRA1
NDUFV2
CHEK2
FAM78A
RAB11FIP5
MTHFD2
HSPE1
RARRES1
MITF
DEXI
GOT1
PRUNE2
KBTBD11
MGAT5
PEPD
FAM86HP
TMEM140
SLC25A5
RNF152
SNN
ELP3
IMPA1
PWP2
FGFR2
TF
RAB4A
ITGA11
GAL3ST1
ACVR1C
PIGK
TRPT1
CBX3
CTSZ
RAB37
PIF1
ADPRHL1
CAMK2G
PCDHB9
RFLNB
MRPL15
KCNQ1DN
C2CD2
FOXD1
MRPS14
SEMA4D
TMEM14B
SLC20A2
LOC100132831
CRBN
TMEM196
OLFM4
CARD14
NDRG4
CHP2
GREM2
RASSF2
SLC25A32
IQSEC1
TMX2
HSPA12A
NFS1
NAP1L1
BACE2
CRYBB1
TPMT
PHF23
WNT10A
ARHGEF17
MYC
HERC6
ENPP4
DENND2D
NRP1
ACYP2
CYCS
MCCC1
RABEP2
PLA2G7
TBX2
SLC7A1
IFIH1
KCTD9
FGD5
DIRAS1
BOLA3
ADARB2-AS1
PIGT
DPH3
LOC101927278
COL4A3BP
CNN1
RASSF3
COL5A2
GNG11
HCN1
LEF1
SAMHD1
IMMT
TMEM14C
TFDP2
EFNA5
SPP1
PPIF
KLHL29
RTCA
CDK2AP1
ANXA3
IDH3G
PCSK6
HAUS7
RABGGTA
SLC20A1
ONECUT2
ZEB2
NDUFA4
LOC100507507
RNF13
C19orf33
TPGS2
COPS5
MAP1B
SLC25A15
SYNCRIP
CARNS1
LIMK1
HHAT
SLFN5
MXRA7
TRIM35
TOR1AIP2
CIAO1
EPB41L4A
PRELID3B
LDLR
SYAP1
PRKCB
ATP5F1B
NAA25
KIAA1656
RNFT2
EPRS
FAM92A
ATXN3
C22orf46
GPR63
REXO2
KNG1
SLC8A1
TRIM58
SFTPC
PPTC7
BBIP1
GMPR
SMIM6
RNF128
SIRT2
GPR4
ATP2A2
RASGRP3
NCEH1
MAN2A1
FAM124A
HSD17B12
APOL2
ANO7
SYT2
INPP5A
UGP2
PPP1R9A
ATG5
ITGA2
FA2H
SLC35D2
MRPL12
STK24
SLC2A1
HARBI1
46083
SLC31A1
RANBP2
PCNT
COX4I2
STEAP1B
ENO3
MRPS36
EIF5A2
FSTL3
LAMA2
FZD10
PMPCB
CDH13
AKAP6
FBXO33
CHCHD4
ZMAT3
SERHL2
STN1
IFIT2
PNKD
ENPP7P13
RBM18
AKAP12
CLCN5
DTX4
PRKAG2
MYADML2
IGFLR1
UBE2F
GALNT1
ELOVL7
LAPTM4B
ANGEL1
EFL1
MYH10
DPH3P1
RBMS3
ATP6V1A
RNF220
UQCRC2
IMPAD1
NLN
ANXA6
SLC7A5
ECM1
TMEM70
KATNAL2
PCSK1
ZDHHC3
SOHLH1
BNIP3
COX6A1
MRPS15
CD59
FOXL2
PSEN2
S1PR5
CAB39
MORF4L1
NUDT22
ZC4H2
SPHK1
SNRNP25
TRAK2
SORL1
CLCN6
GGT5
GALNT15
SYT6
AIMP2
MYO5A
INHBA
ST8SIA5
GPATCH2
CMC2
MTMR4
OGDHL
PPIC
PRKCQ-AS1
AGPAT3
CHRNA4
EMC10
MAD1L1
MATN3
POU2AF1
COLGALT2
HACL1
SLC49A3
RASSF5
POU3F1
PDE11A
PEX14
ATP5PB
TBC1D12
FAT3
CPEB3
CCDC160
LOC100286906
KYNU
TBRG1
BCL6B
FJX1
TMEM63A
PKM
LRRC4C
ACHE
ASGR2
DDB2
ANKRD27
LMLN
SH3BGRL2
GLT1D1
SAP30
CADPS
DNM1L
LINC00680
WDR41
SAP30L
CAPN1
ANKRD29
STMN2
CCNE2
PRR5L
HOMER1
RNF157
GOLGA5
TOX2
APOOL
PPARGC1A
LOC407835
USP30-AS1
AHNAK2
ANKRD2
CNIH4
ELOVL1
ARHGEF4
TRADD
PLOD3
LDHB
CMTM5
MAP9
PIM3
RHOBTB1
AMDHD1
KLK6
HLA-DQB2
PHLDA3
ATP1B3
CERNA1
PRKACA
KCNA1
ST3GAL4
KCNK15
TMEM184B
ESRRA
RHOF
MOG
TRAPPC13
CACYBP
USP35
CCNE1
HLF
MMP15
MYO5B
KCNS1
DCAF13
ARPC1B
COX17
SYMPK
GPX3
PLCD4
SORT1
C12orf49
GDPD5
ESYT1
CCDC149
MAGI1
HSPB3
SYNJ2
SMIM12
SLC31A2
NAT8L
TEX30
ARHGAP9
MRPL27
DHRS7
MYLK4
GSTO1
SFXN4
TACC3
ERG
STRADA
CELF2
PPP1R17
COX6C
MAP1A
COX11
A3GALT2
PACS2
RDH11
STBD1
SYPL1
COX7A2
MECOM
TIGAR
AMPD3
HSD11B1
SUSD4
APOL1
ADSSL1
CHST15
SLC24A2
NREP
HARS
ANO5
USP31
ADAM23
MARF1
MAG
PDE4A
UBE3B
RNF141
B3GALT2
XPR1
RIMS2
HES6
PRDM1
TRPM4
ERMN
MADCAM1
GRIK4
KIF13B
IP6K3
FAM95C
ANXA5
TICAM1
ACOT13
CORO2A
ABCC9
S100A8
ARV1
CFL2
DPAGT1
CNTN4
BICDL2
HSPB2
NDE1
SNX12
MRPL4
RRS1
IMPG2
KITLG
STAU2
TMCC2
SH3TC2
TMEM182
EIF5
SOX17
LTBP1
HPF1
MEI1
MPC1
OPA3
LRRC59
SLC13A3
SYNJ1
PCP4L1
PTP4A1
CDHR1
GEM
DSCAML1
SLC25A40
LRRC20
RASGRP2
RNF130
LOC100130264
VPS35
ANLN
LOC494141
RELL1
POPDC3
LINC01158
DACH1
ENDOG
PLEKHA1
UQCRC1
KCNA3
NOL3
FLII
UBIAD1
CLDND1
ETHE1
APOL4
DLD
IGFBP2
EPHB6
TRIM41
GGNBP2
SCN8A
MYO1D
CH25H
HMOX1
TOMM40
PSMC2
FLVCR1-AS1
RNASEL
KRT17P5
HMBS
CTSA
SPDEF
ADO
ARL2
GOT2
ATP1A1
TPTE2P6
GFRA2
PARP3
SPAG4
CBLN2
UBE4B
UQCRB
HAPLN4
HSPA9
ASB2
CEP63
SERTAD4-AS1
SH3BGRL
FITM2
HSPA4
TIAM2
TMEM37
UBE2W
EPB41L4A-AS2
STARD4
CCDC39
SLC35F1
DEPP1
MPP7
FGFR1OP
ELAVL2
FOCAD
C11orf24
MOCS1
LRRC38
STK38L
LINC01399
CCDC115
MCF2
PDHA1
C12orf10
DOCK6
RBP7
AKR1C4
TMEM204
LSS
PRPSAP1
DOHH
LINC01963
PIEZO2
PTGR1
KCNAB2
TM4SF18
KIAA0232
PDK3
BCAP31
SCRG1
FDX1
LUZP1
CACNA2D3
NUDT8
CHST2
CA14
CCNL2
EMBP1
TCIM
NFIC
BTBD16
PP12613
SLC4A2
SETMAR
SEMA3A
KRTAP10-10
SH3PXD2A
NKG7
CD163L1
MYBL1
NKX6-1
CRISPLD1
URB1
FAM209A
MIGA1
COPS9
GLRX
SEMA3B-AS1
RNMT
CD300C
GNAS
DDX18
AMER1
LINC00652
EIF3IP1
SRP14-AS1
MVK
COPG1
APOLD1
MPP6
CEND1
PPIAP30
TNNT3
PLEKHA8P1
PLEKHB2
TC2N
CDC37
HPRT1
TULP4
SOD2
PLA2G4A
TMEM45B
GSTK1
ADRA1B
LGI3
MFF
RELL2
SEC14L5
PPP1R14A
LINC00839
TUBG1
CAPN3
MSANTD3
COL9A3
ID3
FLJ23867
TBX3
CLPTM1L
NAPB
SLFNL1
ATP5PO
CLSTN1
TBC1D19
GCSH
TRPM2
NF2
COX7B
CARD19
LOC101928303
TRAM2-AS1
RIT1
CYCSP52
ARRDC2
ATXN7L3
DCUN1D4
CCM2
LY96
LMO4
IVNS1ABP
ATP6AP2
ESRRG
OXR1
EFR3A
PDHB
JDP2
ERICH1
INTS13
TTN
SGTB
TAB3
C12orf54
TUBGCP5
ABHD6
PRKAR2A
CCL2
FOLH1B
GCSHP3
TMEM191A
SELENOP
TMEM165
ITGB1BP1
TMEM132C
EIF4E1B
TUBA8
CSAG4
DNAJA3
HAPLN2
CHCHD10
CBR4
DNAJB14
ADORA1
CPLX1
SMIM10
RERGL
CTXN3
ELOVL6
NKX3-1
SLC22A18
C6orf106
PFN1
SEMA5A
SLC35C1
SLAMF8
CRYGD
KNOP1
PFKM
MYO9B
SGK2
MOGAT1

## Sheet: Table S5 PLS_Treat_Gene
Table S5 PLS_Weights_TreatmentEffect_Gene_PLS1
Gene
ADCY7
C1S
EPOP
GPNMB
UBE2Z
HSD11B1L
SVOP
C2CD4C
SH2B3
TPST1
SLC26A4-AS1
HTR7P1
FREM3
ARHGAP33
MTA3
SSTR1
CRIP2
BAIAP2L2
SHISAL1
KIF21B
ADTRP
KCNMB4
E2F3
FKBP1A
DLG2
WDR86
KIRREL2
TNFRSF11A
STOML1
SKAP2
PTPRF
EFCAB1
SPPL3
TMEM150C
TOM1L1
LYPD8
EPHA10
WTIP
BATF3
SHISA5
CYB5D2
CELF5
MAFG
LINC02361
PPP4R4
SMIM29
MSANTD1
FAM110C
B3GNT2
EFNB2
ZNF226
ATP2B4
SMIM10L2B
BAIAP3
STYK1
PYCR3
TPD52
CEP170B
GLRA3
DYRK2
MOB1B
CCDC3
NTNG2
DHX58
MRAS
SLC26A4
COL5A3
MPV17L2
PSMG3-AS1
WNT10B
HMGCS1
AMIGO2
NT5DC3
FAM120AOS
TBC1D13
VWCE
RASAL1
SMIM10L2A
TM2D3
LOC101930085
PTGES
CGREF1
ADRA2C
HRASLS
RBP4
CHST1
CYP46A1
FBXL16
BEGAIN
SQLE
CTNND2
PIANP
PDE2A
RILPL2
C16orf58
STX12
ACTG1
HTR7
TNNT1
DDRGK1
NKD2
CDKN2D
SYT17
NOV
NECAB2
ACKR3
ADCY2
LOC440934
AHRR
NIT2
MTCH1
RTP1
DGKB
PNCK
JPH3
ARHGEF28
RAB36
SCN3B
PCDH20
RAET1E-AS1
DENND1A
TCTA
MCUB
ACTC1
SSBP4
TUBB2A
PID1
GGCT
TECPR2
MGRN1
ANO3
TIMM10
VPS37C
CDC42BPB
BTBD9
PRKCD
DCAF11
RER1
RGL3
XYLT1
MYB
SNCA
MUM1L1
RTN4RL2
DKFZp779M0652
B3GALT6
STX1A
SNRNP27
PRKCG
RTL8C
TMEM130
C8orf46
DOK6
AKAP8
PSORS1C1
TMEM263
EXOC6
SLC25A23
ATP9A
GDA
ELFN2
MVD
PNPLA3
SUB1
CFAP52
CERS1
ARHGAP1
B4GALT2
MCUR1
FDPS
LRRC73
AP3S1
LOC101927027
PITPNM2
UBE2S
CTXN1
HMGCR
CYP26A1
ENOX1
PTRH1
SCPEP1
HDAC9
LY6H
ACOT2
LDHD
KLHDC8B
CA10
CDH9
GNB4
GNAQ
MBOAT7
NDUFAF8
FTH1
PCED1B
DPF1
MKL2
FZD8
SLC26A11
CHST15
IFT22
KLHL2
OGG1
OCA2
PARP1
CYB5R1
SHISA9
TMEM158
YPEL1
KCNA5
TSPOAP1
SUSD1
GNPTAB
NUDT11
DNAH5
MYADM
PUSL1
ASCL2
DPP10-AS1
CHMP1A
SPON2
LINC01547
FADS3
LOC100288911
C16orf95
ZSWIM9
SLIT1
TRIM22
ARHGAP28
PLXNA1
SMIM27
SH3RF1
ICAM5
DOC2A
BABAM2
RTL8A
LAMA1
TNFRSF14
PPEF1
GMFB
ADRA1B
FIGNL2
ARPP19
CTC1
FXYD6
THBD
HSP90B1
DHCR7
CD63
DDX10
SNX7
FAM102B
PCBD1
PLPPR3
ABCB6
EFNB3
SDK2
TBXA2R
PLAC9
WIZ
RGMB
RBM8A
MYH7
CD81
UCHL1
NISCH
ARNT2
TTYH1
TMSB10
AP1S1
CHRDL1
SIN3B
SLC25A22
KLK7
AP3M2
KXD1
HPCAL4
C1orf50
PRNP
LINC02217
ARMCX1
FOXF2
LOC441052
VSTM2L
C1QL3
DPYSL3
AP1M1
CPNE7
PTHLH
FGD3
WDR66
SMAD3
PYGL
ACAT2
CSGALNACT1
GRIN3A
SCARA5
ZSCAN18
TMEM108
YWHAH
TUBA1B
PEX10
RAB35
BCKDK
ADGRB3
PEX19
NUDT4
UBA52
DDAH1
ADGRG1
CLIC5
PRDM16
HRH1
ZNF710-AS1
SH2D5
CACNA1H
PACSIN1
SEMA4F
LINC00461
WFDC1
NWD2
CHCHD6
PDGFC
DYDC2
LOC728392
STUM
CALML3
PPP5D1
KLF10
TMEM106A
NCAM2
SPINT2
LMO3
CXorf57
TFPT
CCDC85A
LOR
ACTR1A
KIF2A
TMEM164
HBQ1
ATP6V1C1
ARHGDIB
MYL5
B3GAT1
GALNT14
LOC103344931
NACC1
KCNMB2
GLOD4
ARHGDIG
PLAC9P1
CMTM4
LRRC2
MMD
PEA15
NPPA
KLF8
SELENOW
TTPAL
TRUB1
CIB1
TM7SF2
TCEA3
STK32C
VEZT
C20orf27
SH3GL3
CARD17
NUDT10
RASL11B
HRAS
FADS2
CYP1B1
C1R
GDF10
HDC
PTGER3
LRRC42
PRR5
COPS4
GSS
PCOTH
ZNF469
GPR68
LINC02482
TPM3
NUDT14
TMEM200A
NBDY
ME1
CHID1
BAD
PTER
MRPL30
P2RX5
FAR2P1
CSPG4
DZIP3
MANF
NTSR1
ISLR2
BAIAP2
TSEN34
46085
OST4
NPTXR
LINC01140
OPTN
LYRM9
GPC4
MGST1
ZNF831
JPH4
KLK10
RIPOR2
CETN2
JMJD4
INPP5K
RBBP7
GSTM3
ARHGAP45
TMEM42
OPRM1
NDUFC2
DNALI1
ACADL
CREM
MORN4
HSPB3
LRRC57
GABRA5
LGI4
ARFGEF3
TGFBI
MDFIC
DDN
FUOM
MDGA1
PTGER4
SCG3
USP9X
FOXRED2
DOK1
RTBDN
FKBP1B
RAB3C
NADK2
TRIM27
COG5
NKAIN2
PHF24
NPY1R
SPRN
TUBB6
ARPC3
SGSH
SNX3
MEIS3
BIRC3
ALKAL2
ASS1
TUBB8P12
TMSB4X
VPS37D
HIST1H2BK
CHMP4A
CPNE5
NORAD
STMN1
B9D1
SLC35A2
UG0898H09
ACTR3B
C17orf67
SYTL5
THRA
RRP7A
SFTPD
SYNPR
DACT3
GSKIP
PALM
MAGED1
FNDC11
CRLF1
VIT
DYRK3
PNMA8A
L3MBTL4
NRCAM
PLPPR2
TBC1D24
RAP2B
PYCR1
C11orf97
CUL4A
CDH10
IL17D
ZMAT2
TRAPPC6A
HES4
RETREG1
C8G
CCNYL1
SIDT2
ADRB2
YJEFN3
CENPVL3
VAV1
DNAJC2
PERM1
GAP43
GPR150
C19orf12
B4GALT3
PNOC
FGFBP3
ABCC6
TRIM24
SLC7A4
SLC35F2
GRM3
ZBTB44
LOC285097
FLRT1
RUBCN
POLR2G
RNF150
TXNL4A
TSPAN33
ACOX3
MSMO1
DHCR24
NR1H3
TMEM120A
C2orf80
WSB2
FAM149A
TMEM196
DDAH2
CD6
RILPL1
A1BG-AS1
CEBPA
MRPS16
ST6GALNAC6
SHC2
SORCS2
IQSEC2
PMM1
CNGB1
BTBD1
PRSS35
DTNBP1
GABRB1
CDC42SE2
GMFG
CCK
SUMF1
B4GAT1
BRWD1
TRIP12
NELFE
IL33
DPYSL2
TMEM54
FLJ37035
SH3KBP1
MAGEH1
LOC101927420
LSM3
LOC105372480
TIMM8B
RAB3GAP1
GLP2R
PPP1R9B
ATOH7
GUK1
TXN
HGF
LARGE1
FDX1L
CCNH
EIF1
LOXL1
NFKBIE
PDGFRA
KCNQ2
GNB2
DUSP3
LINGO1
PUM3
FAM171B
ISYNA1
TLN2
FBXL2
FZD2
LASP1
DPYSL4
PACS1
RTL6
SLC2A4RG
FAM47E
RUNDC3A
TSC1
CHPF2
CCT5
CYB561
TPM3P9
SIRT3
SMIM4
ASL
DKK3
TDRD9
CABYR
GABBR1
PHF20L1
BEX1
MT2A
RXRA
KLHL25
CPAMD8
RHBDD2
LOC105374546
CORO1A
ZNF512B
TMEM184B
FAM71F1
UNC5B-AS1
PIK3CD
RSU1
SYNM
SEMA6B
IFI27L2
CCDC189
ATAT1
GLG1
RTN3
SOX11
LINC00320
LCLAT1
TINCR
PRICKLE2
PGGHG
PPM1M
BHMT2
FAM19A1
ACAD9
SOWAHA
KCNQ1
GPM6B
46082
RAB15
THNSL2
LTBP4
SOBP
TMEM53
PPDPF
CA11
PPP1R32
F12
TMEM59L
CFD
ADGRV1
EDARADD
NOVA2
PHACTR3
C5orf49
OAZ1
SNX13
PRAF2
C1QL1
MR1
FRA10AC1
UBE2D2
JADE2
SERP1
TUBB4B
CCDC68
KCNT2
TMEM176B
NKAIN3
PNMT
WDR31
BCRP2
CANX
KLRC2
ALPL
NSMF
ZNF436
MAPK8IP1P2
SMAD2
SNAI3-AS1
BORCS7
PSMD1
RIIAD1
ACTA1
TNNI3
SQOR
THTPA
FAM86FP
MYDGF
GPC1
CRMP1
DRAM1
CFL1P1
SH3BGRL3
KCNJ12
RSPH1
PDHB
AZIN1
CDH4
MZT2A
DDA1
LINC01197
ACOT8
TSTD1
TMEM256
ARL15
JAG2
NOL4
CACUL1
VAT1
SST
ASTN1
POLR2L
TNIK
MESP1
BCR
DNAJA1
VPS26B
PLB1
SERTM1
LOC101927752
ZC3HAV1
PMVK
CASP1
AK5
EMG1
NIPSNAP1
RASGEF1C
LY86-AS1
TNFAIP2
GNG4
HERC5
CHL1
LDOC1
JMJD1C-AS1
RNF11
NUDT2
KLK5
XKR4
SOX5
FAR2P2
LAMC3
CNR1
SUPT4H1
LOC100129291
TMEM65
NAV3
FILIP1
ORC6
LARS2
MAPK11
CMTM8
NPHS1
MAOB
ZNF239
CCL28
SLC27A5
SIRPA
FTL
MANEAL
STRAP
CARD16
ANKRD6
DPP10
C12orf76
ERICH6-AS1
GSTM5
RRAGC
KCNN3
GSTO2
GBA
ARL3
PGM2L1
C22orf39
CCBE1
FBXO2
AIFM2
SNAPC5
MRPL20
ME3
PCSK5
STK25
NAXE
CDC27
NUDT18
PRMT6
C2orf69
DUSP28
GATB
NLE1
GTF2F2
GABRA3
CINP
CPNE6
MYRIP
NT5DC2
GRIK3
RMI2
NCKAP1
SOX9-AS1
SUMO3
ADAMTS19
NPM3
LYRM2
LOC644936
NSFL1C
KLF6
MAST3
KCNG3
HSBP1
ZFP36L1
RDH11
GPT2
LOC642852
SLC16A2
HTR1A
PKIA
FAM131A
FDFT1
TRAPPC2L
BEX3
POLR3GL
NANOS1
USP12
FZR1
OVOL2
UBE2B
RIT1
RIPK2
TXLNB
TANGO6
MLNR
HCG23
UBE2L5
MT1M
IDH2
PHPT1
NOP56
CNTN1
IGF1
PAXBP1-AS1
ARHGAP5-AS1
SERPINB8
LOC100507516
HMGCL
GAST
DDB1
RPS10
GLI3
PPP1R12B
PRMT2
ECHS1
VSIG4
KRAS
EMID1
TEK
SERPINB2
MPI
LRRN2
SYT10
DHRS4
PTBP2
EMC7
MAPK3
CXCL14
GAR1
PBXIP1
LOC729970
EARS2
STMN3
DHRS9
GTDC1
CDO1
COPZ1
DDX54
CD83
ETFB
STAU1
CYP4Z1
SLC39A4
BEX2
DOCK6
LSM4
BORCS5
COL16A1
ZFP64
NUS1
ERFE
RAPGEF4
AKR7A2
IGFBP5
ADAP2
MCTP1
NPDC1
PSMB1
LMO1
UQCC2
ETNPPL
ARMCX2
EFHB
CNIH2
EDNRB
RGS4
DIO2
SP5
RAB27B
ST6GALNAC5
PON2
GRB14
ANO2
SGSM2
STIM1
TMEFF2
MRPL37
BRMS1L
GOLGB1
LOXL3
PSME2
TUBB8
ARL8A
MPRIP
PDS5A
ENO1
UFC1
ADGRL3
OXCT1
WLS
LONRF2
KCNG1
CPE
CD52
PSME1
GPC6
DCLK2
TADA3
GLT8D2
PCDH19
CCDC167
RASA4CP
GGN
WIF1
RALBP1
CYP51A1
MZT2B
GS1-124K5.4
TATDN2
ARHGAP20
SELENBP1
C12orf45
CRSP8P
NPY
SLCO1C1
PCDH10
SARNP
CHRNB1
AMN1
C21orf2
FOLR2
COMT
RCHY1
TMTC1
DPYD
EMP1
UCHL3
PRDX4
FAM102A
AGTPBP1
PSD3
CENPW
IMPACT
PJA1
S100A13
ANK3
SLN
GRASP
AEBP1
AZIN1-AS1
TOX3
TUNAR
TMEM208
SAP30BP
ENC1
PPP1R1A
ETFDH
ADIRF
DCUN1D5
LINC02076

## Sheet: Table S6 Screening
Table S6 Screening genes and coupling-related elements
DiseaseEffect						TreatmentEffect
Gene	R_value	P_uncorrected	P_corrected_FDR	Significant_FDR		Gene	R_value	P_uncorrected	P_corrected_FDR	Significant_FDR
SCN3A	-0.266622	6.16103e-08	1e-06	TRUE		CACNA1H	0.434972	6.79977e-20	1.69994e-18	TRUE
KNG1	0.262566	9.89395e-08	1e-06	TRUE		OPRM1	0.42382	7.21759e-19	9.02199e-18	TRUE
SCN8A	0.230797	3.09183e-06	2.6e-05	TRUE		SCN9A	0.377555	5.33582e-15	4.44652e-14	TRUE
SCN1A	0.209077	2.49634e-05	0.000156	TRUE		TNF	-0.370268	1.91834e-14	1.19896e-13	TRUE
IL1B	-0.206611	3.12305e-05	0.000156	TRUE		TAC1	0.350451	5.30528e-13	2.65264e-12	TRUE
BDNF	-0.199224	6.01273e-05	0.000251	TRUE		SCN1A	-0.330261	1.239e-11	5.1625e-11	TRUE
NEUROG1	0.14373	0.00396962	0.014177	TRUE		KNG1	-0.314784	1.19143e-10	4.25513e-10	TRUE
SCN9A	-0.125634	0.0119106	0.037221	TRUE		IL1B	0.310242	2.2592e-10	7.05998e-10	TRUE
CALCA	0.095758	0.0556748	0.121446	FALSE		NAV1	0.243504	8.25562e-07	2.29323e-06	TRUE
P2RX3	0.096564	0.053639	0.121446	FALSE		FOS	-0.225306	5.34796e-06	1.33699e-05	TRUE
HLA-B	-0.094757	0.0582939	0.121446	FALSE		TRPV1	-0.182628	0.0002406	0.000546817	TRUE
TAC1	0.100494	0.0445719	0.121446	FALSE		SCN3A	0.159216	0.00139944	0.0029155	TRUE
NAV1	-0.091856	0.0664668	0.127821	FALSE		BDNF	0.151117	0.00244314	0.00469834	TRUE
CACNA1B	-0.07725	0.122961	0.219574	FALSE		NEUROG1	0.129185	0.00969683	0.0173158	TRUE
TNF	0.069875	0.163067	0.271779	FALSE		LIPN	-0.123642	0.0133384	0.0222307	TRUE
BDNF-AS	-0.064909	0.195151	0.304924	FALSE		SCN4A	-0.119425	0.0168672	0.0263549	TRUE
CACNA1I	-0.057904	0.247917	0.364584	FALSE		CACNA1I	-0.096706	0.0532865	0.0783625	FALSE
TRPV1	-0.054692	0.27517	0.382181	FALSE		SCN8A	-0.064743	0.1963	0.272639	FALSE
SCN4A	-0.048468	0.333594	0.43894	FALSE		BMP2	-0.059468	0.235348	0.309668	FALSE
LIPN	-0.044369	0.376141	0.470176	FALSE		CALCA	0.051975	0.299756	0.371562	FALSE
CACNA1H	-0.040503	0.419178	0.476339	FALSE		CACNA1B	0.050666	0.312112	0.371562	FALSE
FOS	0.041519	0.407594	0.476339	FALSE		HLA-B	-0.036781	0.463213	0.526378	FALSE
OPRM1	-0.035251	0.482035	0.523951	FALSE		FGFR1	-0.024963	0.618641	0.672436	FALSE
FGFR1	-0.023419	0.64052	0.64052	FALSE		P2RX3	0.021598	0.666722	0.694502	FALSE
BMP2	0.024735	0.621846	0.64052	FALSE		BDNF-AS	-0.014969	0.765352	0.765352	FALSE

## Sheet: Table S7 Dis_Enrichment
Table S7 DiseaseEffect Top 20 clusters with their representative enriched terms
GO	Category	Description	Count	Log10(P)
GO:0015980	GO Biological Processes	energy derivation by oxidation of organic compounds	45	-16.02
GO:0072521	GO Biological Processes	purine-containing compound metabolic process	55	-13.79
GO:0098660	GO Biological Processes	inorganic ion transmembrane transport	70	-13.35
GO:0019752	GO Biological Processes	carboxylic acid metabolic process	67	-12.02
GO:0043603	GO Biological Processes	amide metabolic process	46	-11.68
WP534	WikiPathways	Glycolysis and gluconeogenesis	14	-10.05
GO:0006869	GO Biological Processes	lipid transport	38	-9.83
GO:0050804	GO Biological Processes	modulation of chemical synaptic transmission	48	-9.67
GO:0007005	GO Biological Processes	mitochondrion organization	39	-9.59
R-HSA-382551	Reactome Gene Sets	Transport of small molecules	56	-8.7
GO:0061061	GO Biological Processes	muscle structure development	46	-8.37
GO:0051046	GO Biological Processes	regulation of secretion	51	-8.26
GO:0010817	GO Biological Processes	regulation of hormone levels	47	-8.24
GO:0042391	GO Biological Processes	regulation of membrane potential	41	-7.76
GO:0043269	GO Biological Processes	regulation of monoatomic ion transport	39	-7.46
GO:0030029	GO Biological Processes	actin filament-based process	48	-7.44
GO:1901137	GO Biological Processes	carbohydrate derivative biosynthetic process	44	-7.19
WP5220	WikiPathways	Metabolic reprogramming in pancreatic cancer	11	-7.15
GO:0006066	GO Biological Processes	alcohol metabolic process	30	-6.62
GO:0062197	GO Biological Processes	cellular response to chemical stress	28	-6.21

## Sheet: Table S8 Treat_Enrichment
Table S8 TreatmentEffect Top 20 clusters with their representative enriched terms
GO	Category	Description	Count	Log10(P)
WP4718	WikiPathways	Cholesterol metabolism with Bloch and Kandutsch Russell pathways	17	-13.28
GO:1903530	GO Biological Processes	regulation of secretion by cell	51	-9.52
R-HSA-109582	Reactome Gene Sets	Hemostasis	51	-8.68
R-HSA-112316	Reactome Gene Sets	Neuronal System	39	-8.6
GO:0050804	GO Biological Processes	modulation of chemical synaptic transmission	45	-8.19
R-HSA-9675108	Reactome Gene Sets	Nervous system development	46	-7.91
GO:0044283	GO Biological Processes	small molecule biosynthetic process	42	-7.73
GO:0007264	GO Biological Processes	small GTPase-mediated signal transduction	29	-7.6
GO:0031175	GO Biological Processes	neuron projection development	54	-7.53
hsa04082	KEGG Pathway	Neuroactive ligand signaling	24	-7.38
hsa04081	KEGG Pathway	Hormone signaling	25	-7.19
GO:0051051	GO Biological Processes	negative regulation of transport	39	-6.95
WP5434	WikiPathways	Cancer pathways	41	-6.87
GO:0044057	GO Biological Processes	regulation of system process	45	-6.69
GO:0050808	GO Biological Processes	synapse organization	33	-6.62
GO:0007610	GO Biological Processes	behavior	48	-6.59
hsa04540	KEGG Pathway	Gap junction	15	-6.54
GO:0034762	GO Biological Processes	regulation of transmembrane transport	37	-6.48
GO:0051668	GO Biological Processes	localization within membrane	43	-6.35
WP5420	WikiPathways	ADHD and autism ASD pathways	32	-6.12
