# Supplementary material for: Transcriptional Correlates of Structure-Function Coupling Plasticity in Trigeminal Neuralgia: Unveiling the Synaptic and Metabolic Mechanisms of Recovery
Source: Research Square preprint supplement (doi:10.21203/rs.3.rs-8527336/v1), 2026-01-08
Supplement: Supplementary file 2 [file c193e1f3c9175fceffb01b5c.docx]

**Table 1 Demographic and clinical characteristics of the participants.**

|  | Healthy Control  (N=42) | Trigeminal Neuralgia (N=87) | | P-value | Statistic |
| --- | --- | --- | --- | --- | --- |
| Age (years) | 56.31 (7.32) | | 59.15 (12.20) | 0.102 | t=1.65 |
| Sex (Female/Male) | 25 / 17 | | 52 / 35 | 1 | χ² = 0 |
| Sindou Grade (N) |  | |  | < 0.001 | W=810 |
| Grade 0 | 37 | | 29 |  |  |
| Grade 1 | 0 | | 11 |  |  |
| Grade 2 | 4 | | 20 |  |  |
| Grade 3 | 1 | | 27 |  |  |
| Disease Duration(years) | N/A | | 7.8 ± 5.2 | N/A | N/A |

Data are presented as mean ± standard deviation for continuous variables and as count (N) for categorical variables. P-values for group comparisons were calculated using an independent samples t-test for age, a Chi-squared (χ²) test for sex, and a Mann-Whitney U test for Sindou grade. A p-value < 0.05 was considered statistically significant.
